# Supplementary material
Source: Royal Society of Chemistry journal article supplement (doi:10.1039/d6cc01502f)
Supplement: d6cc01502f1.pdf [file d6cc01502f1.pdf]

Electronic Supporting Information (ESI) for

## Mechanochemically-synthesised AIE-active receptors for selective ceftazidime sensing in high-water-content matrices

Krzysztof Melcer,<sup>a</sup> Tim David,<sup>b</sup> Bernd M. Schmidt,<sup>b</sup> and Artur Kasprzak<sup>\*a</sup>

<sup>a</sup> Faculty of Chemistry, Warsaw University of Technology, Noakowskiego 3, 00-664 Warsaw, Poland

\* corresponding author a-mail: artur.kasprzak@pw.edu.pl (A.K.)

<sup>b</sup> Institut für Organische Chemie und Makromolekulare Chemie, Heinrich-Heine-Universität Düsseldorf, Universitätsstraße 1, D-40225 Düsseldorf, Germany

### Table of contents

|                                                                                           |    |
|-------------------------------------------------------------------------------------------|----|
| <b>S1. Experimental methods</b> .....                                                     | 2  |
| <b>S1.1 Materials and methods</b> .....                                                   | 2  |
| <b>S1.2 Syntheses</b> .....                                                               | 2  |
| <b>S1.3 Optimisation of syntheses</b> .....                                               | 5  |
| <b>S1.4 Aggregation-Induced Emission (AIE) studies – preparation of the samples</b> ..... | 6  |
| <b>S1.5 Methodology for fluorescence quantum yield estimation</b> .....                   | 6  |
| <b>S1.6 Titration experiments methodology - spectrofluorimetry</b> .....                  | 6  |
| <b>S1.7 Titration experiments methodology – NMR studies</b> .....                         | 6  |
| <b>S2. NMR spectra</b> .....                                                              | 7  |
| <b>S.3 HRMS spectra</b> .....                                                             | 11 |
| <b>S.4 DFT computations</b> .....                                                         | 12 |
| <b>S5. Photophysical and AIE studies</b> .....                                            | 32 |
| <b>S5.1 Quantum yield measurement</b> .....                                               | 32 |
| <b>S5.2 UV-vis and fluorescence measurements</b> .....                                    | 32 |
| <b>S5.3 Dynamic Light Scattering measurements</b> .....                                   | 35 |
| <b>S6. Receptor studies</b> .....                                                         | 37 |
| <b>S6.1 Spectrofluorimetry</b> .....                                                      | 37 |
| <b>S6.2 NMR studies</b> .....                                                             | 64 |
| <b>S6.3 DLS studies</b> .....                                                             | 67 |
| <b>S7. Water and analytes characteristics</b> .....                                       | 69 |
| <b>S8. References</b> .....                                                               | 71 |

## S1. Experimental methods

### S1.1 Materials and methods

Materials. Chemical reagents and solvents were of the highest possible purity and were commercially purchased and purified according to the standard methods, if necessary. Thin-layer chromatography (TLC) and preparative thin layer chromatography (PTLC; 2 mm) on SiO<sub>2</sub> were performed using Merck Silica gel 60 F254 plates. PTLC on Al<sub>2</sub>O<sub>3</sub> was performed using ALOX-100 UV<sub>254</sub> plates (Macherey-Nagel).

Mechanochemical syntheses were performed in a Retsch MM400 ball mill using 1.5 mL or 5.0 mL stainless steel jars with 3.0 mm or 5.0 mm stainless steel balls (number of added balls is indicated in the synthesis section), at 30 Hz.

NMR experiments were carried out using a JEOL 600 MHz spectrometer (<sup>1</sup>H at 600 MHz; {<sup>1</sup>H}<sup>13</sup>C NMR at 151 MHz; <sup>19</sup>F NMR at 565 MHz) equipped with a multinuclear z-gradient inverse probe head or a Varian VNMR5 500 MHz spectrometer (<sup>1</sup>H at 500 MHz; {<sup>1</sup>H}<sup>13</sup>C NMR at 125 MHz) equipped with a multinuclear z-gradient inverse probe head. The spectra were recorded at 297.15 K, and standard 5 mm NMR tubes were used. <sup>1</sup>H NMR (δ<sub>H</sub>), {<sup>1</sup>H}<sup>13</sup>C NMR (δ<sub>C</sub>) and <sup>19</sup>F NMR chemical shifts were reported in parts per million (ppm) relative to the solvent signal, i.e., DMSO-*d*<sub>6</sub> δ<sub>H</sub> (residual DMSO) 2.50 ppm, δ<sub>C</sub> (residual DMSO) 39.50 ppm, and δ<sub>F</sub> (C<sub>6</sub>F<sub>6</sub>) -164.9 ppm. For the <sup>1</sup>H NMR receptor studies, spectra were recorded in DMSO-*d*<sub>6</sub> with TMS added as an internal standard (reference signal set to TMS, δ<sub>H</sub> = 0.00 ppm). NMR spectra were analysed with the MestReNova v12.0 software (Mestrelab Research S.L.).

ESI-HRMS (TOF) measurements were performed with a Q-Exactive ThermoScientific spectrometer.

UV-vis spectra were recorded with a WVR UV-1600PC spectrometer at a spectral resolution of 2 cm<sup>-1</sup>. For the UV-vis measurements, the wavelengths for the absorption maxima λ<sub>max</sub> were reported in nm.

Fluorescence spectra were recorded with a HITACHI F-7100 FL spectrometer. Parameters for the liquid spectra acquisition: scan speed: 1200 nm/min, delay: 0.0 s, EX slit: 5.0 nm, EM slit: 5.0 nm, PMT Voltage: 400 V. The wavelengths for the emission maxima (λ<sub>em</sub>) were reported in nm.

Dynamic light scattering (DLS) measurements were performed with Zetasizer Nano ZS (Malvern).

For sonochemical reactions, Bandelin Sonorex RK 100H (ultrasonic probe; ultrasonic peak output/HF power: 320W/80W; 35kHz) was used.

### S1.2 Syntheses

#### Synthesis of tricarboxylic acid **2**

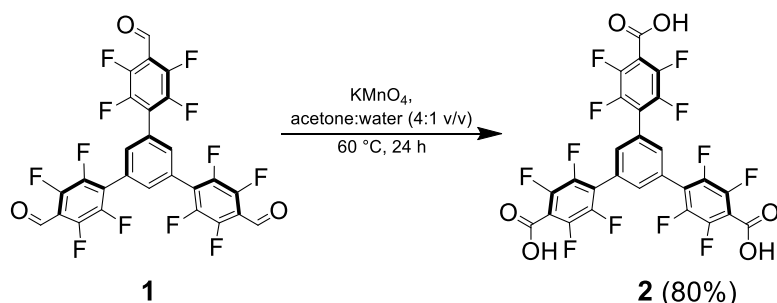

**Scheme S1** Synthesis of tricarboxylic acid **2**.

Synthesis via a modified literature procedure<sup>1</sup>. Into a 100 ml round-bottom flask, tricarboxaldehyde **1** (50.0 mg; 0.083 mmol), KMnO<sub>4</sub> (160.8 mg; 1.015 mmol), acetone (4 mL) and water (1 mL) were added. The reaction was

cautiously heated to 60 °C and mixed for 24 h. The formed brown precipitate (MnO<sub>2</sub>) was filtered off under reduced pressure and washed with water (50 mL). To the filtrate, 1 mL of 36% hydrochloric acid was added, and a white, fine precipitate was formed. The precipitate was then filtered and washed with water (20 mL). The precipitate was removed from the filter, which was washed with methanol, then the mixture was distilled off on a rotary evaporator and dried under vacuum. Tricarboxylic acid **2** was an off-white solid, obtained with 80% yield (43.3 mg; 0.66 mmol). NMR spectra were consistent with literature<sup>1</sup>.

### Synthesis of B3E

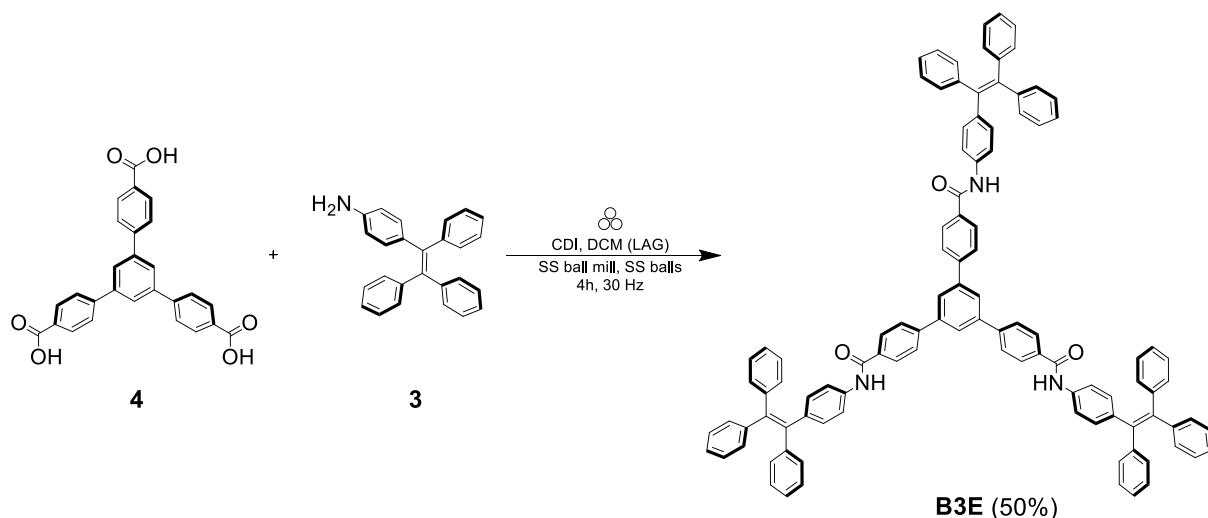

#### Scheme S2 Mechanochemical synthesis of dendritic amide **B3E**

Into a stainless-steel jar (1.5 mL), tricarboxylic acid **4** (6.6 mg, 0.015 mmol, 1.0 equiv.), amine **3** (32.8 mg, 0.090 mmol, 6.0 equiv.), and **CDI** (9.7 mg; 0.060 mmol; 4.0 equiv.) were added. Five stainless steel grinding balls ( $\varphi = 3$  mm) were added, together with dichloromethane (25  $\mu$ L). The reaction mixture was ground at 30 Hz for 4 h. Dichloromethane (15 mL) and methanol (2 mL) were added to remove the solid from the jar. 1M HCl (40 mL) was added, and the crude product was extracted with CH<sub>2</sub>Cl<sub>2</sub> (3x20 mL). Organic layers were combined and washed with water and brine. After drying with MgSO<sub>4</sub> and filtration, the solvents were distilled off on a rotary evaporator. Column chromatography was performed (SiO<sub>2</sub>, toluene:cHex:EtOAc = 5:4:1 vol., R<sub>F</sub> = 0.4), then PTLC was conducted (SiO<sub>2</sub>, toluene:cHex:EtOAc = 4:4:2 vol., R<sub>F</sub> = 0.7). For final purification, another PTLC was performed (Al<sub>2</sub>O<sub>3</sub>, toluene:cHex:EtOAc = 3:6:1 vol., R<sub>F</sub> = 0.25). The collected fraction was then distilled on a rotary evaporator and dried under vacuum. Product (**B3E**) was a colourless solid, obtained with 50% yield (10.4 mg; 0.0075 mmol).

<sup>1</sup>H NMR (DMSO-*d*<sub>6</sub>; 600 MHz; ppm)  $\delta_{\text{H}}$  8.62 (s, 3H), 7.25 (m, 2H); 7.18-7.06 (m, 41H), 6.99-6.94 (m, 23H), 6.84 (d,  $J = 8.7$  Hz, 6H)

{<sup>1</sup>H}<sup>13</sup>C NMR (DMSO-*d*<sub>6</sub>; 151 MHz; ppm)  $\delta_{\text{C}}$  155.3; 143.5; 143.4; 143.3; 140.3; 139.8; 137.3; 136.5; 131.2; 130.7; 130.6; 130.1; 129.3; 128.9; 128.2; 127.9; 127.7; 127.4; 126.5; 126.4; 125.5; 125.3; 117.3

HRMS (ESI)  $m/z$  [M+H<sub>2</sub>O-2H]<sup>+</sup> (associate with H<sub>2</sub>O) calcd. for C<sub>105</sub>H<sub>75</sub>N<sub>3</sub>O<sub>4</sub> = 1442.57856, found = 1442.63761

## Synthesis of F-B3E

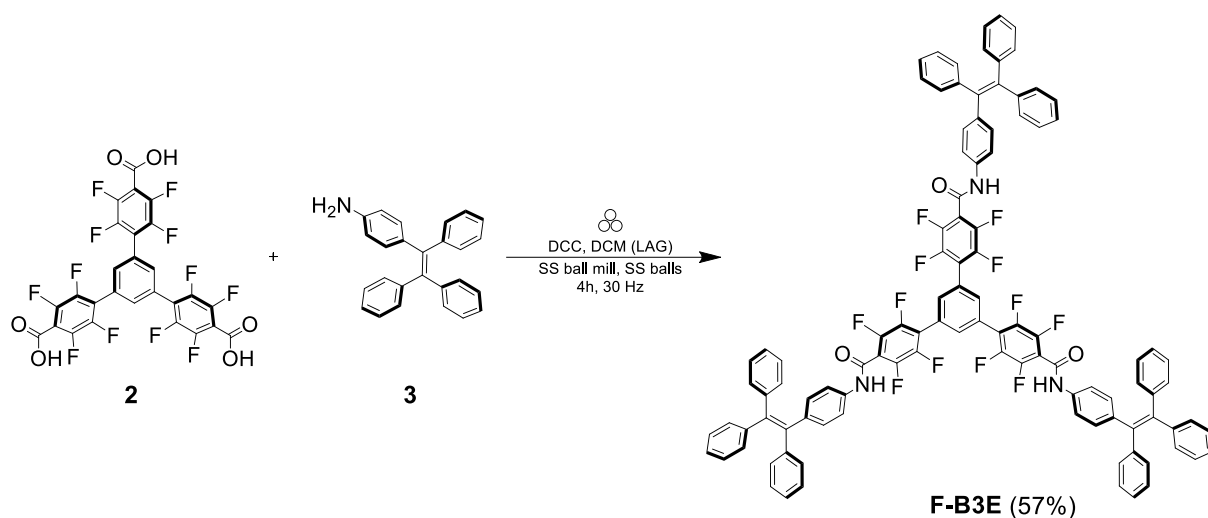

**Scheme S3** Mechanochemical synthesis of dendritic amide **F-B3E**

Into a stainless-steel jar (volume 1.5 mL), tricarboxylic acid **2** (4.9 mg, 0.0075 mmol, 1.0 equiv.), amine **3** (15.8 mg, 0.0450 mmol, 6.0 equiv.), and **DCC** (6.2 mg; 0.030 mmol; 4.0 equiv.) were added. Five stainless steel grinding balls ( $\varphi = 3$  mm) were added, together with dichloromethane (25  $\mu$ L). The reaction mixture was ground at 30 Hz for 4 h. Dichloromethane (15 mL) and methanol (2 mL) were added to remove the solid from the jar. 1M HCl (40 mL) was added, and the crude product was extracted with  $\text{CH}_2\text{Cl}_2$  ( $3 \times 20$  mL). Organic layers were combined and washed with water and brine. After drying with  $\text{MgSO}_4$  and filtration, the solvents were distilled off on a rotary evaporator. PTLC purification was performed ( $\text{SiO}_2$ , hexane:EtOAc 3:1,  $R_f = 0.5$ ), then column chromatography purification was conducted ( $\text{Al}_2\text{O}_3$ , hexane:EtOAc 7:3). For final purification, another PTLC was conducted ( $\text{Al}_2\text{O}_3$ , cHex:EtOAc =6:4 vol.,  $R_f = 0.8$ ). The collected fraction was then distilled on a rotary evaporator and dried under vacuum. Product (**F-B3E**) was a colourless solid, obtained with 57% yield (6.8 mg, 0.0041 mmol).

$^1\text{H}$  NMR (DMSO- $d_6$ ; 600 MHz; ppm)  $\delta_{\text{H}}$  11.01 (s, 3H), 7.99 (s, 3H); 7.43 (d,  $J = 8.7$  Hz, 6H), 7.17-7.14 (m, 6H), 7.12-7.06 (m, 22H), 6.99-6.93 (m, 23H)

$\{^1\text{H}\}^{13}\text{C}$  NMR (DMSO- $d_6$ ; 125 MHz; ppm)  $\delta_{\text{C}}$  155.3; 143.2; 143.1; 139.9; 139.7; 136.2; 131.4; 130.7; 130.6; 128.0; 127.9; 127.8; 126.6; 118.9

$^{19}\text{F}$  NMR (DMSO- $d_6$ ; 565 MHz; ppm)  $\delta_{\text{F}}$  -144.45-144.75 (m, 12F)

HRMS (ESI)  $m/z$  [ $\text{M}^+$ ] calcd. for  $\text{C}_{105}\text{H}_{63}\text{F}_{12}\text{N}_3\text{O}_3 = 1642.47059$ , found = 1642.47245

### S1.3 Optimisation of syntheses

Table S1 Optimisation table of B3E synthesis

| Carboxylic acid<br>(mg; mmol; eq)                 | Amine<br>(mg; mmol; eq)                        | Solvent<br>( $\mu$ l; $\eta$ ) | Coupling agent<br>(mg; mmol; eq) | Reaction conditions                                                                                  | Yield  |
|---------------------------------------------------|------------------------------------------------|--------------------------------|----------------------------------|------------------------------------------------------------------------------------------------------|--------|
| (4) TPB-(COOH) <sub>3</sub><br>(6.6; 0.015; 1.0)  | (3) TPE-NH <sub>2</sub><br>(31.3; 0,090; 6.0)  | DCM<br>(2000)                  | DCC<br>(12.4; 0,060; 4.0)        | Sonochemistry,<br>4 hours<br>T = 60°C                                                                | Traces |
| (4) TPB-(COOH) <sub>3</sub><br>(6.6; 0.015; 1.0)  | (3) TPE-NH <sub>2</sub><br>(31.3; 0,090; 6.0)  | DCM<br>(1000)                  | CDI<br>(9.7; 0,060; 4.0)         | Sonochemistry,<br>4 hours<br>T = 60°C                                                                | 30%    |
| (4) TPB-(COOH) <sub>3</sub><br>(6.6; 0.015; 1.0)  | (3) TPE-NH <sub>2</sub><br>(31.3; 0,090; 6.0)  | DCM<br>(100)                   | CDI<br>(9.7; 0,060; 4.0)         | Sono-Mechanochemistry <sup>a</sup> ,<br>4 hours,<br>WUT Glass Mill                                   | 35%    |
| (4) TPB-(COOH) <sub>3</sub><br>(13.2; 0.030; 1.0) | (3) TPE-NH <sub>2</sub><br>(31.3; 0,090; 3.0)  | DCM<br>(25; 0.40)              | DCC<br>(18.6; 0,090; 3.0)        | Mechanochemistry,<br>4 hours,<br>5×3 mm SS balls                                                     | Traces |
| (4) TPB-(COOH) <sub>3</sub><br>(13.2; 0.030; 1.0) | (3) TPE-NH <sub>2</sub><br>(62.6; 0,180; 6.0)  | DCM<br>(25; 0.25)              | DCC<br>(24.8; 0,120; 4.0)        | Mechanochemistry,<br>4 hours,<br>5×3 mm SS balls                                                     | Traces |
| (4) TPB-(COOH) <sub>3</sub><br>(6.6; 0.015; 1.0)  | (3) TPE-NH <sub>2</sub><br>(31.3; 0,090; 6.0)  | DCM<br>(25; 0.50)              | DCC<br>(12.4; 0,060; 4.0)        | Mechanochemistry,<br>4 hours,<br>5×3 mm SS balls                                                     | 40%    |
| (4) TPB-(COOH) <sub>3</sub><br>(6.6; 0.015; 1.0)  | (3) TPE-NH <sub>2</sub><br>(31.3; 0,090; 6.0)  | DCM<br>(25; 0.51)              | EDC·HCl<br>(11.5; 0,060; 4.0)    | Mechanochemistry,<br>4 hours,<br>5×3 mm SS balls                                                     | Traces |
| (4) TPB-(COOH) <sub>3</sub><br>(6.6; 0.015; 1.0)  | (3) TPE-NH <sub>2</sub><br>(31.3; 0,090; 6.0)  | DCM<br>(25; 0.53)              | CDI<br>(9.7; 0,060; 4.0)         | Mechanochemistry,<br>4 hours,<br>5×3 mm SS balls                                                     | 50%    |
| (4) TPB-(COOH) <sub>3</sub><br>(6.6; 0.015; 1.0)  | (3) TPE-NH <sub>2</sub><br>(31.3; 0,090; 6.0)  | EtOAc<br>(25; 0.53)            | CDI<br>(9.7; 0,060; 4.0)         | Mechanochemistry,<br>4 hours,<br>5×3 mm SS balls                                                     | Traces |
| (4) TPB-(COOH) <sub>3</sub><br>(6.6; 0.015; 1.0)  | (3) TPE-NH <sub>2</sub><br>(31.3; 0,090; 6.0)  | No solvent                     | CDI<br>(9.7; 0,060; 4.0)         | Mechanochemistry,<br>4 hours,<br>5×3 mm SS balls                                                     | Traces |
| (4) TPB-(COOH) <sub>3</sub><br>(6.6; 0.015; 1.0)  | (3) TPE-NH <sub>2</sub><br>(31.3; 0,090; 6.0)  | DCM<br>(50; 1.01)              | CDI<br>(9.7; 0,060; 4.0)         | Mechanochemistry,<br>2 hours of CDI-activation,<br>2 hours of milling with amine,<br>5×3 mm SS balls | Traces |
| (4) TPB-(COOH) <sub>3</sub><br>(33.3; 0.076; 1.0) | (3) TPE-NH <sub>2</sub><br>(152.8; 0,450; 6.0) | DCM<br>(125; 0.53)             | CDI<br>(48.7; 0,300; 4.0)        | Mechanochemistry,<br>4 hours,<br>5×5 mm SS balls                                                     | 25%    |

<sup>a</sup>Synthesis in WUT Glass Mill<sup>2</sup> with a glass vial placed in the ultrasonic probe

Table S2 Optimisation table of B3E synthesis

| Carboxylic acid<br>(mg; mmol; eq)                   | Amine<br>(mg; mmol; eq)                       | Solvent<br>( $\mu$ l; $\eta$ ) | Coupling agent<br>(mg; mmol; eq) | Reaction conditions                              | Yield |
|-----------------------------------------------------|-----------------------------------------------|--------------------------------|----------------------------------|--------------------------------------------------|-------|
| (4) F-TPB-(COOH) <sub>3</sub><br>(11.0; 0.015; 1.0) | (3) TPE-NH <sub>2</sub><br>(15.7; 0,045; 3.0) | DCM<br>(25; 0.69)              | DCC<br>(9.3; 0,045; 3.0)         | Mechanochemistry,<br>2 hours,<br>5×3 mm SS balls | 25%   |
| (4) F-TPB-(COOH) <sub>3</sub><br>(5.5; 0.015; 1.0)  | (3) TPE-NH <sub>2</sub><br>(15.7; 0,045; 6.0) | DCM<br>(25; 0.91)              | DCC<br>(6.2; 0,030; 4.0)         | Mechanochemistry,<br>2 hours,<br>5×3 mm SS balls | 57%   |
| (4) F-TPB-(COOH) <sub>3</sub><br>(16.5; 0.045; 1.0) | (3) TPE-NH <sub>2</sub><br>(47.1; 0,135; 6.0) | DCM<br>(75; 0.91)              | DCC<br>(18.6; 0,090; 4.0)        | Mechanochemistry,<br>2 hours,<br>4×5 mm SS balls | 20%   |

## S1.4 Aggregation-Induced Emission (AIE) studies – preparation of the samples

Studies on the AIE effect were conducted by measuring fluorescence spectra. Samples were prepared by subsequently adding 10  $\mu\text{L}$  of receptor stock solution in THF ( $C = 2 \cdot 10^{-3}$  M), then different amounts of THF and water (a total of 990  $\mu\text{L}$ ). Final samples were a series of receptor solutions ( $C = 2 \cdot 10^{-5}$  M) with water content in the range of 0 – 95 % vol.

## S1.5 Methodology for fluorescence quantum yield estimation

Measurements of fluorescence quantum yields ( $\Phi_F$ ) for the synthesised monoamides and dendritic-like molecules, as well as their aggregates, were performed at room temperature according to literature procedures. Fluorescence quantum yields ( $\Phi_F$ ) were determined by comparison with quinine sulfate (QS) in 0.5 M  $\text{H}_2\text{SO}_4$  ( $\Phi_{F,\text{ref}} = 0.551$ ) as the standard. The measurements were performed with highly diluted solutions, for which the absorbance ( $A$ ) at the highest wavelength was not higher than 0.1. The excitation wavelength ( $\lambda_{\text{ex}}$ ) for all samples were selected on the basis of the UV-vis spectra as  $\lambda_{\text{ex}} = 320$  nm. Concentrations were as follows:  $C_{\text{QS}} = 2 \cdot 10^{-6}$  M;  $C_{\text{molecule/aggregates}} = 2 \cdot 10^{-6}$  M. The following formula was used for the calculation of  $\Phi_F$ :

$$\Phi_F = \Phi_{F,\text{ref}} \frac{F_{\text{sample}}}{F_{\text{reference}}} \cdot \frac{1 - 10^{-A_{\text{ref}}}}{1 - 10^{-A_{\text{sample}}}} \cdot \frac{n_{\text{sample}}^2}{n_{\text{reference}}^2}$$

where  $\Phi_{F,\text{ref}}$  is the quantum yield for QS (0.551),  $F$  is the integrated area under the fluorescence spectra,  $A$  is the absorbance at the excitation wavelength, and  $n$  is the refractive index of the solvent (1.346 for 0.5M  $\text{H}_2\text{SO}_4$ , 1.4072 for THF, and 1.3329 for  $\text{H}_2\text{O}$ ,  $n$  for the aggregate solution in the given volume ratio was taken as the weighted arithmetic mean with weights equal to vol% of  $\text{H}_2\text{O}$  and THF in the mixture).

## S1.6 Titration experiments methodology - spectrofluorimetry

The binding experiments between **B3E** and **F-B3E** molecules (receptors) and antibiotics (analytes: Ampicillin, Penicillin, Amoxicillin in the form of sodium ( $\text{Na}^+$ ) salts, and Ceftazidime in the form of inner salt) were performed employing the fluorescence spectra titration experiments. The experiments were performed in the  $\text{H}_2\text{O}/\text{THF} = (80; 95; 99\%):(20; 5; 1\%)$  v/v systems as follows. A stock solution of amides and dendritic-like molecules ( $2 \cdot 10^{-3}$  M) in THF was diluted with an adequate volume of pure THF and  $\text{H}_2\text{O}$  to reach the final sample volume of 3 mL and the desired composition of solvents. The given antibiotic was introduced to the mixture as  $\text{H}_2\text{O}/\text{THF}$  solutions of the corresponding solvent content. Stock solution of real antibiotics for additional competitive titration tests were prepared as follows: hard capsules were opened, then content of capsule was introduced into  $\text{H}_2\text{O}/\text{THF}$  mixture; tablets were powdered with mortar and pestle, powder was introduced into  $\text{H}_2\text{O}/\text{THF}$  mixture. Then, titration experiments were conducted. First, fluorescence of a solution containing only a receptor was measured, then solutions containing the given antibiotic were added in 11 consecutive steps to achieve the following proportions of cation to receptor: 0.00, 0.25, 0.5, 0.75, 1.0, 2.0, 3.0, 4.0, 5.0, 10.0, 30.0 equiv. To ensure proper mixing, the cuvette contents were well mixed with a magnetic stirrer (1400 rpm) before the spectrum was measured.

## S1.7 Titration experiments methodology – NMR studies

Into an NMR tube, 400  $\mu\text{L}$  of stock solution of receptor in  $\text{DMSO}-d_6$  was placed ( $C = 7.628 \cdot 10^{-4}$  M). Then, in the case of the  $^1\text{H}$  NMR experiment, 100  $\mu\text{L}$  of  $\text{DMSO}-d_6$  with 0.03% and 300  $\mu\text{L}$  of  $\text{DMSO}-d_6$  were added. In the case of the  $^{19}\text{F}$  NMR experiment, 399.8  $\mu\text{L}$  of  $\text{DMSO}-d_6$  and 0.2  $\mu\text{L}$  of  $\text{C}_6\text{F}_6$  were added. NMR spectra at the starting point were measured. Then, appropriate amounts of Cef stock solution in  $\text{DMSO}-d_6$  ( $C = 7.628 \cdot 10^{-2}$  M) were added in portions (0.25 – 10 equiv.). After each addition the NMR spectrum was measured.

## S2. NMR spectra

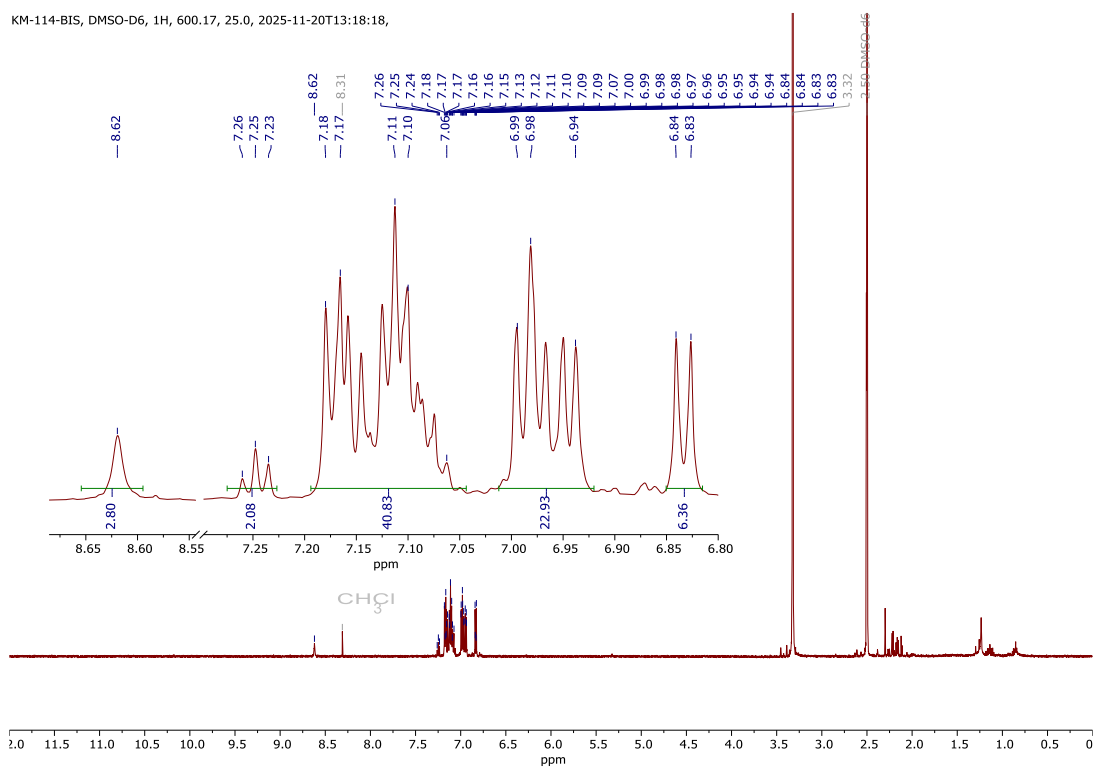

Figure S1 <sup>1</sup>H NMR spectrum (600 MHz, DMSO-d<sub>6</sub>) of B3E.

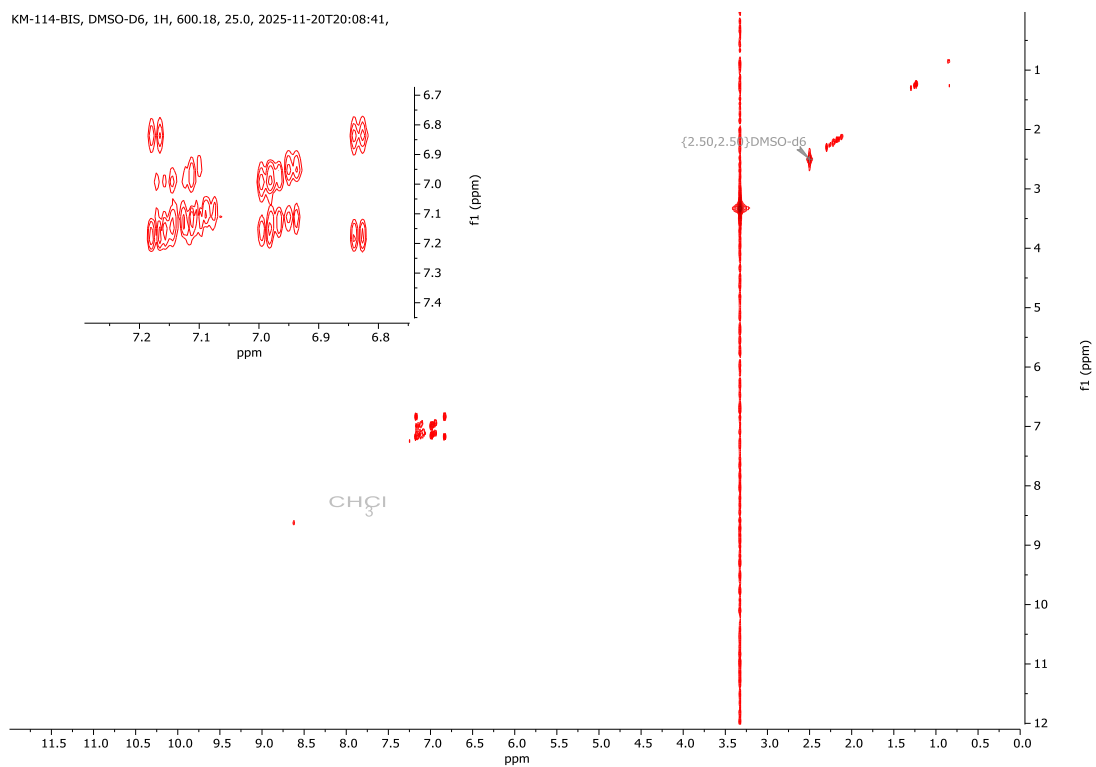

Figure S2 <sup>1</sup>H-<sup>1</sup>H COSY NMR spectrum (600 MHz, DMSO-d<sub>6</sub>) of B3E.

KM-114-BIS, DMSO-D6, 13C, 150.93, 25.0, 2025-11-20T21:29:49,

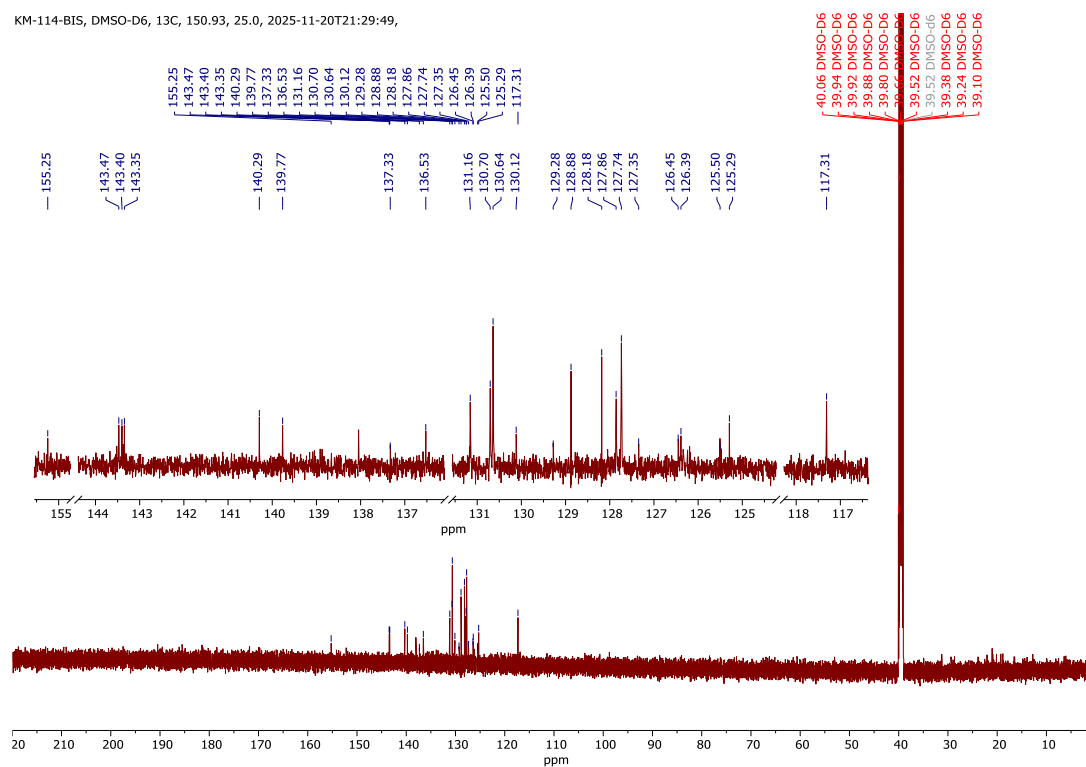

Figure S3  $\{^1\text{H}\}^{13}\text{C}$  NMR spectrum (151 MHz,  $\text{DMSO-}d_6$ ) of B3E

KM-097-F1, DMSO-D6, 1H, 600.17, 25.0, 2025-10-21T10:39:08,

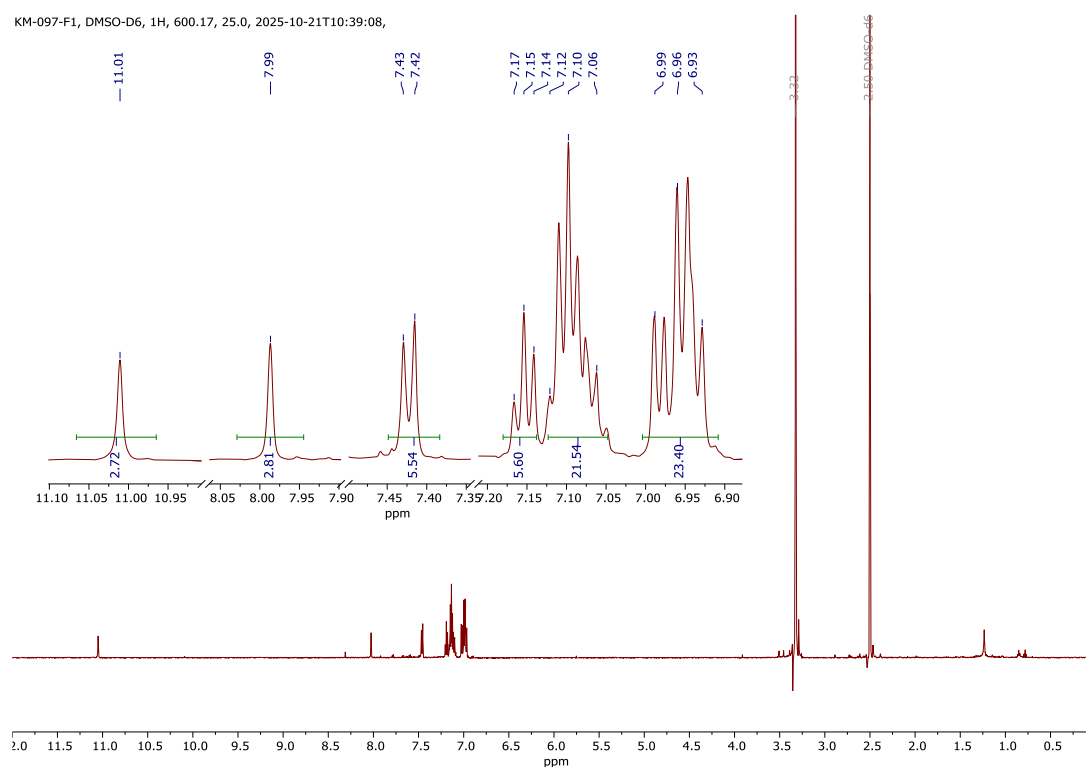

Figure S4  $^1\text{H}$  NMR spectrum (600 MHz,  $\text{DMSO-}d_6$ ) of F-B3E.

KM-097-F1-C6D6, DMSO-D6, Fluorine19, 564.68, 25.0, 2025-10-23T14:14:20,

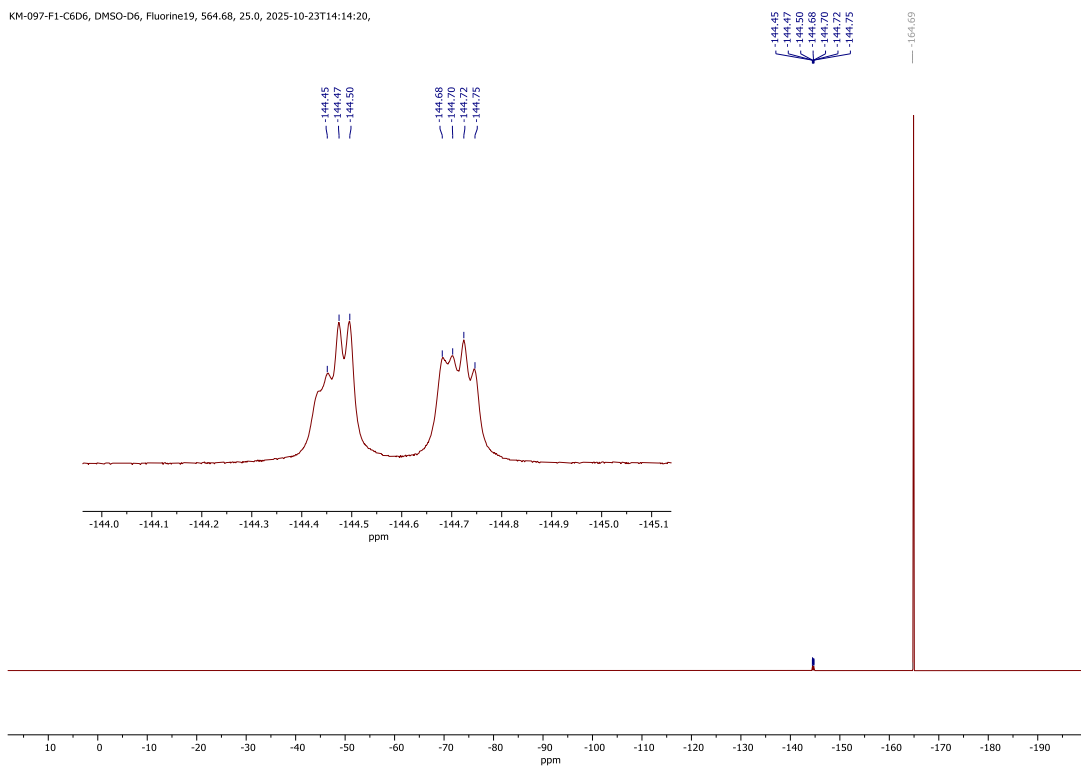

Figure S5  $^{19}\text{F}$  NMR spectrum (565 MHz,  $\text{DMSO-}d_6$ ) of F-B3E.

KM-097-F1-cosy, dmsol,  $^1\text{H}$ , 499.87, 25.0, 2025-10-22T18:27:54,

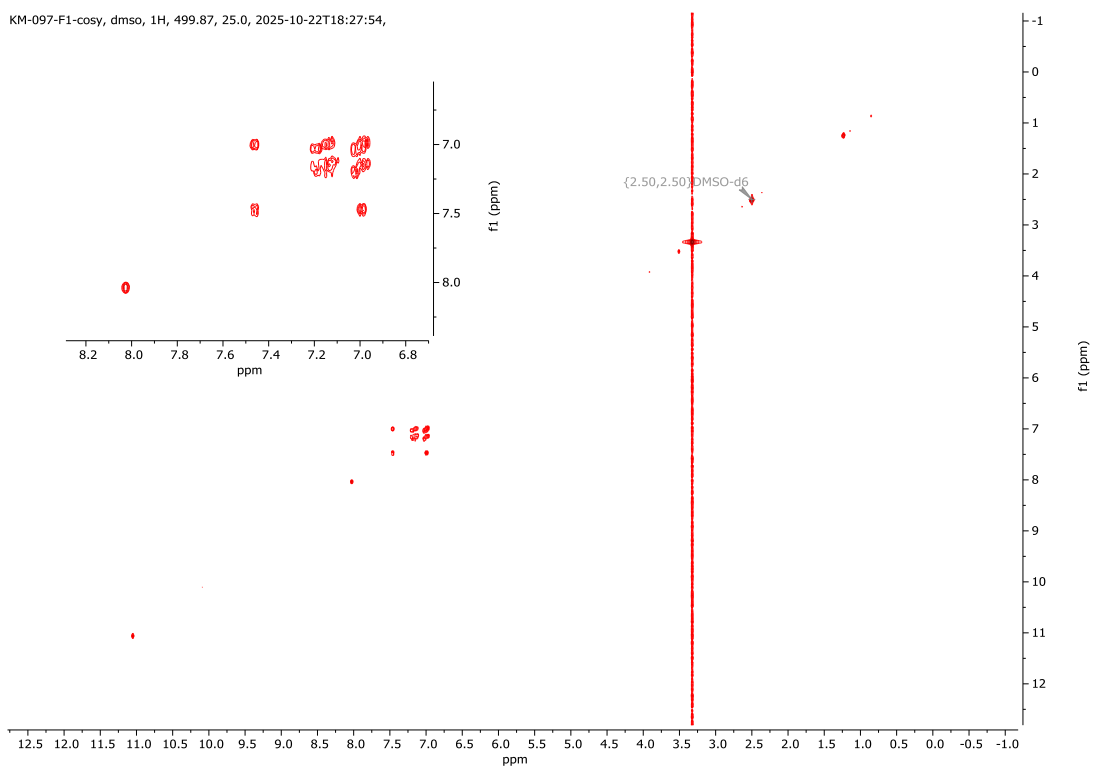

Figure S6  $^1\text{H}$ - $^1\text{H}$  COSY NMR spectrum (500 MHz,  $\text{DMSO-}d_6$ ) of F-B3E.

KM-097-F1-c-noc, dms0, 13C, 125.71, 25.0, 2025-10-22T15:47:20,

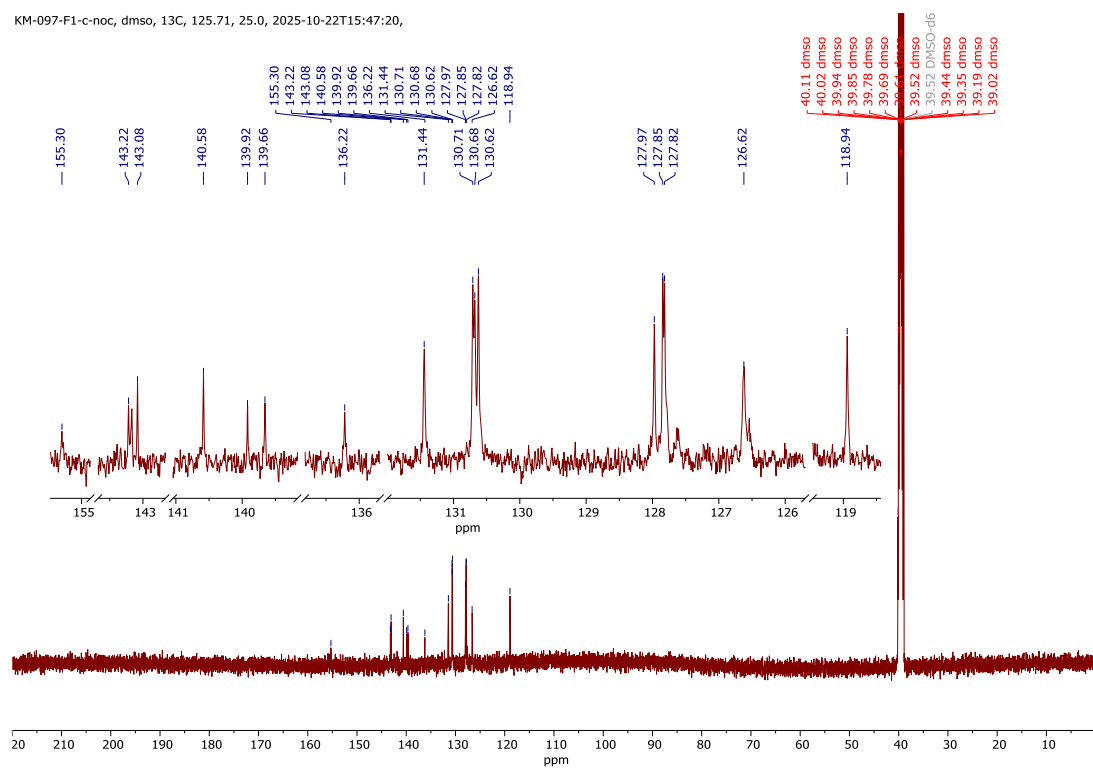

Figure S7  $\{^1\text{H}\}^{13}\text{C}$  NMR spectrum (125 MHz,  $\text{DMSO-}d_6$ ) of F-B3E.

### S.3 HRMS spectra

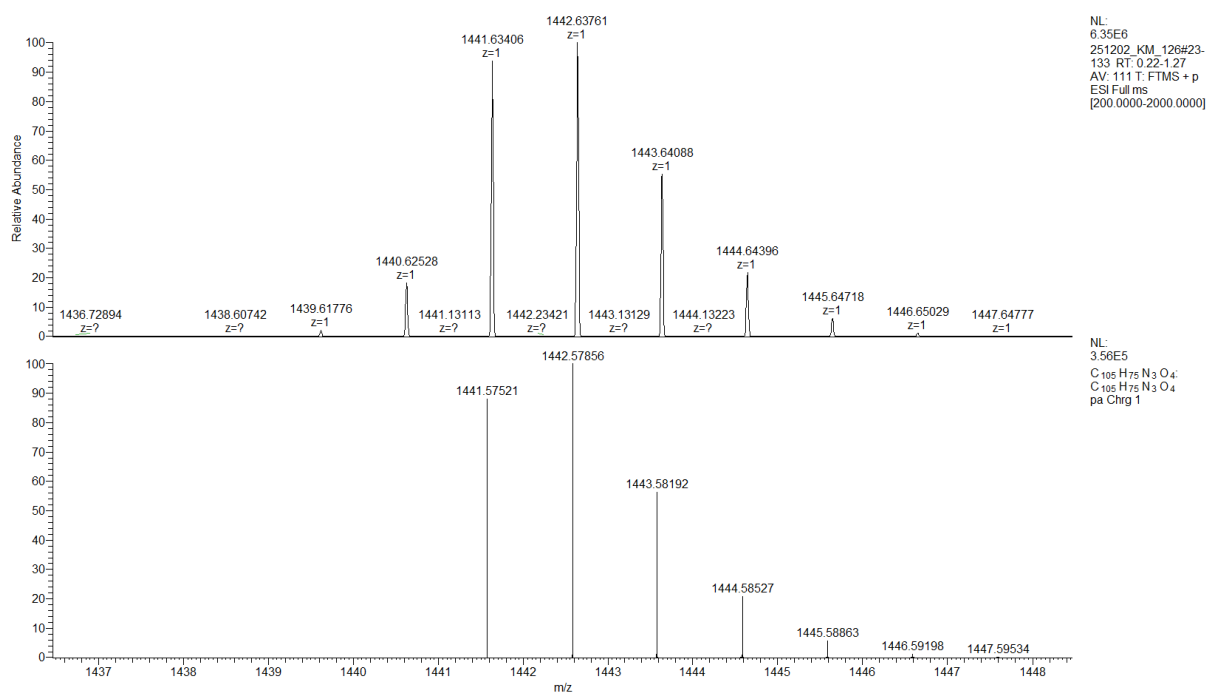

Figure S8 ESI-HRMS (TOF) spectrum of B3E.

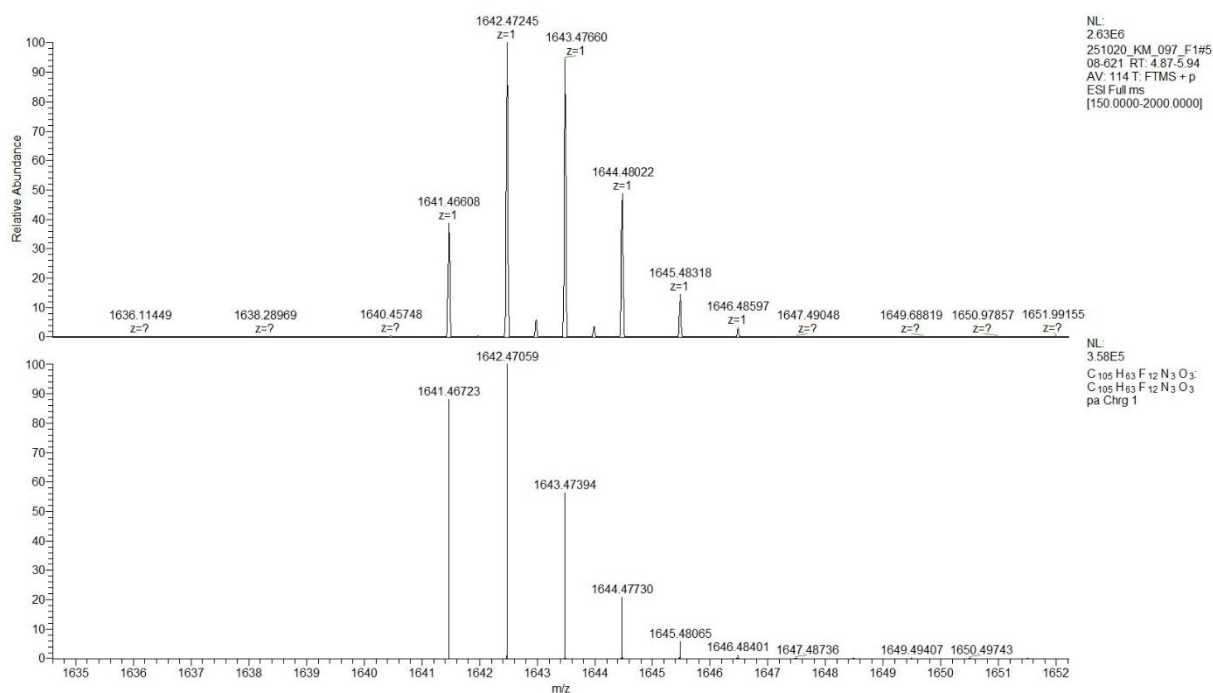

Figure S9 ESI-HRMS (TOF) spectrum of F-B3E.

## S.4 DFT computations

Density functional theory (DFT) computations (Gaussian software<sup>3</sup>) were performed with the B3LYP functional<sup>4</sup> and the 6-31g(d,p)<sup>5</sup> basis set. After structure optimisation, vibrational frequencies were calculated. All optimised structures represent minima, as no imaginary frequencies were detected. Electrostatic surface potential (ESP) maps were generated and analysed using the GaussView<sup>6</sup> software.

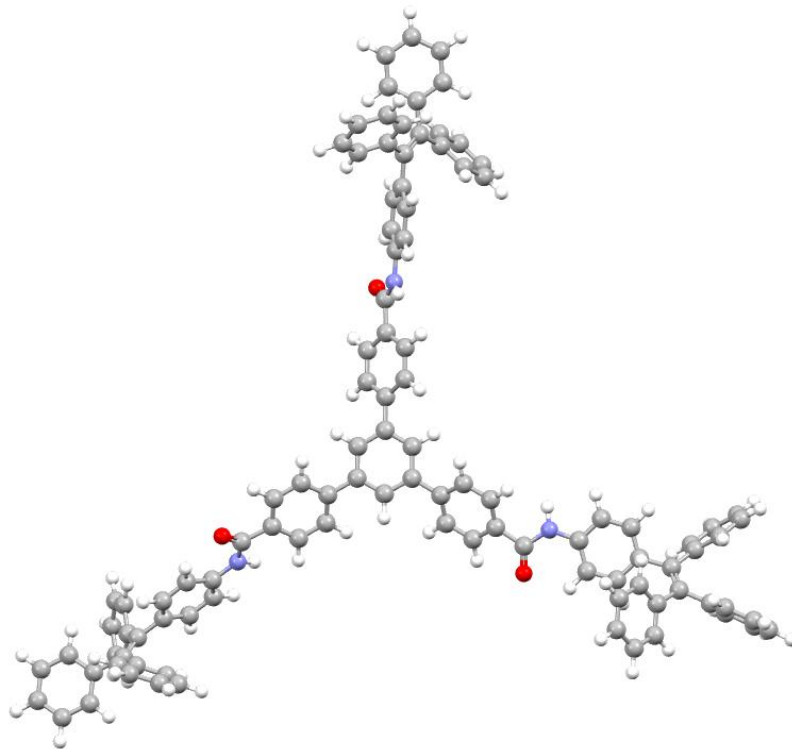

**Figure S10** DFT optimised (B3LYP/6-31g(d,p)) structure of **B3E**.

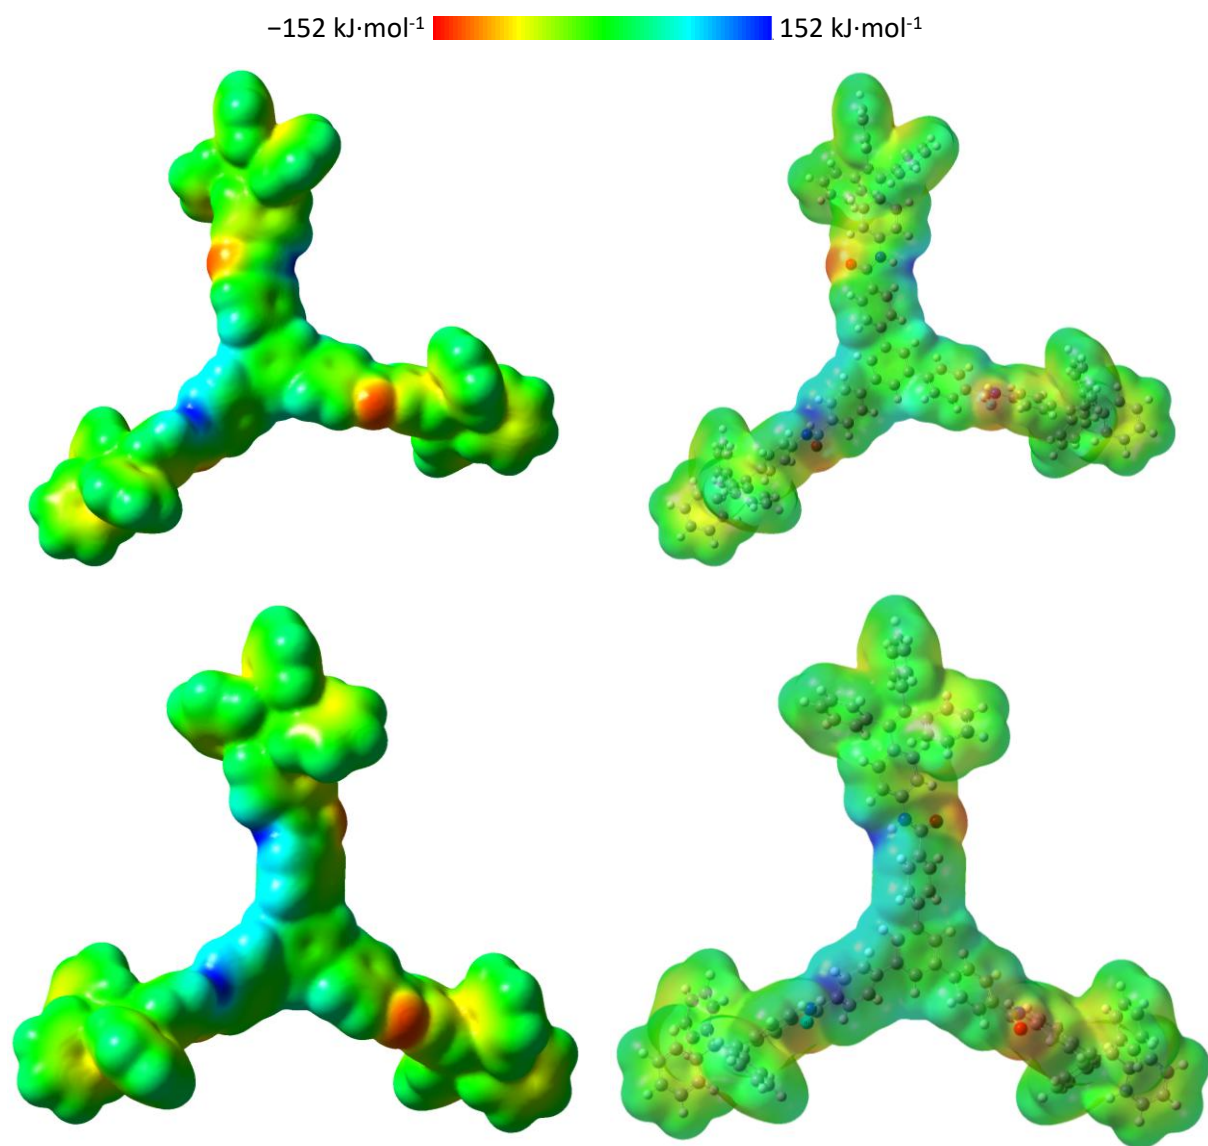

**Figure S11** ESP maps for DFT optimised (B3LYP/6-31g(d,p)) **B3E**. Views from two perspectives are presented.

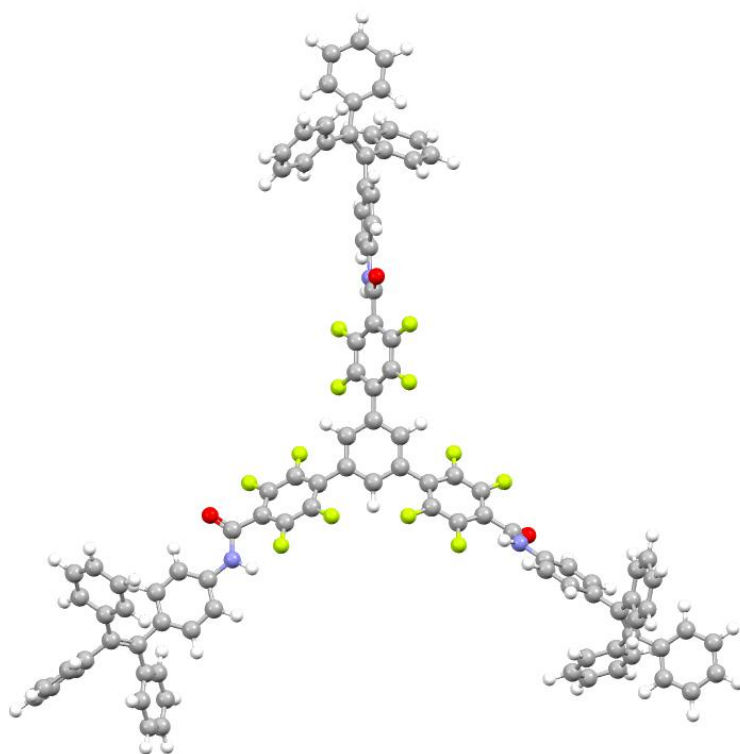

**Figure S12** DFT optimised (B3LYP/6-31g(d,p)) structure of **F-B3E**.

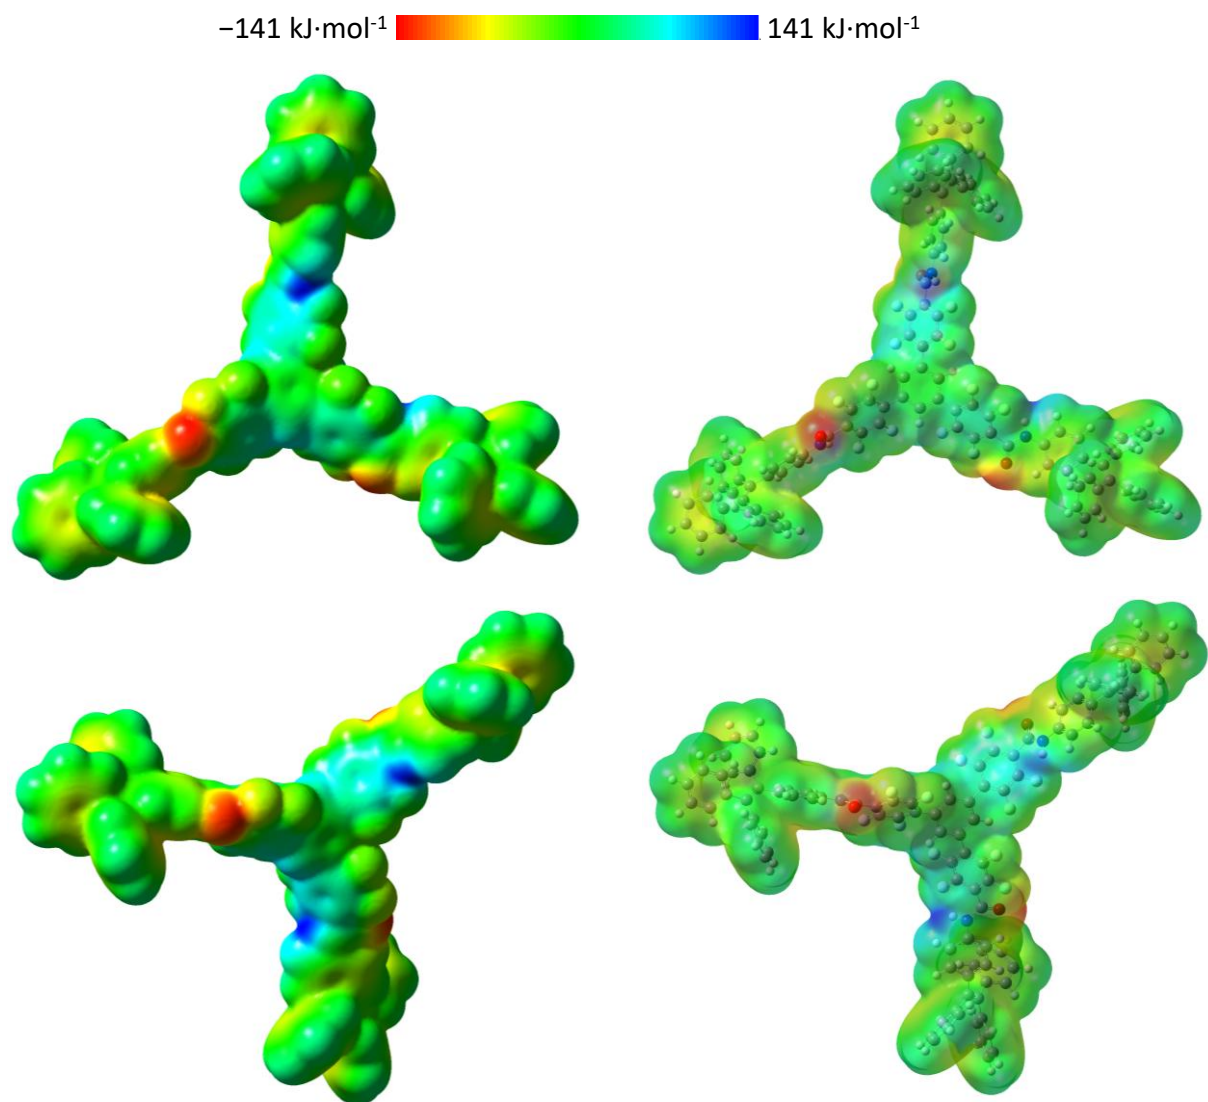

**Figure S13** ESP maps for DFT optimised (B3LYP/6-31g(d,p)) **F-B3E**. Views from two perspectives are presented.

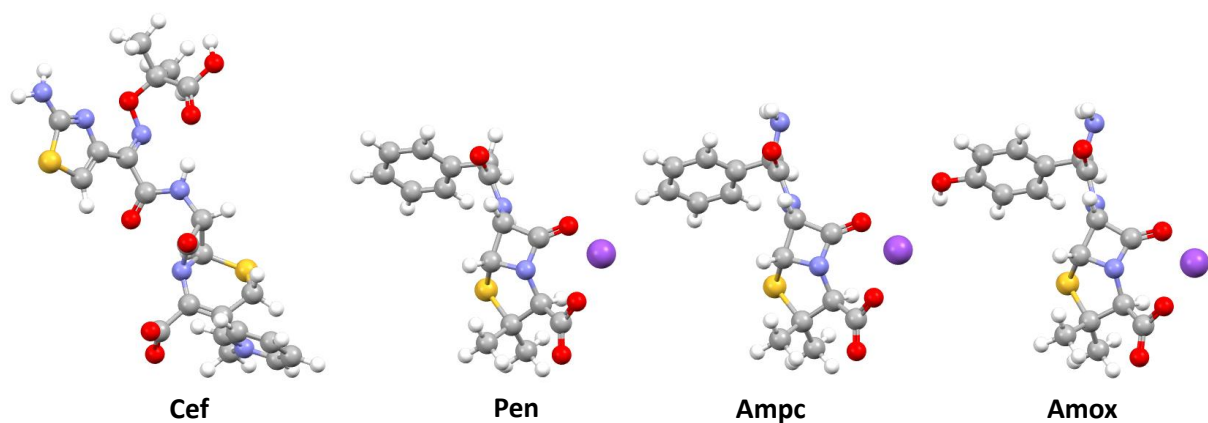

**Figure S14** DFT optimised (B3LYP/6-31g(d,p)) structure of (from left to right): **Cef, Pen, Ampc, Amox**,

-0.27 kJ·mol<sup>-1</sup>  0.27 kJ·mol<sup>-1</sup>

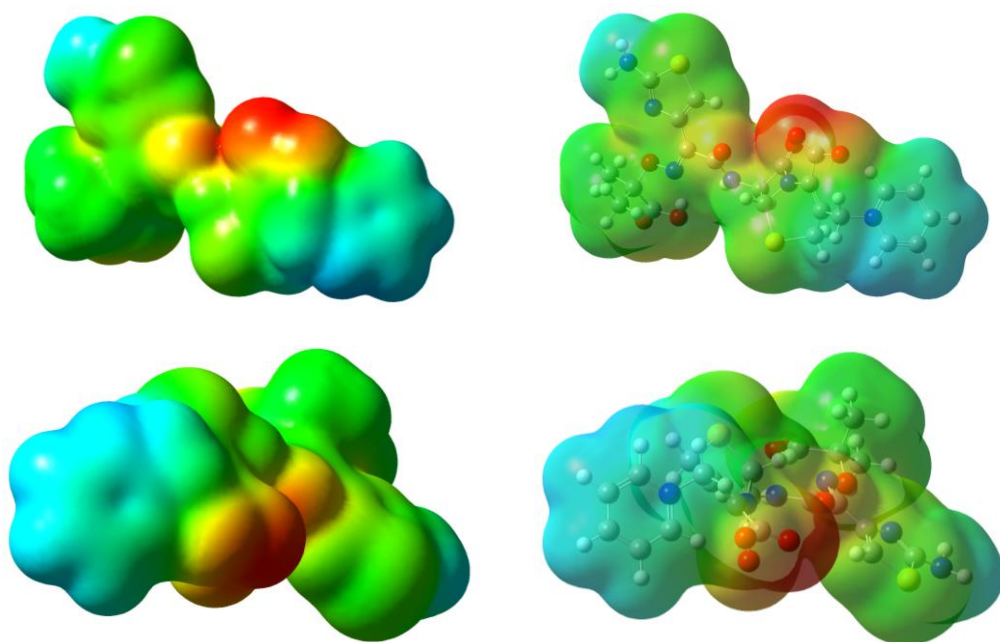

**Figure S15** ESP maps for DFT optimised (B3LYP/6-31g(d,p)) **Cef**. Views from two perspectives are presented.

-0.44 kJ·mol<sup>-1</sup>  0.44 kJ·mol<sup>-1</sup>

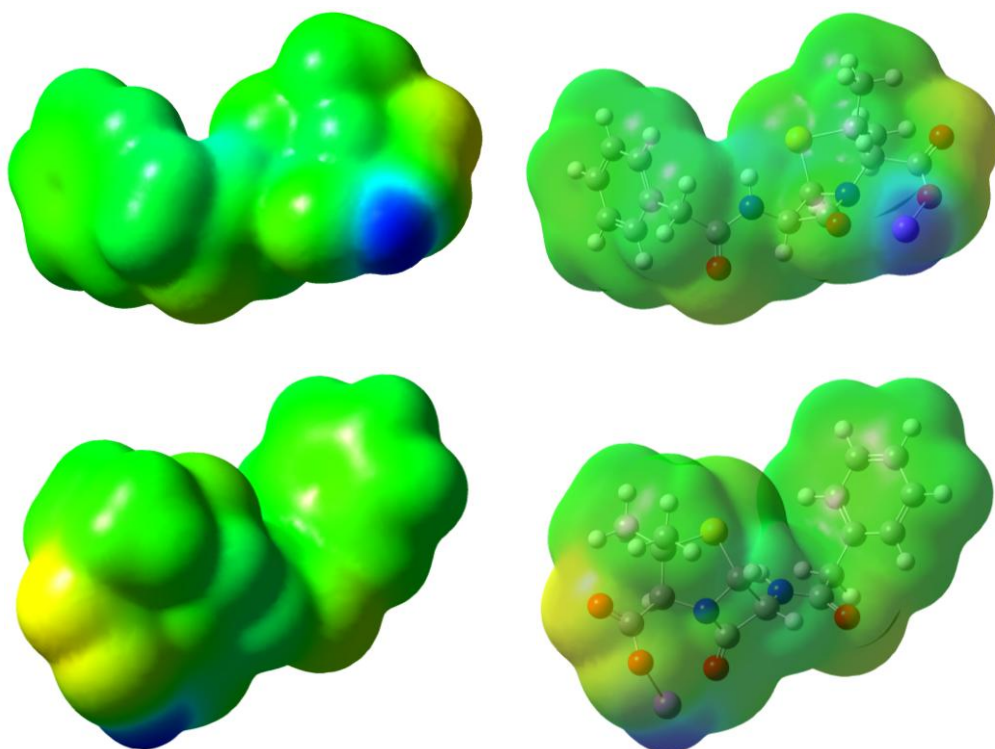

**Figure S16** ESP maps for DFT optimised (B3LYP/6-31g(d,p)) **Pen**. Views from two perspectives are presented.

$-0.43 \text{ kJ}\cdot\text{mol}^{-1}$    $0.43 \text{ kJ}\cdot\text{mol}^{-1}$

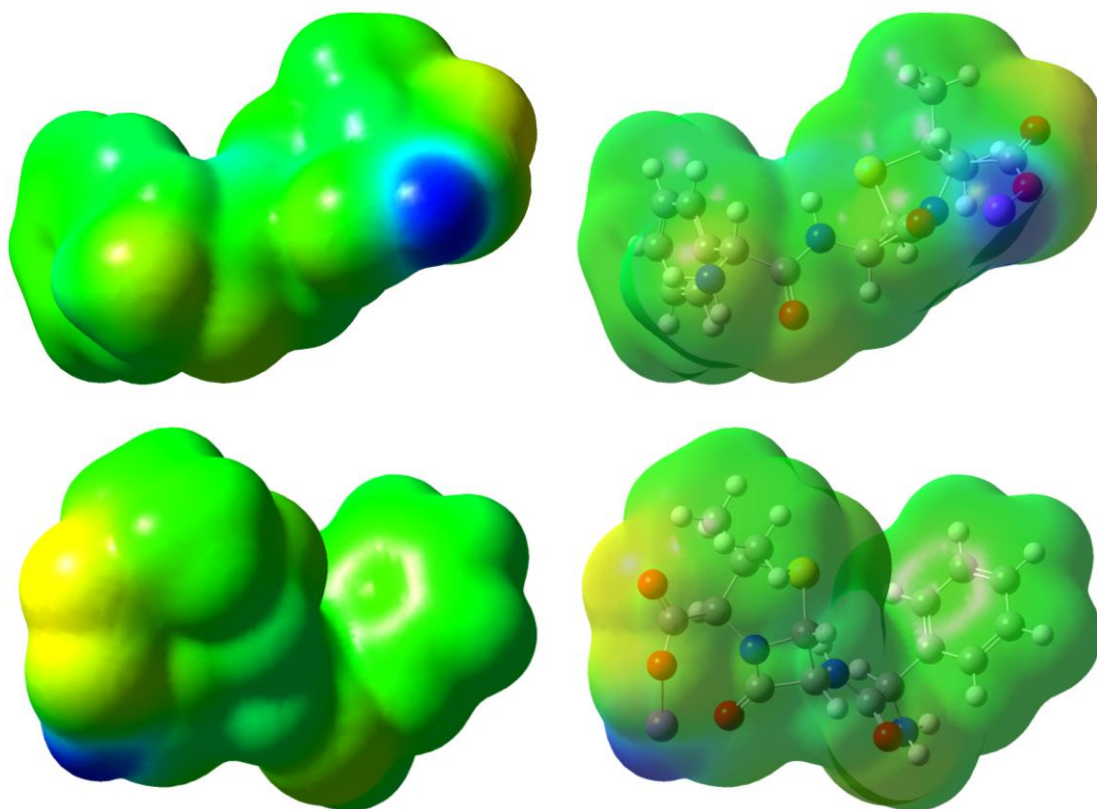

**Figure S17** ESP maps for DFT optimised (B3LYP/6-31g(d,p)) **Ampc**. Views from two perspectives are presented.

-0.43 kJ·mol<sup>-1</sup>  0.43 kJ·mol<sup>-1</sup>

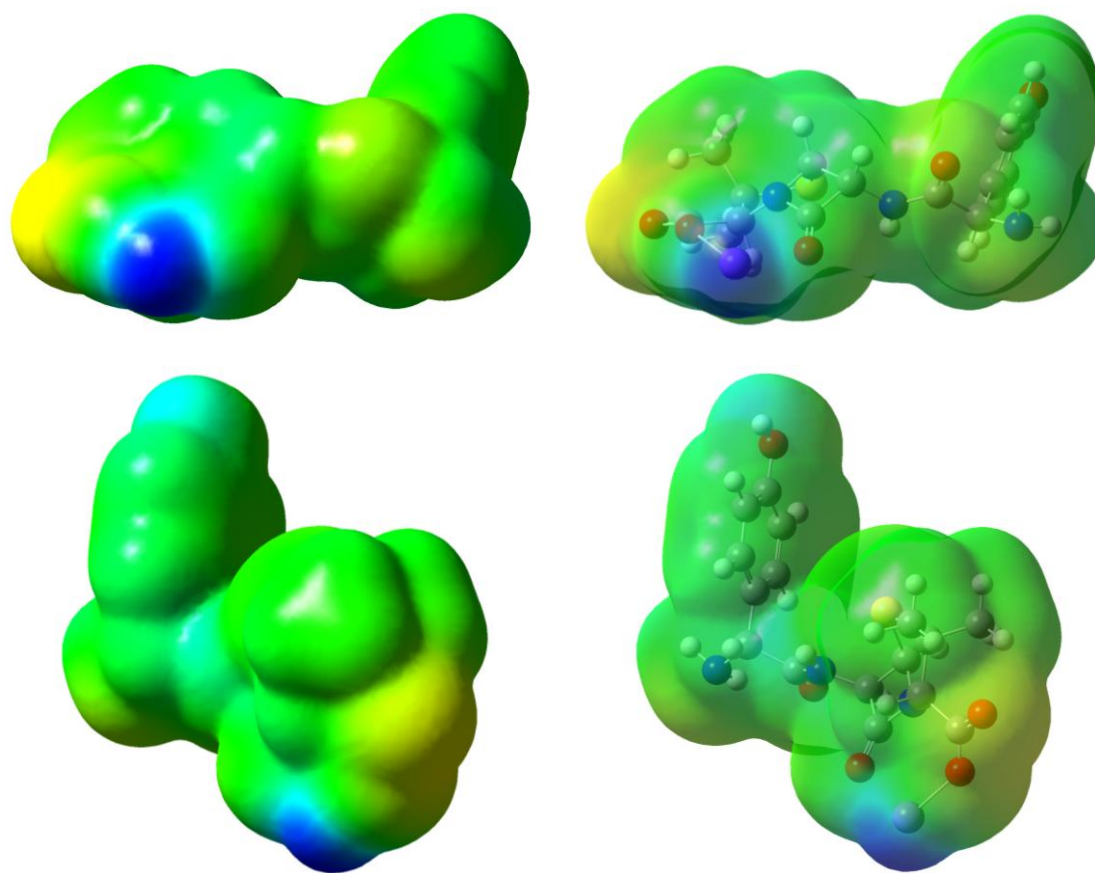

**Figure S18** ESP maps for DFT optimised (B3LYP/6-31g(d,p)) **Amox**. Views from two perspectives are presented.

**Table S3** Number of hydrogen bonding (HB) donors/acceptors for antibiotics computed with ADMET-predictor™ (ver. 11.0) software.

| Compound                       | HB donors | HB acceptors |
|--------------------------------|-----------|--------------|
| Penicillin G sodium salt (Pen) | 1         | 5            |
| Ampicillin sodium salt (Ampc)  | 2         | 6            |
| Amoxicillin sodium salt (Amox) | 3         | 7            |
| Ceftazidime (Cef)              | 3         | 12           |

**Table S4** Atomic coordinates for the DFT optimised (B3LYP/6-31g(d,p)) **B3E**.

|   | x             | y             | z             |
|---|---------------|---------------|---------------|
| C | -0.7189000000 | -0.0641000000 | -0.2996000000 |
| C | 0.1718000000  | 1.0124000000  | -0.1817000000 |
| C | 1.5381000000  | 0.7398000000  | -0.0231000000 |
| C | 2.0196000000  | -0.5764000000 | 0.0178000000  |
| C | 1.1038000000  | -1.6307000000 | -0.1045000000 |
| C | -0.2683000000 | -1.3913000000 | -0.2633000000 |
| C | -1.2210000000 | -2.5216000000 | -0.4080000000 |
| C | 3.4674000000  | -0.8505000000 | 0.2050000000  |
| C | -0.3214000000 | 2.4125000000  | -0.2246000000 |

|   |               |               |               |
|---|---------------|---------------|---------------|
| C | 4.4401000000  | -0.0451000000 | -0.4091000000 |
| C | 5.7975000000  | -0.3044000000 | -0.2404000000 |
| C | 6.2262000000  | -1.3808000000 | 0.5488000000  |
| C | 5.2606000000  | -2.1734000000 | 1.1833000000  |
| C | 3.9062000000  | -1.9179000000 | 1.0082000000  |
| C | -1.5358000000 | 2.7701000000  | 0.3836000000  |
| C | -2.0025000000 | 4.0809000000  | 0.3387000000  |
| C | -1.2673000000 | 5.0789000000  | -0.3163000000 |
| C | -0.0432000000 | 4.7333000000  | -0.9039000000 |
| C | 0.4163000000  | 3.4227000000  | -0.8667000000 |
| C | -0.8834000000 | -3.6646000000 | -1.1542000000 |
| C | -1.7751000000 | -4.7216000000 | -1.2887000000 |
| C | -3.0307000000 | -4.6819000000 | -0.6681000000 |
| C | -3.3815000000 | -3.5390000000 | 0.0640000000  |
| C | -2.4901000000 | -2.4772000000 | 0.1911000000  |
| C | -3.9354000000 | -5.8663000000 | -0.8690000000 |
| N | -4.8902000000 | -6.0403000000 | 0.1099000000  |
| O | -3.8005000000 | -6.6129000000 | -1.8324000000 |
| C | 7.6691000000  | -1.7239000000 | 0.7979000000  |
| N | 8.5450000000  | -1.2959000000 | -0.1764000000 |
| O | 8.0096000000  | -2.3523000000 | 1.7945000000  |
| C | -1.6872000000 | 6.5205000000  | -0.3995000000 |
| O | -0.8642000000 | 7.4127000000  | -0.5748000000 |
| N | -3.0430000000 | 6.7384000000  | -0.2818000000 |
| C | -3.7487000000 | 7.9581000000  | -0.2942000000 |
| C | -5.8892000000 | -7.0295000000 | 0.2067000000  |
| C | 9.9462000000  | -1.4359000000 | -0.2311000000 |
| C | -3.1290000000 | 9.2163000000  | -0.3416000000 |
| C | -3.9120000000 | 10.3671000000 | -0.3340000000 |
| C | -5.3147000000 | 10.3195000000 | -0.2831000000 |
| C | -5.9163000000 | 9.0489000000  | -0.2597000000 |
| C | -5.1507000000 | 7.8907000000  | -0.2526000000 |
| C | -6.6745000000 | -7.0393000000 | 1.3708000000  |
| C | -7.6795000000 | -7.9821000000 | 1.5397000000  |
| C | -7.9581000000 | -8.9358000000 | 0.5449000000  |
| C | -7.1568000000 | -8.9164000000 | -0.6084000000 |
| C | -6.1360000000 | -7.9875000000 | -0.7887000000 |
| C | 10.7152000000 | -1.9861000000 | 0.8060000000  |
| C | 12.0976000000 | -2.0673000000 | 0.6658000000  |
| C | 12.7622000000 | -1.6182000000 | -0.4871000000 |
| C | 11.9712000000 | -1.0923000000 | -1.5237000000 |
| C | 10.5925000000 | -0.9906000000 | -1.3955000000 |
| C | 14.2406000000 | -1.7475000000 | -0.6458000000 |
| C | 14.6800000000 | -2.3193000000 | -1.9561000000 |
| C | 15.1252000000 | -1.3731000000 | 0.3267000000  |

|   |                |                |               |
|---|----------------|----------------|---------------|
| C | 16.5729000000  | -1.7434000000  | 0.2866000000  |
| C | 14.7220000000  | -0.5601000000  | 1.5147000000  |
| C | -9.0216000000  | -9.9630000000  | 0.7486000000  |
| C | -9.9412000000  | -10.2774000000 | -0.2127000000 |
| C | -9.0030000000  | -10.6231000000 | 2.0905000000  |
| C | -10.1419000000 | -9.4472000000  | -1.4397000000 |
| C | -10.8264000000 | -11.4785000000 | -0.1205000000 |
| C | -6.1476000000  | 11.5574000000  | -0.3179000000 |
| C | -7.2857000000  | 11.5171000000  | -1.2876000000 |
| C | -5.8944000000  | 12.6430000000  | 0.4733000000  |
| C | -4.9424000000  | 12.5979000000  | 1.6251000000  |
| C | -6.5481000000  | 13.9697000000  | 0.2562000000  |
| C | -8.5912000000  | 11.8560000000  | -0.8938000000 |
| C | -9.6530000000  | 11.7801000000  | -1.7936000000 |
| C | -9.4332000000  | 11.3647000000  | -3.1081000000 |
| C | -8.1431000000  | 11.0150000000  | -3.5119000000 |
| C | -7.0838000000  | 11.0796000000  | -2.6085000000 |
| C | -7.1036000000  | 14.6766000000  | 1.3375000000  |
| C | -7.6952000000  | 15.9244000000  | 1.1500000000  |
| C | -7.7241000000  | 16.5046000000  | -0.1197000000 |
| C | -7.1566000000  | 15.8249000000  | -1.1988000000 |
| C | -6.5757000000  | 14.5717000000  | -1.0132000000 |
| C | -5.0232000000  | 11.5876000000  | 2.5984000000  |
| C | -4.1560000000  | 11.5735000000  | 3.6893000000  |
| C | -3.1871000000  | 12.5685000000  | 3.8311000000  |
| C | -3.1011000000  | 13.5850000000  | 2.8779000000  |
| C | -3.9766000000  | 13.6056000000  | 1.7937000000  |
| C | 15.1237000000  | -0.9372000000  | 2.8082000000  |
| C | 14.7723000000  | -0.1726000000  | 3.9192000000  |
| C | 14.0310000000  | 0.9996000000   | 3.7593000000  |
| C | 13.6446000000  | 1.3992000000   | 2.4787000000  |
| C | 13.9856000000  | 0.6278000000   | 1.3692000000  |
| C | 15.6625000000  | -1.6856000000  | -2.7354000000 |
| C | 16.0401000000  | -2.2048000000  | -3.9726000000 |
| C | 15.4445000000  | -3.3702000000  | -4.4582000000 |
| C | 14.4594000000  | -4.0061000000  | -3.7000000000 |
| C | 14.0736000000  | -3.4798000000  | -2.4685000000 |
| C | 16.9823000000  | -3.0680000000  | 0.0575000000  |
| C | 18.3334000000  | -3.4100000000  | 0.0572000000  |
| C | 19.3063000000  | -2.4352000000  | 0.2850000000  |
| C | 18.9151000000  | -1.1166000000  | 0.5248000000  |
| C | 17.5635000000  | -0.7773000000  | 0.5370000000  |
| C | -10.3037000000 | -12.7505000000 | 0.1686000000  |
| C | -11.1315000000 | -13.8707000000 | 0.2171000000  |
| C | -12.5011000000 | -13.7447000000 | -0.0215000000 |

|   |               |               |              |
|---|---------------|---------------|--------------|
| C | -13.034000000 | -12.489300000 | -0.320500000 |
| C | -12.204100000 | -11.371300000 | -0.380600000 |
| C | -7.800200000  | -11.113000000 | 2.629200000  |
| C | -7.768900000  | -11.707600000 | 3.889300000  |
| C | -8.936000000  | -11.804800000 | 4.649500000  |
| C | -10.133700000 | -11.303100000 | 4.137100000  |
| C | -10.166900000 | -10.719400000 | 2.871800000  |
| C | -10.211800000 | -10.051000000 | -2.707500000 |
| C | -10.423100000 | -9.287500000  | -3.854100000 |
| C | -10.592900000 | -7.905200000  | -3.756300000 |
| C | -10.548900000 | -7.294300000  | -2.501900000 |
| C | -10.325200000 | -8.056600000  | -1.356700000 |
| H | -1.771100000  | 0.134700000   | -0.475600000 |
| H | 2.229600000   | 1.563000000   | 0.123300000  |
| H | 1.464300000   | -2.653700000  | -0.075300000 |
| H | -4.810100000  | -5.440800000  | 0.917700000  |
| H | 8.126500000   | -0.909200000  | -1.009300000 |
| H | -3.625000000  | 5.913900000   | -0.277000000 |
| H | -2.051800000  | 9.277400000   | -0.395300000 |
| H | -3.418000000  | 11.332100000  | -0.373800000 |
| H | -6.998700000  | 8.969900000   | -0.241000000 |
| H | -5.643800000  | 6.921300000   | -0.220000000 |
| H | -6.490600000  | -6.304700000  | 2.152100000  |
| H | -8.263100000  | -7.977800000  | 2.455000000  |
| H | -7.332900000  | -9.652500000  | -1.385500000 |
| H | -5.523000000  | -8.001100000  | -1.678100000 |
| H | 10.224500000  | -2.350900000  | 1.696500000  |
| H | 12.677700000  | -2.497200000  | 1.475300000  |
| H | 12.445700000  | -0.753800000  | -2.439400000 |
| H | 10.007500000  | -0.566000000  | -2.208800000 |
| H | -8.768700000  | 12.180000000  | 0.126400000  |
| H | -10.654700000 | 12.042900000  | -1.465500000 |
| H | -10.260400000 | 11.307700000  | -3.809500000 |
| H | -7.961400000  | 10.687500000  | -4.531700000 |
| H | -6.085100000  | 10.794800000  | -2.925700000 |
| H | -7.072600000  | 14.237400000  | 2.330000000  |
| H | -8.129700000  | 16.446600000  | 1.997800000  |
| H | -8.178000000  | 17.480600000  | -0.265100000 |
| H | -7.161500000  | 16.273100000  | -2.188400000 |
| H | -6.135000000  | 14.050000000  | -1.856200000 |
| H | -5.774800000  | 10.812000000  | 2.494400000  |
| H | -4.239900000  | 10.785400000  | 4.432300000  |
| H | -2.509600000  | 12.555600000  | 4.679800000  |
| H | -2.353400000  | 14.366300000  | 2.980500000  |
| H | -3.912700000  | 14.406300000  | 1.063100000  |

|   |                |                |               |
|---|----------------|----------------|---------------|
| H | 15.7113000000  | -1.8410000000  | 2.9385000000  |
| H | 15.0815000000  | -0.4907000000  | 4.9108000000  |
| H | 13.7626000000  | 1.5995000000   | 4.6240000000  |
| H | 13.0788000000  | 2.3164000000   | 2.3420000000  |
| H | 13.6830000000  | 0.9442000000   | 0.3764000000  |
| H | 16.1295000000  | -0.7796000000  | -2.3637000000 |
| H | 16.7989000000  | -1.6954000000  | -4.5598000000 |
| H | 15.7404000000  | -3.7757000000  | -5.4214000000 |
| H | 13.9870000000  | -4.9118000000  | -4.0698000000 |
| H | 13.2983000000  | -3.9724000000  | -1.8894000000 |
| H | 16.2315000000  | -3.8311000000  | -0.1186000000 |
| H | 18.6259000000  | -4.4416000000  | -0.1170000000 |
| H | 20.3592000000  | -2.7020000000  | 0.2833000000  |
| H | 19.6636000000  | -0.3508000000  | 0.7081000000  |
| H | 17.2659000000  | 0.2475000000   | 0.7377000000  |
| H | -9.2398000000  | -12.8562000000 | 0.3531000000  |
| H | -10.7041000000 | -14.8448000000 | 0.4372000000  |
| H | -13.1461000000 | -14.6177000000 | 0.0177000000  |
| H | -14.0978000000 | -12.3805000000 | -0.5125000000 |
| H | -12.6232000000 | -10.4004000000 | -0.6271000000 |
| H | -6.8865000000  | -11.0299000000 | 2.0483000000  |
| H | -6.8307000000  | -12.0920000000 | 4.2797000000  |
| H | -8.9110000000  | -12.2615000000 | 5.6346000000  |
| H | -11.0452000000 | -11.3626000000 | 4.7250000000  |
| H | -11.1011000000 | -10.3316000000 | 2.4793000000  |
| H | -10.0934000000 | -11.1272000000 | -2.7895000000 |
| H | -10.4593000000 | -9.7735000000  | -4.8249000000 |
| H | -10.7644000000 | -7.3105000000  | -4.6488000000 |
| H | -10.6929000000 | -6.2212000000  | -2.4133000000 |
| H | -10.2929000000 | -7.5761000000  | -0.3844000000 |
| H | 3.1760000000   | -2.5349000000  | 1.5228000000  |
| H | 5.5989000000   | -2.9819000000  | 1.8219000000  |
| H | 6.5164000000   | 0.3634000000   | -0.7073000000 |
| H | 4.1304000000   | 0.7838000000   | -1.0379000000 |
| H | 1.3491000000   | 3.1701000000   | -1.3611000000 |
| H | 0.5301000000   | 5.5130000000   | -1.3931000000 |
| H | -2.9220000000  | 4.3241000000   | 0.8643000000  |
| H | -2.1022000000  | 2.0212000000   | 0.9282000000  |
| H | 0.0780000000   | -3.7100000000  | -1.6563000000 |
| H | -1.5236000000  | -5.5925000000  | -1.8839000000 |
| H | -4.3651000000  | -3.4503000000  | 0.5173000000  |
| H | -2.7758000000  | -1.6087000000  | 0.7765000000  |

**Table S5** Atomic coordinates for the DFT optimised (B3LYP/6-31g(d,p)) **F-B3E**.

|   | x             | y              | z             |
|---|---------------|----------------|---------------|
| C | 0.8375000000  | -0.0127000000  | -0.2685000000 |
| C | -0.0041000000 | -1.1250000000  | -0.1398000000 |
| C | -1.3797000000 | -0.9248000000  | 0.0333000000  |
| C | -1.9150000000 | 0.3685000000   | 0.0840000000  |
| C | -1.0588000000 | 1.4689000000   | -0.0493000000 |
| C | 0.3185000000  | 1.2878000000   | -0.2287000000 |
| C | 1.2182000000  | 2.4606000000   | -0.3776000000 |
| C | -3.3741000000 | 0.5707000000   | 0.2768000000  |
| C | 0.5542000000  | -2.5009000000  | -0.1843000000 |
| C | -4.3280000000 | -0.2069000000  | -0.3927000000 |
| C | -5.6915000000 | -0.0127000000  | -0.2101000000 |
| C | -6.2029000000 | 0.9645000000   | 0.6493000000  |
| C | -5.2538000000 | 1.7480000000   | 1.3200000000  |
| C | -3.8875000000 | 1.5545000000   | 1.1320000000  |
| C | 1.7479000000  | -2.8438000000  | 0.4640000000  |
| C | 2.2621000000  | -4.1336000000  | 0.4202000000  |
| C | 1.6275000000  | -5.1730000000  | -0.2669000000 |
| C | 0.4351000000  | -4.8355000000  | -0.9220000000 |
| C | -0.0754000000 | -3.5404000000  | -0.8822000000 |
| C | 0.8743000000  | 3.5748000000   | -1.1546000000 |
| C | 1.7144000000  | 4.6756000000   | -1.3039000000 |
| C | 2.9639000000  | 4.7341000000   | -0.6714000000 |
| C | 3.3046000000  | 3.6261000000   | 0.1105000000  |
| C | 2.4664000000  | 2.5277000000   | 0.2552000000  |
| C | 3.8806000000  | 5.9133000000   | -0.9334000000 |
| N | 4.6553000000  | 6.2836000000   | 0.1357000000  |
| O | 3.8762000000  | 6.4710000000   | -2.0202000000 |
| C | -7.6771000000 | 1.1552000000   | 0.9491000000  |
| N | -8.5076000000 | 0.9609000000   | -0.1245000000 |
| O | -8.0445000000 | 1.4802000000   | 2.0679000000  |
| C | 2.0980000000  | -6.6145000000  | -0.2658000000 |
| O | 1.2886000000  | -7.5294000000  | -0.2762000000 |
| N | 3.4602000000  | -6.7716000000  | -0.2787000000 |
| C | 4.2044000000  | -7.9708000000  | -0.2778000000 |
| C | 5.6020000000  | 7.3274000000   | 0.2124000000  |
| C | -9.9144000000 | 1.0628000000   | -0.1749000000 |
| C | 3.6285000000  | -9.2489000000  | -0.3327000000 |
| C | 4.4521000000  | -10.3711000000 | -0.3314000000 |
| C | 5.8520000000  | -10.2732000000 | -0.2794000000 |
| C | 6.4085000000  | -8.9822000000  | -0.2492000000 |
| C | 5.6027000000  | -7.8519000000  | -0.2370000000 |
| C | 6.3121000000  | 7.4555000000   | 1.4167000000  |

|   |                |                |               |
|---|----------------|----------------|---------------|
| C | 7.2499000000   | 8.4659000000   | 1.5799000000  |
| C | 7.5321000000   | 9.3725000000   | 0.5427000000  |
| C | 6.8029000000   | 9.2356000000   | -0.6497000000 |
| C | 5.8501000000   | 8.2363000000   | -0.8271000000 |
| C | -10.7098000000 | 1.4544000000   | 0.9123000000  |
| C | -12.0913000000 | 1.5288000000   | 0.7577000000  |
| C | -12.7265000000 | 1.2266000000   | -0.4576000000 |
| C | -11.9082000000 | 0.8594000000   | -1.5405000000 |
| C | -10.5301000000 | 0.7673000000   | -1.4015000000 |
| C | -14.2046000000 | 1.3497000000   | -0.6259000000 |
| C | -14.6330000000 | 2.0880000000   | -1.8540000000 |
| C | -15.0969000000 | 0.8286000000   | 0.2688000000  |
| C | -16.5512000000 | 1.1733000000   | 0.2514000000  |
| C | -14.6959000000 | -0.1321000000  | 1.3417000000  |
| C | 8.5234000000   | 10.4710000000  | 0.7386000000  |
| C | 9.4774000000   | 10.7810000000  | -0.1900000000 |
| C | 8.3927000000   | 11.2057000000  | 2.0347000000  |
| C | 9.7913000000   | 9.8937000000   | -1.3515000000 |
| C | 10.2910000000  | 12.0333000000  | -0.1239000000 |
| C | 6.7285000000   | -11.4808000000 | -0.3193000000 |
| C | 7.8634000000   | -11.3963000000 | -1.2897000000 |
| C | 6.5141000000   | -12.5767000000 | 0.4690000000  |
| C | 5.5614000000   | -12.5682000000 | 1.6210000000  |
| C | 7.2149000000   | -13.8785000000 | 0.2485000000  |
| C | 9.1805000000   | -11.6894000000 | -0.8980000000 |
| C | 10.2380000000  | -11.5727000000 | -1.7984000000 |
| C | 10.0022000000  | -11.1612000000 | -3.1114000000 |
| C | 8.7001000000   | -10.8568000000 | -3.5131000000 |
| C | 7.6446000000   | -10.9623000000 | -2.6091000000 |
| C | 7.7948000000   | -14.5680000000 | 1.3281000000  |
| C | 8.4300000000   | -15.7937000000 | 1.1374000000  |
| C | 8.4792000000   | -16.3692000000 | -0.1337000000 |
| C | 7.8882000000   | -15.7073000000 | -1.2113000000 |
| C | 7.2637000000   | -14.4756000000 | -1.0226000000 |
| C | 5.6074000000   | -11.5589000000 | 2.5975000000  |
| C | 4.7394000000   | -11.5777000000 | 3.6878000000  |
| C | 3.8048000000   | -12.6054000000 | 3.8254000000  |
| C | 3.7541000000   | -13.6213000000 | 2.8690000000  |
| C | 4.6306000000   | -13.6090000000 | 1.7856000000  |
| C | -15.1256000000 | 0.0574000000   | 2.6669000000  |
| C | -14.7759000000 | -0.8455000000  | 3.6693000000  |
| C | -14.0084000000 | -1.9713000000  | 3.3644000000  |
| C | -13.5940000000 | -2.1851000000  | 2.0486000000  |
| C | -13.9333000000 | -1.2753000000  | 1.0487000000  |
| C | -15.5876000000 | 1.5488000000   | -2.7327000000 |

|   |                |                |               |
|---|----------------|----------------|---------------|
| C | -15.9545000000 | 2.2261000000   | -3.8944000000 |
| C | -15.3758000000 | 3.4585000000   | -4.2030000000 |
| C | -14.4185000000 | 4.0028000000   | -3.3447000000 |
| C | -14.0432000000 | 3.3195000000   | -2.1894000000 |
| C | -16.9847000000 | 2.5088000000   | 0.1968000000  |
| C | -18.3426000000 | 2.8221000000   | 0.2176000000  |
| C | -19.2981000000 | 1.8071000000   | 0.2922000000  |
| C | -18.8829000000 | 0.4756000000   | 0.3575000000  |
| C | -17.5248000000 | 0.1634000000   | 0.3490000000  |
| C | 9.6867000000   | 13.2883000000  | 0.0611000000  |
| C | 10.4503000000  | 14.4540000000  | 0.0851000000  |
| C | 11.8357000000  | 14.3912000000  | -0.0741000000 |
| C | 12.4499000000  | 13.1526000000  | -0.2694000000 |
| C | 11.6846000000  | 11.9884000000  | -0.3054000000 |
| C | 7.1370000000   | 11.6591000000  | 2.4758000000  |
| C | 7.0021000000   | 12.3228000000  | 3.6940000000  |
| C | 8.1168000000   | 12.5278000000  | 4.5094000000  |
| C | 9.3665000000   | 12.0641000000  | 4.0947000000  |
| C | 9.5030000000   | 11.4109000000  | 2.8709000000  |
| C | 9.8946000000   | 10.4255000000  | -2.6489000000 |
| C | 10.2092000000  | 9.6100000000   | -3.7343000000 |
| C | 10.4511000000  | 8.2483000000   | -3.5431000000 |
| C | 10.3751000000  | 7.7104000000   | -2.2572000000 |
| C | 10.0481000000  | 8.5238000000   | -1.1737000000 |
| F | 1.2733000000   | 5.6843000000   | -2.0554000000 |
| F | -0.3044000000  | 3.6075000000   | -1.7991000000 |
| F | 4.4785000000   | 3.5987000000   | 0.7804000000  |
| F | 2.8887000000   | 1.5187000000   | 1.0362000000  |
| F | 2.4278000000   | -1.9240000000  | 1.1699000000  |
| F | 3.4233000000   | -4.3577000000  | 1.0752000000  |
| F | -0.2345000000  | -5.7354000000  | -1.6424000000 |
| F | -1.2103000000  | -3.3031000000  | -1.5602000000 |
| F | -3.0511000000  | 2.3539000000   | 1.8159000000  |
| F | -5.6257000000  | 2.7258000000   | 2.1464000000  |
| F | -3.9424000000  | -1.1689000000  | -1.2477000000 |
| F | -6.5280000000  | -0.8015000000  | -0.9205000000 |
| H | 1.9001000000   | -0.1595000000  | -0.4044000000 |
| H | -2.0353000000  | -1.7790000000  | 0.1331000000  |
| H | -1.4660000000  | 2.4697000000   | -0.0139000000 |
| H | 4.6068000000   | 5.6920000000   | 0.9526000000  |
| H | -8.0742000000  | 0.6295000000   | -0.9741000000 |
| H | 4.0110000000   | -5.9291000000  | -0.1992000000 |
| H | 2.5541000000   | -9.3506000000  | -0.3772000000 |
| H | 3.9930000000   | -11.3529000000 | -0.3752000000 |
| H | 7.4874000000   | -8.8652000000  | -0.2296000000 |

|   |                |                |               |
|---|----------------|----------------|---------------|
| H | 6.0603000000   | -6.8657000000  | -0.2014000000 |
| H | 6.1226000000   | 6.7609000000   | 2.2322000000  |
| H | 7.7776000000   | 8.5527000000   | 2.5244000000  |
| H | 6.9829000000   | 9.9320000000   | -1.4615000000 |
| H | 5.2998000000   | 8.1542000000   | -1.7530000000 |
| H | -10.2444000000 | 1.6962000000   | 1.8566000000  |
| H | -12.6937000000 | 1.8341000000   | 1.6065000000  |
| H | -12.3607000000 | 0.6386000000   | -2.5020000000 |
| H | -9.9224000000  | 0.4695000000   | -2.2532000000 |
| H | 9.3705000000   | -12.0100000000 | 0.1210000000  |
| H | 11.2487000000  | -11.8004000000 | -1.4720000000 |
| H | 10.8262000000  | -11.0723000000 | -3.8133000000 |
| H | 8.5058000000   | -10.5328000000 | -4.5317000000 |
| H | 6.6360000000   | -10.7130000000 | -2.9250000000 |
| H | 7.7482000000   | -14.1328000000 | 2.3218000000  |
| H | 8.8826000000   | -16.3024000000 | 1.9839000000  |
| H | 8.9670000000   | -17.3283000000 | -0.2816000000 |
| H | 7.9088000000   | -16.1525000000 | -2.2019000000 |
| H | 6.8050000000   | -13.9676000000 | -1.8643000000 |
| H | 6.3326000000   | -10.7580000000 | 2.4970000000  |
| H | 4.7960000000   | -10.7896000000 | 4.4333000000  |
| H | 3.1265000000   | -12.6181000000 | 4.6735000000  |
| H | 3.0332000000   | -14.4279000000 | 2.9687000000  |
| H | 4.5946000000   | -14.4092000000 | 1.0525000000  |
| H | -15.7337000000 | 0.9239000000   | 2.9086000000  |
| H | -15.1069000000 | -0.6717000000  | 4.6893000000  |
| H | -13.7414000000 | -2.6788000000  | 4.1439000000  |
| H | -13.0078000000 | -3.0646000000  | 1.7983000000  |
| H | -13.6093000000 | -1.4479000000  | 0.0276000000  |
| H | -16.0412000000 | 0.5914000000   | -2.4986000000 |
| H | -16.6914000000 | 1.7879000000   | -4.5614000000 |
| H | -15.6634000000 | 3.9868000000   | -5.1073000000 |
| H | -13.9596000000 | 4.9597000000   | -3.5770000000 |
| H | -13.2896000000 | 3.7430000000   | -1.5323000000 |
| H | -16.2477000000 | 3.3029000000   | 0.1404000000  |
| H | -18.6543000000 | 3.8621000000   | 0.1800000000  |
| H | -20.3562000000 | 2.0517000000   | 0.3069000000  |
| H | -19.6179000000 | -0.3219000000  | 0.4204000000  |
| H | -17.2087000000 | -0.8734000000  | 0.4138000000  |
| H | 8.6102000000   | 13.3449000000  | 0.1837000000  |
| H | 9.9607000000   | 15.4136000000  | 0.2240000000  |
| H | 12.4305000000  | 15.2998000000  | -0.0540000000 |
| H | 13.5268000000  | 13.0927000000  | -0.3991000000 |
| H | 12.1673000000  | 11.0300000000  | -0.4713000000 |
| H | 6.2639000000   | 11.4928000000  | 1.8519000000  |

|   |              |              |              |
|---|--------------|--------------|--------------|
| H | 6.024400000  | 12.676800000 | 4.008400000  |
| H | 8.011200000  | 13.038400000 | 5.462100000  |
| H | 10.238100000 | 12.207700000 | 4.726900000  |
| H | 10.477100000 | 11.053200000 | 2.554300000  |
| H | 9.720500000  | 11.486200000 | -2.802700000 |
| H | 10.269600000 | 10.039500000 | -4.730300000 |
| H | 10.703000000 | 7.613600000  | -4.387700000 |
| H | 10.574500000 | 6.654800000  | -2.095700000 |
| H | 9.991700000  | 8.100000000  | -0.176400000 |

**Table S6** Atomic coordinates for the DFT optimised (B3LYP/6-31g(d,p)) Cef.

|   | x            | y            | z            |
|---|--------------|--------------|--------------|
| C | 1.188700000  | -0.169400000 | 0.154400000  |
| C | 2.667500000  | -0.537200000 | -0.016100000 |
| C | 3.125000000  | -0.244000000 | -1.449800000 |
| C | 3.511100000  | 0.295100000  | 1.003500000  |
| O | 4.219000000  | -0.158500000 | 1.898300000  |
| O | 3.430800000  | 1.641700000  | 0.827300000  |
| O | 2.710900000  | -1.956200000 | 0.175300000  |
| N | 4.023900000  | -2.382300000 | 0.375300000  |
| C | 4.144800000  | -3.220500000 | 1.370500000  |
| C | 3.060800000  | -3.805300000 | 2.174000000  |
| C | 3.255300000  | -4.793200000 | 3.128000000  |
| S | 1.776600000  | -5.204300000 | 3.887600000  |
| C | 0.970000000  | -4.046900000 | 2.919500000  |
| N | 1.725600000  | -3.398900000 | 2.072100000  |
| N | -0.353100000 | -3.845000000 | 3.023800000  |
| C | 5.593500000  | -3.464600000 | 1.787800000  |
| O | 6.077200000  | -4.581900000 | 1.749300000  |
| N | 6.213500000  | -2.311400000 | 2.227300000  |
| C | 7.510000000  | -2.273100000 | 2.950200000  |
| C | 8.679600000  | -3.188400000 | 2.495600000  |
| N | 8.426600000  | -4.022300000 | 3.693400000  |
| C | 7.596500000  | -3.080100000 | 4.262100000  |
| O | 7.260100000  | -2.867400000 | 5.408400000  |
| C | 9.493200000  | -4.540700000 | 4.397200000  |
| C | 10.563300000 | -3.787400000 | 4.729500000  |
| C | 10.709400000 | -2.391400000 | 4.217100000  |
| S | 10.291100000 | -2.288900000 | 2.463200000  |
| C | 11.625300000 | -4.287600000 | 5.678000000  |
| N | 11.543500000 | -3.545200000 | 6.968400000  |
| C | 10.445700000 | -3.683700000 | 7.753400000  |

|   |               |               |               |
|---|---------------|---------------|---------------|
| C | 10.3527000000 | -3.0083000000 | 8.9653000000  |
| C | 11.3997000000 | -2.1963000000 | 9.3777000000  |
| C | 12.5234000000 | -2.0772000000 | 8.5710000000  |
| C | 12.5756000000 | -2.7685000000 | 7.3648000000  |
| C | 9.4553000000  | -5.9835000000 | 4.9723000000  |
| O | 10.2125000000 | -6.7885000000 | 4.3617000000  |
| O | 8.9579000000  | -6.0597000000 | 6.1311000000  |
| H | 0.9877000000  | 0.8832000000  | -0.0675000000 |
| H | 0.8621000000  | -0.3636000000 | 1.1831000000  |
| H | 0.5548000000  | -0.7829000000 | -0.4964000000 |
| H | 2.9498000000  | 0.7972000000  | -1.7380000000 |
| H | 2.6057000000  | -0.8908000000 | -2.1662000000 |
| H | 4.1971000000  | -0.4412000000 | -1.5645000000 |
| H | 2.8565000000  | 1.9362000000  | 0.0971000000  |
| H | 4.1708000000  | -5.2938000000 | 3.4158000000  |
| H | -0.9083000000 | -4.5922000000 | 3.4219000000  |
| H | -0.7830000000 | -3.3827000000 | 2.2317000000  |
| H | 5.6331000000  | -1.4651000000 | 2.1966000000  |
| H | 7.7838000000  | -1.2221000000 | 3.1118000000  |
| H | 8.5031000000  | -3.7417000000 | 1.5676000000  |
| H | 11.7481000000 | -2.0567000000 | 4.3065000000  |
| H | 10.0984000000 | -1.6955000000 | 4.8017000000  |
| H | 12.6171000000 | -4.1244000000 | 5.2405000000  |
| H | 11.5850000000 | -5.3445000000 | 5.9517000000  |
| H | 9.6398000000  | -4.3229000000 | 7.4085000000  |
| H | 9.4602000000  | -3.1242000000 | 9.5762000000  |
| H | 11.3381000000 | -1.6642000000 | 10.3249000000 |
| H | 13.3561000000 | -1.4512000000 | 8.8814000000  |
| H | 13.4389000000 | -2.7044000000 | 6.7100000000  |

**Table S7** Atomic coordinates for the DFT optimised (B3LYP/6-31g(d,p)) Pen.

|   | x             | y             | z             |
|---|---------------|---------------|---------------|
| C | 2.8570000000  | 2.8154000000  | 1.2054000000  |
| C | 2.4520000000  | 1.9198000000  | 0.0341000000  |
| C | 2.9642000000  | 0.4635000000  | 0.2394000000  |
| N | 1.9976000000  | -0.4001000000 | -0.4724000000 |
| C | 0.7611000000  | 0.2206000000  | -0.9904000000 |
| S | 0.5554000000  | 1.7334000000  | 0.0168000000  |
| C | -0.0001000000 | -1.0968000000 | -0.6199000000 |
| C | 1.3671000000  | -1.5214000000 | -0.0233000000 |
| O | 1.7726000000  | -2.4683000000 | 0.6502000000  |
| N | -1.1063000000 | -1.0161000000 | 0.2832000000  |
| C | -2.2865000000 | -1.6784000000 | 0.0408000000  |
| O | -2.4426000000 | -2.4110000000 | -0.9265000000 |

|    |               |               |               |
|----|---------------|---------------|---------------|
| C  | -3.3996000000 | -1.4074000000 | 1.0516000000  |
| C  | -4.3896000000 | -0.3734000000 | 0.5379000000  |
| C  | -4.6051000000 | 0.8181000000  | 1.2386000000  |
| C  | -5.5184000000 | 1.7647000000  | 0.7702000000  |
| C  | -6.2243000000 | 1.5302000000  | -0.4092000000 |
| C  | -6.0116000000 | 0.3447000000  | -1.1170000000 |
| C  | -5.1016000000 | -0.6013000000 | -0.6481000000 |
| C  | 4.4767000000  | 0.1683000000  | -0.0808000000 |
| O  | 5.2690000000  | 1.1100000000  | -0.0085000000 |
| C  | 2.9088000000  | 2.5282000000  | -1.2994000000 |
| O  | 4.7236000000  | -1.0663000000 | -0.2849000000 |
| Na | 3.9584000000  | -2.8545000000 | 0.4464000000  |
| H  | 2.4756000000  | 2.4321000000  | 2.1570000000  |
| H  | 2.4847000000  | 3.8349000000  | 1.0675000000  |
| H  | 3.9493000000  | 2.8391000000  | 1.2437000000  |
| H  | 2.8583000000  | 0.2248000000  | 1.3080000000  |
| H  | 0.7930000000  | 0.4559000000  | -2.0563000000 |
| H  | -0.3229000000 | -1.6919000000 | -1.4779000000 |
| H  | -1.0352000000 | -0.3794000000 | 1.0648000000  |
| H  | -2.9865000000 | -1.0851000000 | 2.0129000000  |
| H  | -3.9025000000 | -2.3663000000 | 1.2124000000  |
| H  | -4.0600000000 | 1.0065000000  | 2.1605000000  |
| H  | -5.6753000000 | 2.6838000000  | 1.3274000000  |
| H  | -6.9353000000 | 2.2649000000  | -0.7753000000 |
| H  | -6.5566000000 | 0.1558000000  | -2.0374000000 |
| H  | -4.9248000000 | -1.5171000000 | -1.2035000000 |
| H  | 3.9978000000  | 2.6087000000  | -1.2874000000 |
| H  | 2.4667000000  | 3.5185000000  | -1.4350000000 |
| H  | 2.6251000000  | 1.9093000000  | -2.1560000000 |

**Table S8** Atomic coordinates for the DFT optimized (B3LYP/6-31g(d,p)) Ampc.

|   | x             | y             | z             |
|---|---------------|---------------|---------------|
| C | 2.9758000000  | 2.7416000000  | 1.3433000000  |
| C | 2.5850000000  | 1.9098000000  | 0.1212000000  |
| C | 3.0644000000  | 0.4358000000  | 0.2706000000  |
| N | 2.1021000000  | -0.3736000000 | -0.5077000000 |
| C | 0.8911000000  | 0.2951000000  | -1.0260000000 |
| S | 0.6862000000  | 1.7616000000  | 0.0475000000  |
| C | 0.0974000000  | -1.0241000000 | -0.7414000000 |
| C | 1.4408000000  | -1.5036000000 | -0.1305000000 |
| O | 1.8100000000  | -2.4890000000 | 0.5062000000  |
| N | -1.0303000000 | -0.9651000000 | 0.1374000000  |
| C | -2.2023000000 | -1.6134000000 | -0.1429000000 |
| O | -2.3507000000 | -2.3241000000 | -1.1299000000 |

|    |              |              |              |
|----|--------------|--------------|--------------|
| C  | -3.351500000 | -1.347400000 | 0.843600000  |
| C  | -4.107500000 | -0.091100000 | 0.401300000  |
| C  | -4.211100000 | 1.012000000  | 1.255100000  |
| C  | -4.922600000 | 2.149700000  | 0.867300000  |
| C  | -5.536700000 | 2.195200000  | -0.383600000 |
| C  | -5.436100000 | 1.098700000  | -1.244600000 |
| C  | -4.728100000 | -0.036500000 | -0.855700000 |
| N  | -4.148300000 | -2.569800000 | 0.920500000  |
| C  | 4.579200000  | 0.124800000  | -0.022700000 |
| O  | 5.386900000  | 1.046800000  | 0.108300000  |
| C  | 3.087900000  | 2.570500000  | -1.170100000 |
| O  | 4.807600000  | -1.105200000 | -0.271300000 |
| Na | 3.993700000  | -2.910000000 | 0.362400000  |
| H  | 2.562500000  | 2.322000000  | 2.265800000  |
| H  | 2.626500000  | 3.773600000  | 1.244300000  |
| H  | 4.066900000  | 2.741700000  | 1.410300000  |
| H  | 2.924000000  | 0.149100000  | 1.323300000  |
| H  | 0.955300000  | 0.580700000  | -2.078100000 |
| H  | -0.210500000 | -1.571400000 | -1.635400000 |
| H  | -0.968800000 | -0.371100000 | 0.953300000  |
| H  | -2.919600000 | -1.142200000 | 1.833300000  |
| H  | -3.738900000 | 0.978900000  | 2.234400000  |
| H  | -4.997200000 | 2.996500000  | 1.543300000  |
| H  | -6.090600000 | 3.078300000  | -0.687900000 |
| H  | -5.908100000 | 1.130600000  | -2.222400000 |
| H  | -4.640400000 | -0.883700000 | -1.529600000 |
| H  | -4.182200000 | -2.985200000 | -0.008400000 |
| H  | -5.099100000 | -2.346200000 | 1.199500000  |
| H  | 4.177500000  | 2.629000000  | -1.126400000 |
| H  | 2.667600000  | 3.574400000  | -1.270500000 |
| H  | 2.816100000  | 1.997500000  | -2.061900000 |

**Table S9** Atomic coordinates for the DFT optimized (B3LYP/6-31g(d,p)) **Amax**.

|   | <i>x</i>     | <i>y</i>     | <i>z</i>     |
|---|--------------|--------------|--------------|
| C | 2.990000000  | 2.826700000  | 1.408800000  |
| C | 2.656600000  | 1.997400000  | 0.168100000  |
| C | 3.269000000  | 0.569300000  | 0.268200000  |
| N | 2.371400000  | -0.302300000 | -0.520000000 |
| C | 1.096800000  | 0.267800000  | -1.002400000 |
| S | 0.778000000  | 1.680300000  | 0.115100000  |
| C | 0.429500000  | -1.125100000 | -0.743300000 |
| C | 1.820400000  | -1.497100000 | -0.165400000 |
| O | 2.288100000  | -2.461700000 | 0.437700000  |
| N | -0.684000000 | -1.192200000 | 0.152300000  |

|    |               |               |               |
|----|---------------|---------------|---------------|
| C  | -1.8077000000 | -1.9172000000 | -0.1406000000 |
| O  | -1.9127000000 | -2.6016000000 | -1.1516000000 |
| C  | -2.9623000000 | -1.7726000000 | 0.8646000000  |
| C  | -3.8118000000 | -0.5617000000 | 0.4744000000  |
| C  | -3.9849000000 | 0.5065000000  | 1.3579000000  |
| C  | -4.7769000000 | 1.6048000000  | 1.0189000000  |
| C  | -5.4095000000 | 1.6452000000  | -0.2261000000 |
| C  | -5.2445000000 | 0.5831000000  | -1.1252000000 |
| C  | -4.4549000000 | -0.5040000000 | -0.7732000000 |
| O  | -6.1994000000 | 2.6858000000  | -0.6234000000 |
| N  | -3.6631000000 | -3.0547000000 | 0.9065000000  |
| C  | 4.8008000000  | 0.4054000000  | -0.0540000000 |
| O  | 5.5241000000  | 1.3925000000  | 0.0960000000  |
| C  | 3.0779000000  | 2.7366000000  | -1.1099000000 |
| O  | 5.1354000000  | -0.7906000000 | -0.3443000000 |
| Na | 4.4975000000  | -2.6791000000 | 0.2464000000  |
| H  | 2.6304000000  | 2.3460000000  | 2.3239000000  |
| H  | 2.5480000000  | 3.8254000000  | 1.3443000000  |
| H  | 4.0777000000  | 2.9232000000  | 1.4616000000  |
| H  | 3.1721000000  | 0.2421000000  | 1.3140000000  |
| H  | 1.1176000000  | 0.5864000000  | -2.0467000000 |
| H  | 0.1570000000  | -1.6735000000 | -1.6482000000 |
| H  | -0.6624000000 | -0.6176000000 | 0.9839000000  |
| H  | -2.5341000000 | -1.5692000000 | 1.8565000000  |
| H  | -3.5020000000 | 0.4839000000  | 2.3322000000  |
| H  | -4.9035000000 | 2.4249000000  | 1.7225000000  |
| H  | -5.7385000000 | 0.6327000000  | -2.0898000000 |
| H  | -4.3202000000 | -1.3189000000 | -1.4785000000 |
| H  | -6.2213000000 | 3.3530000000  | 0.0751000000  |
| H  | -3.6679000000 | -3.4435000000 | -0.0345000000 |
| H  | -4.6277000000 | -2.9105000000 | 1.1904000000  |
| H  | 4.1584000000  | 2.8920000000  | -1.0786000000 |
| H  | 2.5676000000  | 3.7009000000  | -1.1754000000 |
| H  | 2.8447000000  | 2.1665000000  | -2.0143000000 |

## S5. Photophysical and AIE studies

### S5.1 Quantum yield measurement

For **B3E** in dissolved state (100% THF),  $\Phi F = 0.0118$

For **B3E** in aggregated state (H<sub>2</sub>O:THF = 95:5 v:v),  $\Phi F = 0.0586$

For **F-B3E** in dissolved state (100% THF),  $\Phi F = 0.0208$

For **F-B3E** in aggregated state (H<sub>2</sub>O:THF = 95:5 v:v),  $\Phi F = 0.1089$

### S5.2 UV-vis and fluorescence measurements

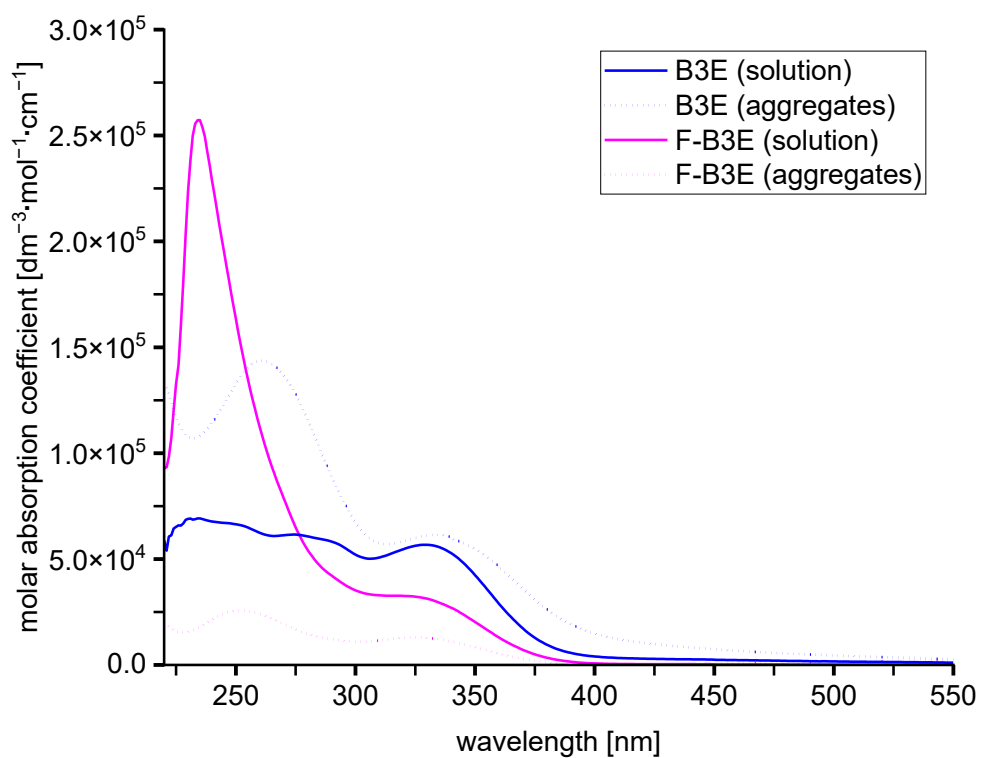

**Figure S19** UV-vis stacked spectra of **B3E** and **F-B3E** ( $C = 2 \cdot 10^{-6}$ ) in solution (100% THF) and in aggregated state (95:5 H<sub>2</sub>O:THF v/v). ( $C = 2 \cdot 10^{-6}$ ).

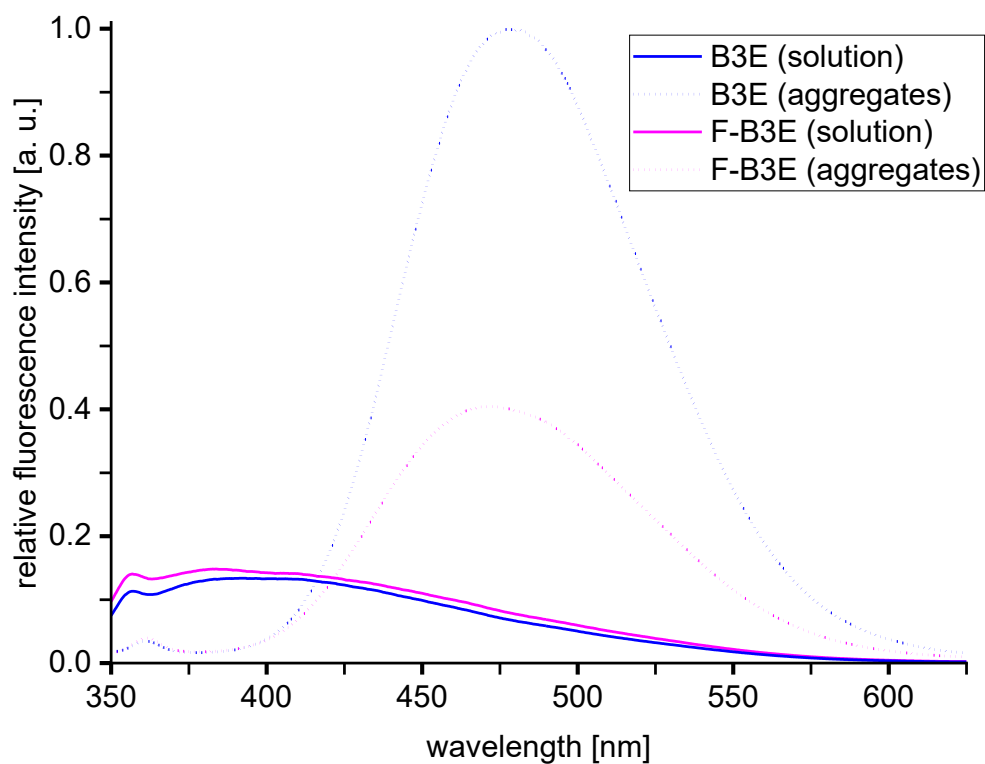

**Figure S20** Stacked fluorescence spectra of **B3E** and **F-B3E** ( $C = 2 \cdot 10^{-6}$ ) in solution (100% THF) and in aggregated state (95:5  $H_2O$ :THF v/v). ( $C = 2 \cdot 10^{-6}$ ).

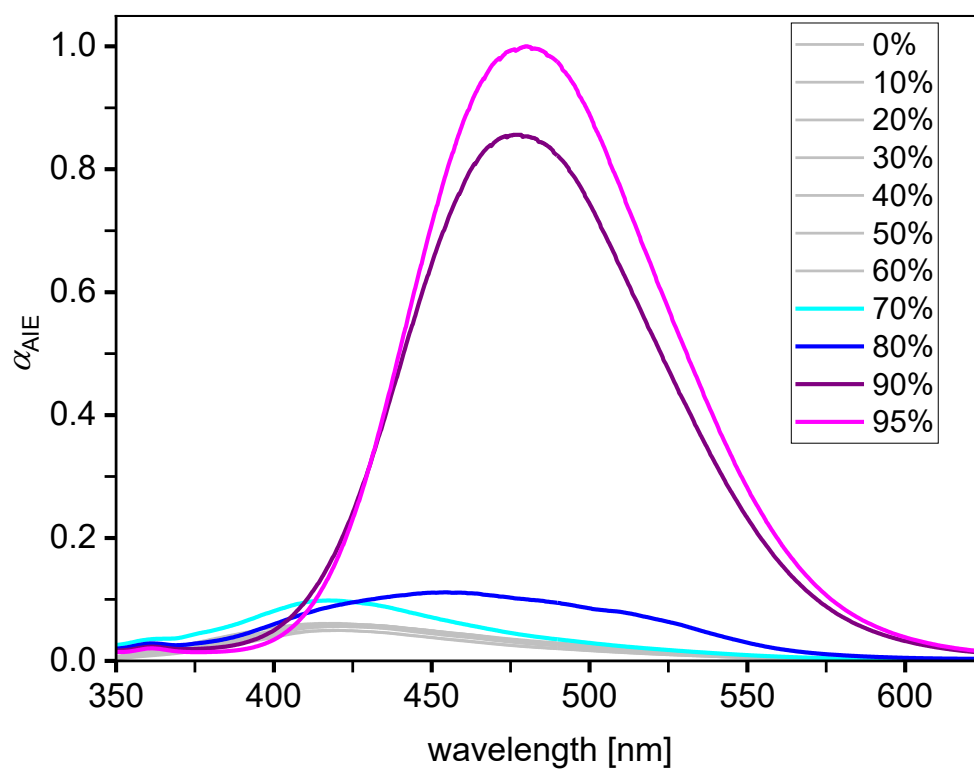

**Figure S21** Relative fluorescence intensity of **B3E** in water:THF systems with increasing water content ( $C = 2 \cdot 10^{-5}$  M,  $\lambda_{ex} = 320$  nm).

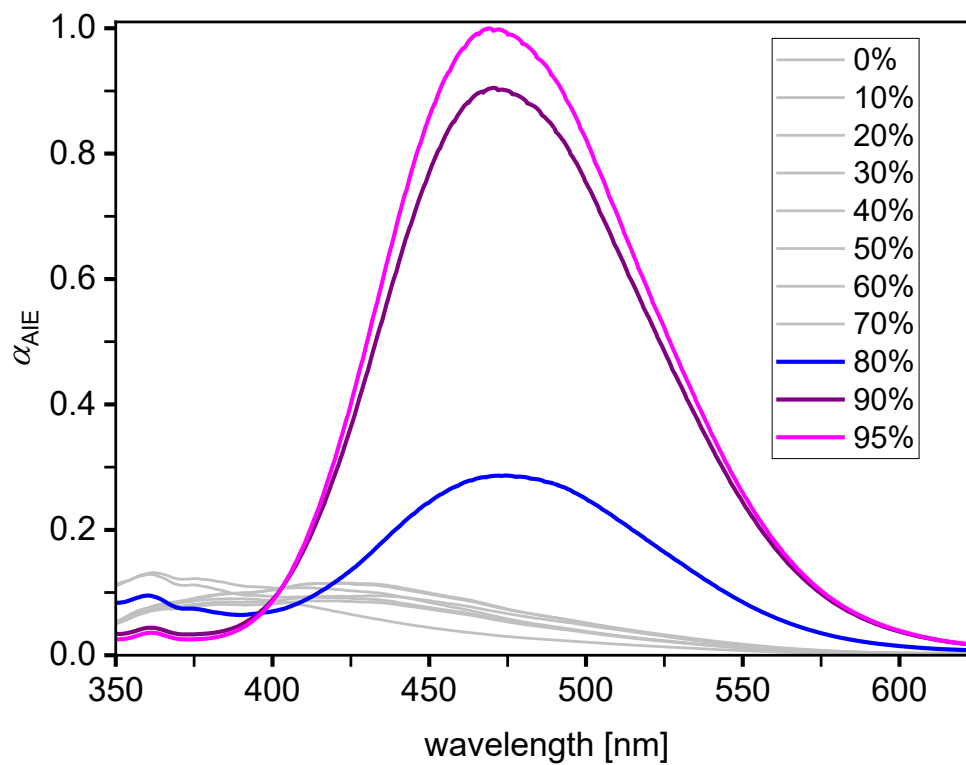

**Figure S22** Relative fluorescence intensity of **B3E a** in water:THF systems with increasing water content ( $C = 2 \cdot 10^{-5}$  M,  $\lambda_{\text{ex}} = 320$  nm).

### S5.3 Dynamic Light Scattering measurements

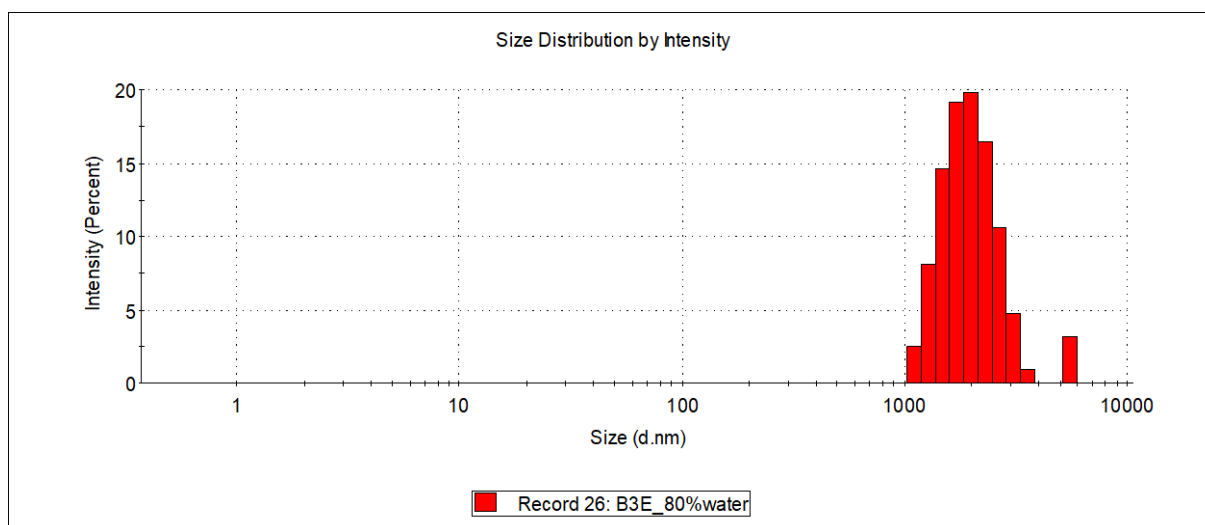

**Figure S23** DLS experiment results: size distribution by intensity for **B3E** in H<sub>2</sub>O:THF 80:20 v/v. Average aggregate size in dominant peak: d = 1974 nm.

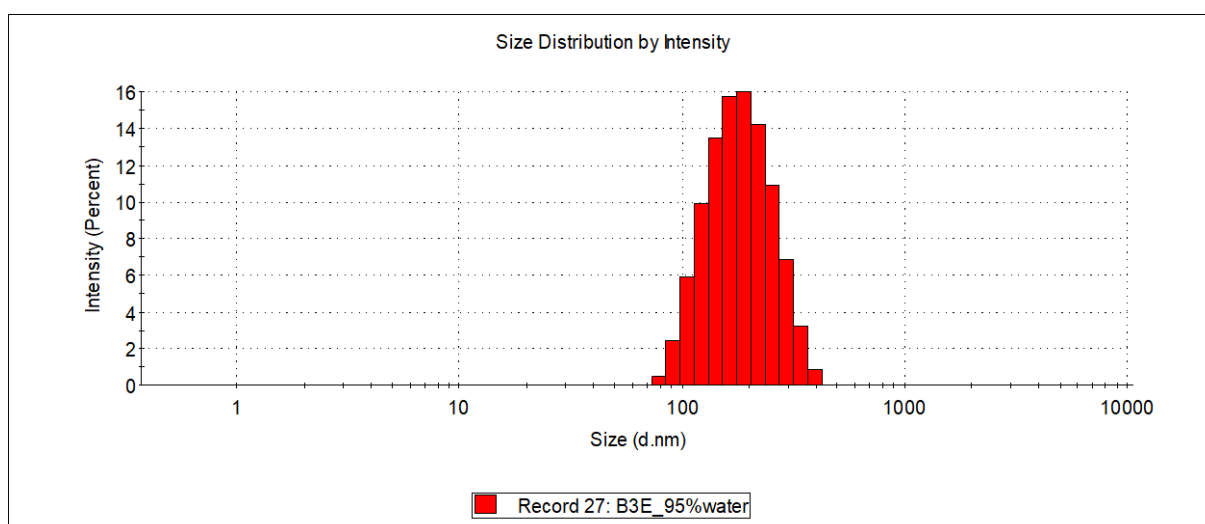

**Figure S24** DLS experiment results: size distribution by intensity for **B3E** in H<sub>2</sub>O:THF 95:5 v/v. Average aggregate size in dominant peak: d = 190.1 nm.

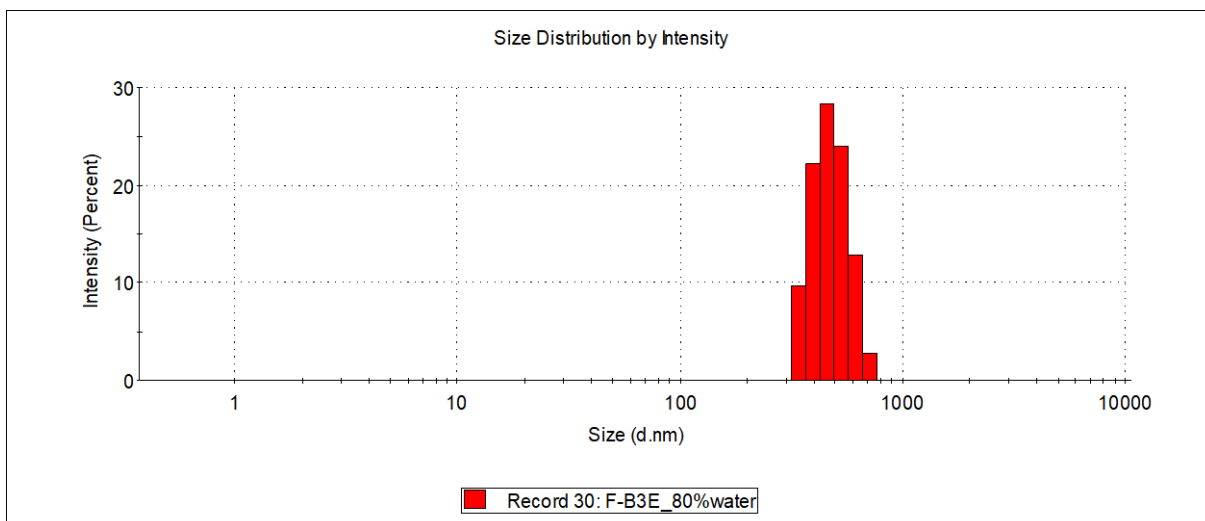

**Figure S25** DLS experiment results: size distribution by intensity for **F-B3E** in H<sub>2</sub>O:THF 80:20 v/v. Average aggregate size in dominant peak: d = 478.1 nm.

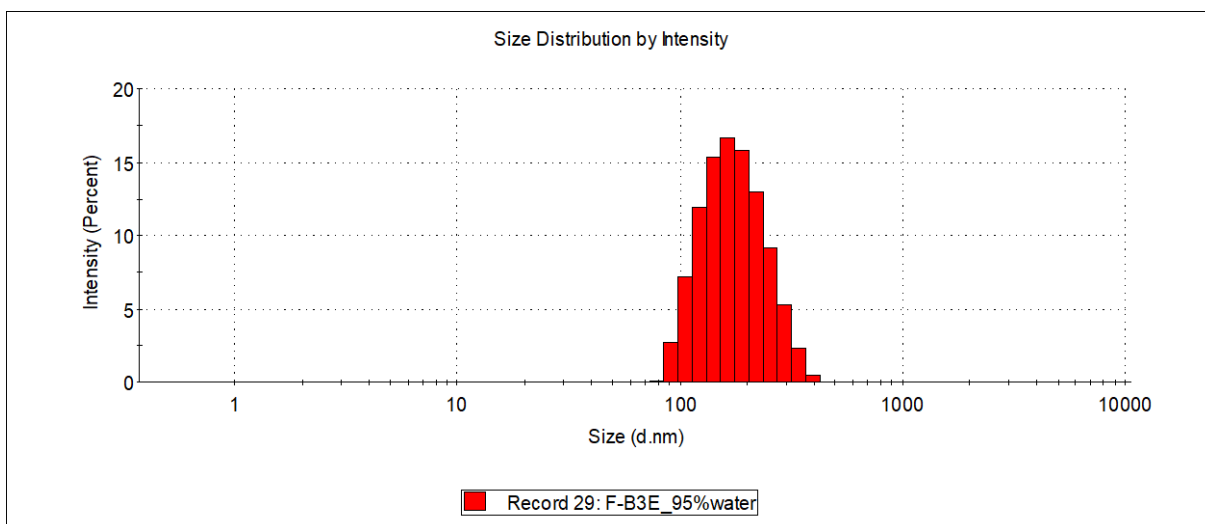

**Figure S26** DLS experiment results: size distribution by intensity for **F-B3E** in H<sub>2</sub>O:THF 95:5 v/v. Average aggregate size in dominant peak: d = 181.4 nm.

## S6. Receptor studies

### S6.1 Spectrofluorimetry

For the calculation of Stern-Volmer constant values equation:

$$\frac{I_0}{I} - 1 = K_{S-V} \cdot C_{analyte}$$

where:

$I_0$  – fluorescence intensity at starting point [a. u.]

$I$  – fluorescence intensity at measured point [a. u.]

$K_{S-V}$  – Stern-Volmer constant value [ $M^{-1}$ ]

$C_{analyte}$  – concentration of analyte at measured point [M]

was used.  $K_{S-V}$  were calculated as the slope of linear regression from experimental points. LOD values were calculated as  $\frac{3 \cdot \sigma}{K_{S-V}}$ .

**Table S10.** Comparison of  $K_{S-V}$ ,  $K_d$  and LOD values for **B3E** and **F-B3E** in different solvent systems (water:THF).

| Water content        | Solvent – receptor system |               | $K_{S-V} \cdot 10^3 [M^{-1}]$ | LOD [ $\mu M$ ] |
|----------------------|---------------------------|---------------|-------------------------------|-----------------|
| 95% vol.             | Ultrapure water 95%       | <b>B3E</b>    | 3.049 ± 0.111                 | 5.7             |
|                      |                           | <b>F-B3E</b>  | 2.972 ± 0.124                 | 6.5             |
| 99% vol.             | Ultrapure water           | <b>B3E</b>    | 3.459 ± 0.025                 | 1.1             |
|                      |                           | <b>F-B3E</b>  | 3.103 ± 0.216                 | 10.8            |
|                      | Buffer, pH 5.14           | <b>B3E</b>    | 3.203 ± 0.155                 | 7.5             |
|                      |                           | <b>F-B3E</b>  | 2.452 ± 0.148                 | 9.4             |
|                      | Buffer, pH 7.4            | <b>B3E</b>    | 4.581 ± 0.068                 | 2.3             |
|                      |                           | <b>F-B3E</b>  | 4.337 ± 0.176                 | 6.3             |
|                      | Buffer, pH 8.29           | <b>B3E</b>    | 4.107 ± 0.079                 | 3.0             |
|                      |                           | <b>F-B3E</b>  | 2.700 ± 0.154                 | 8.9             |
|                      | Tap water                 | <b>B3E</b>    | 3.369 ± 0.153                 | 7.1             |
|                      |                           | <b>F-B3E</b>  | 3.159 ± 0.133                 | 6.5             |
|                      | Seawater (filtered)       | <b>B3E</b>    | 4.070 ± 0.077                 | 2.9             |
|                      |                           | <b>F-B3E</b>  | 5.411 ± 0.228                 | 6.5             |
|                      | Seawater (non-filtered)   | <b>B3E</b>    | 4.101 ± 0.178                 | 6.7             |
|                      |                           | <b>F-B3E</b>  | 4.346 ± 0.152                 | 5.4             |
| Artesian groundwater | <b>B3E</b>                | 4.115 ± 0.179 | 6.4                           |                 |
|                      | <b>F-B3E</b>              | 2.423 ± 0.198 | 12.7                          |                 |

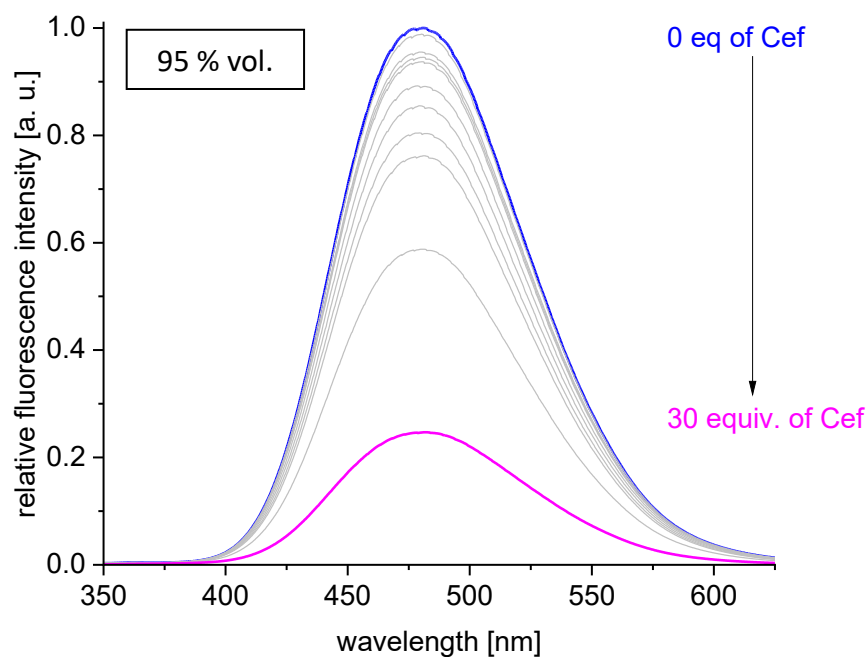

**Figure S27** Emission spectra of aggregated **B3E** in the presence of increasing molar equivalents of Ceftazidime (Cef). Conditions: H<sub>2</sub>O:THF = 95:5 v/v, C = 2·10<sup>-5</sup> mol·dm<sup>-3</sup>, λ<sub>ex</sub> = 320 nm. For convenience, the value in the frame shows the water content.

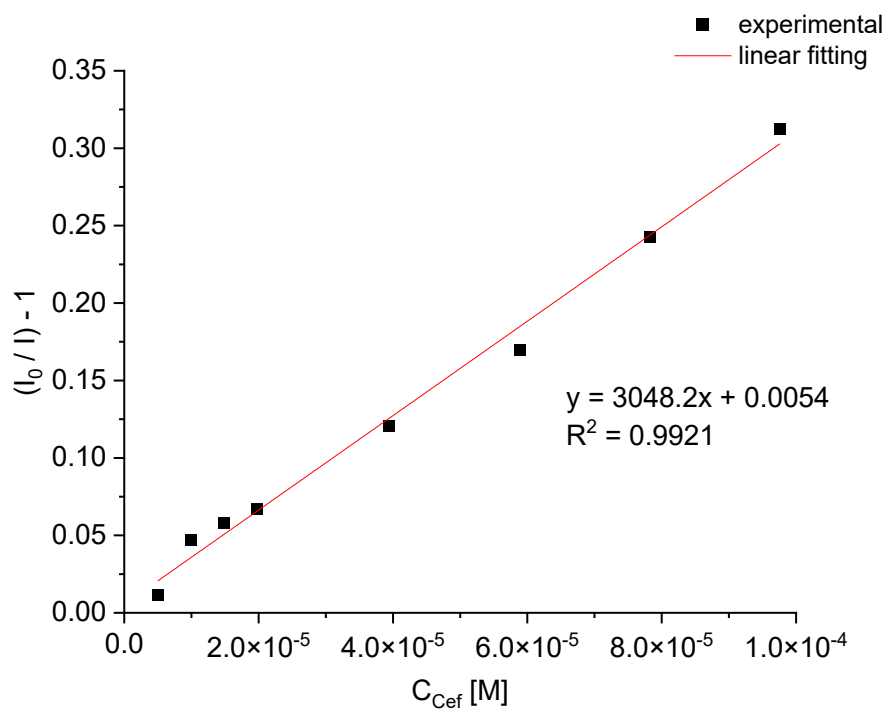

**Figure S28** Experimental points and linear fitting of Stern-Volmer correlation for spectrofluorimetric titration of **B3E** with Ceftazidime (Cef). Conditions: H<sub>2</sub>O:THF = 95:5 v/v, C = 2·10<sup>-5</sup> mol·dm<sup>-3</sup>, λ<sub>ex</sub> = 320 nm.

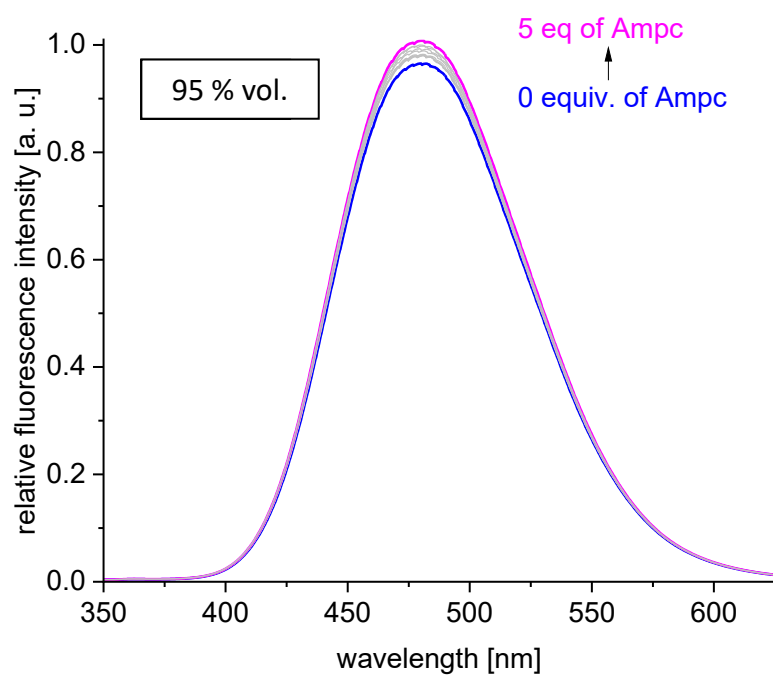

**Figure S29** Emission spectra of aggregated **B3E** in the presence of increasing molar equivalents of Ampicillin (Ampc). Conditions: H<sub>2</sub>O:THF = 95:5 v/v,  $C = 2 \cdot 10^{-5} \text{ mol} \cdot \text{dm}^{-3}$ ,  $\lambda_{\text{ex}} = 320 \text{ nm}$ . For convenience, the value in the frame shows the water content.

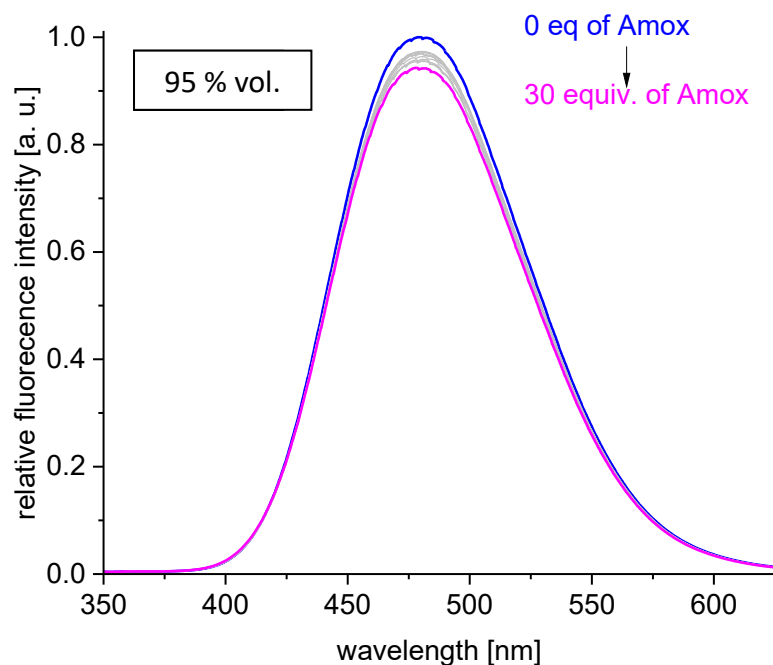

**Figure S30** Emission spectra of aggregated **B3E** in the presence of increasing molar equivalents of Amoxicillin (Amox). Conditions: H<sub>2</sub>O:THF = 95:5 v/v,  $C = 2 \cdot 10^{-5} \text{ mol} \cdot \text{dm}^{-3}$ ,  $\lambda_{\text{ex}} = 320 \text{ nm}$ . For convenience, the value in the frame shows the water content.

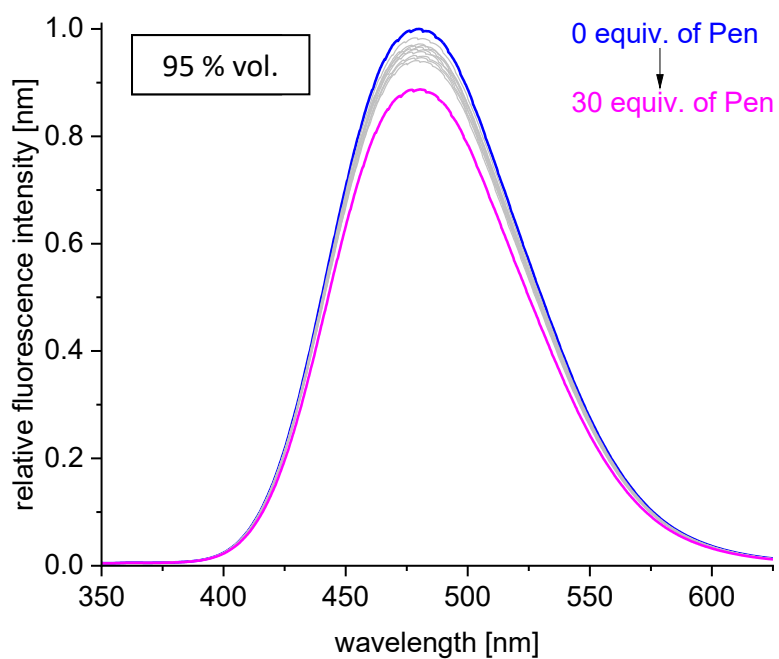

**Figure S31** Emission spectra of aggregated **B3E** in the presence of increasing molar equivalents of Penicillin (Pen). Conditions: H<sub>2</sub>O:THF = 95:5 v/v, C = 2·10<sup>-5</sup> mol·dm<sup>-3</sup>, λ<sub>ex</sub> = 320 nm. For convenience, the value in the frame shows the water content.

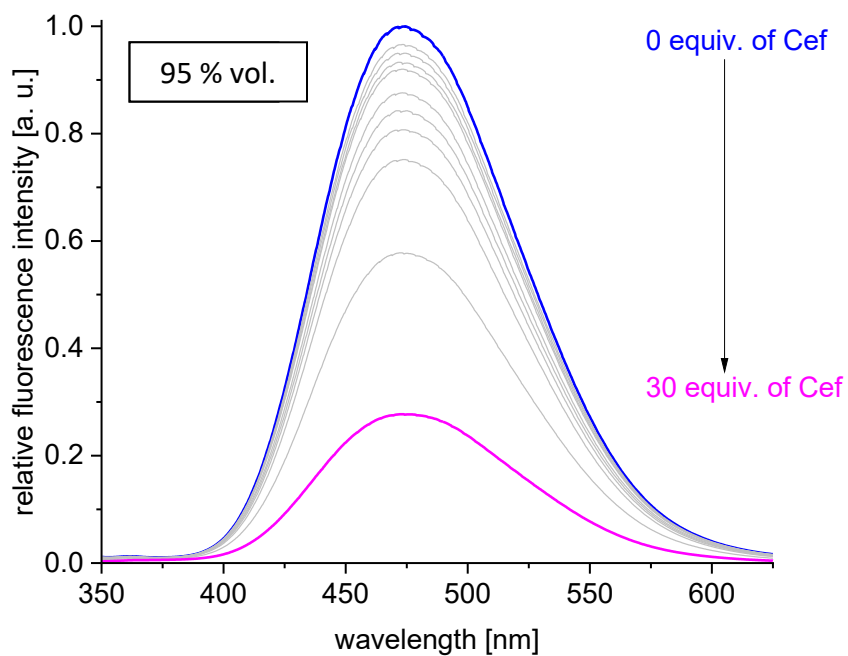

**Figure S32** Emission spectra of aggregated **F-B3E** in the presence of increasing molar equivalents of Ceftazidime (Cef). Conditions: H<sub>2</sub>O:THF = 95:5 v/v, C = 2·10<sup>-5</sup> mol·dm<sup>-3</sup>, λ<sub>ex</sub> = 320 nm. For convenience, the value in the frame shows the water content.

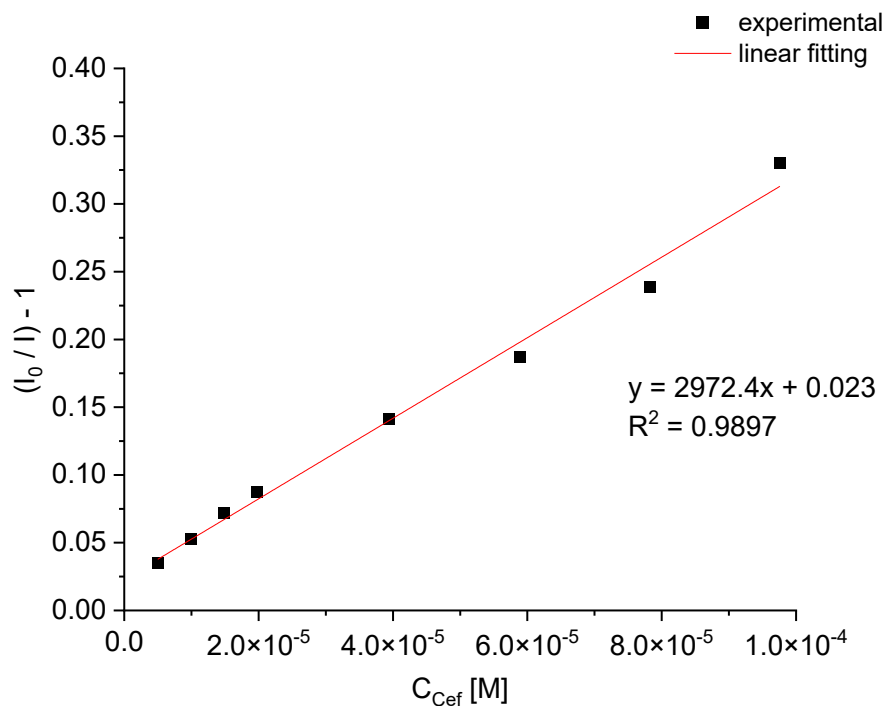

**Figure S33** Experimental points and linear fitting of Stern-Volmer correlation for spectrofluorimetric titration of **F-B3E** with Ceftazidime (Cef). Conditions:  $\text{H}_2\text{O}:\text{THF} = 95:5 \text{ v/v}$ ,  $C = 2 \cdot 10^{-5} \text{ mol} \cdot \text{dm}^{-3}$ ,  $\lambda_{\text{ex}} = 320 \text{ nm}$ . For convenience, the value in the frame shows the water content.

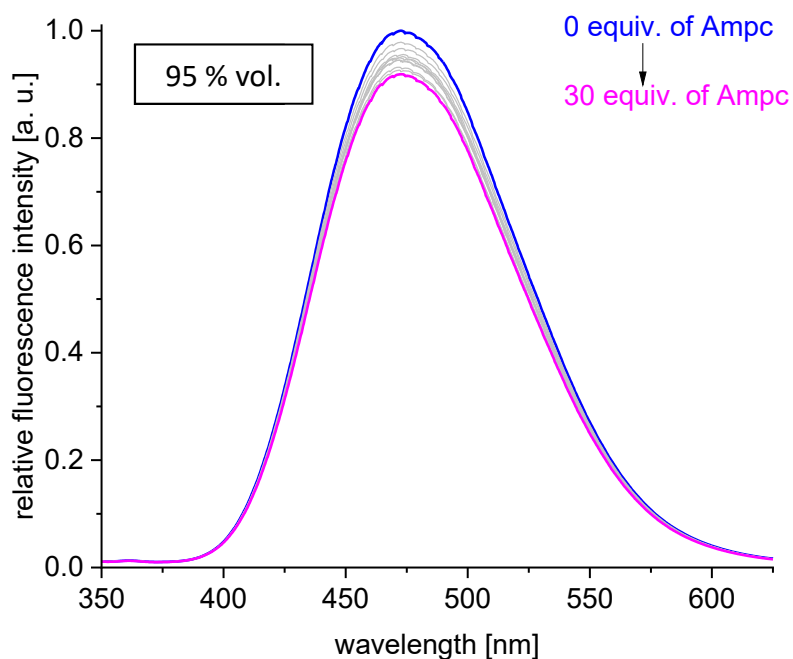

**Figure S34** Emission spectra of aggregated **F-B3E** in the presence of increasing molar equivalents of Ampicillin (Ampc). Conditions:  $\text{H}_2\text{O}:\text{THF} = 95:5 \text{ v/v}$ ,  $C = 2 \cdot 10^{-5} \text{ mol} \cdot \text{dm}^{-3}$ ,  $\lambda_{\text{ex}} = 320 \text{ nm}$ . For convenience, the value in the frame shows the water content.

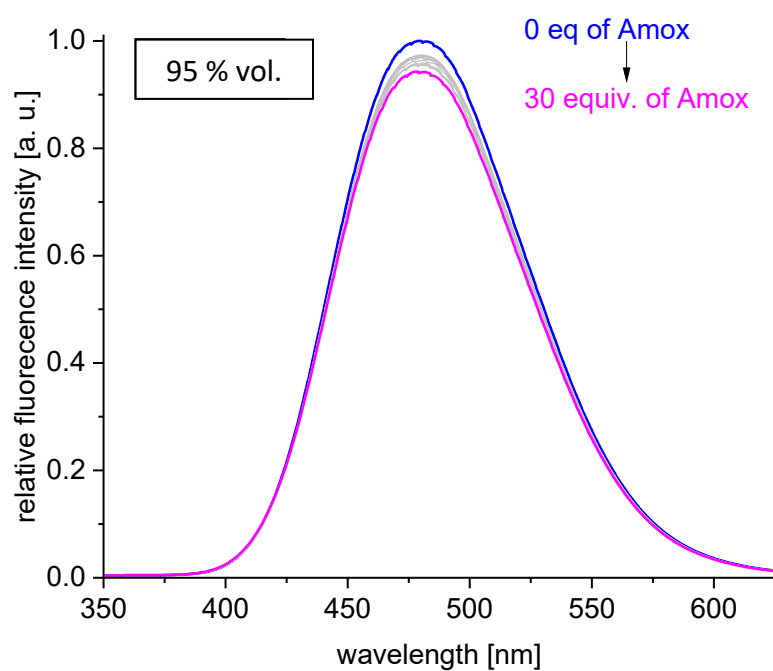

**Figure S35** Emission spectra of aggregated **F-B3E** in the presence of increasing molar equivalents of Amoxicillin (Amox). Conditions: H<sub>2</sub>O:THF = 95:5 v/v, C = 2·10<sup>-5</sup> mol·dm<sup>-3</sup>, λ<sub>ex</sub> = 320 nm. For convenience, the value in the frame shows the water content.

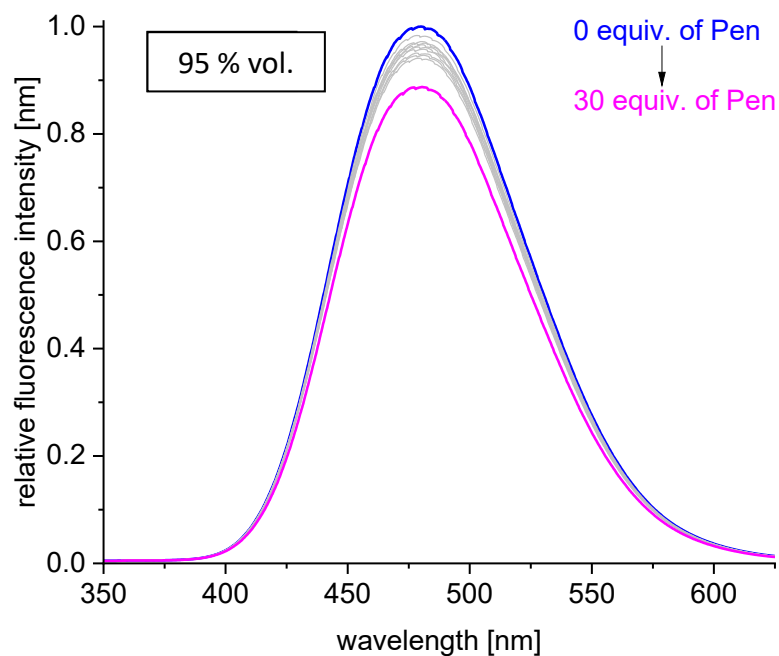

**Figure S36** Emission spectra of aggregated **F-B3E** in the presence of increasing molar equivalents of Penicillin (Pen). Conditions: H<sub>2</sub>O:THF = 95:5 v/v, C = 2·10<sup>-5</sup> mol·dm<sup>-3</sup>, λ<sub>ex</sub> = 320 nm. For convenience, the value in the frame shows the water content.

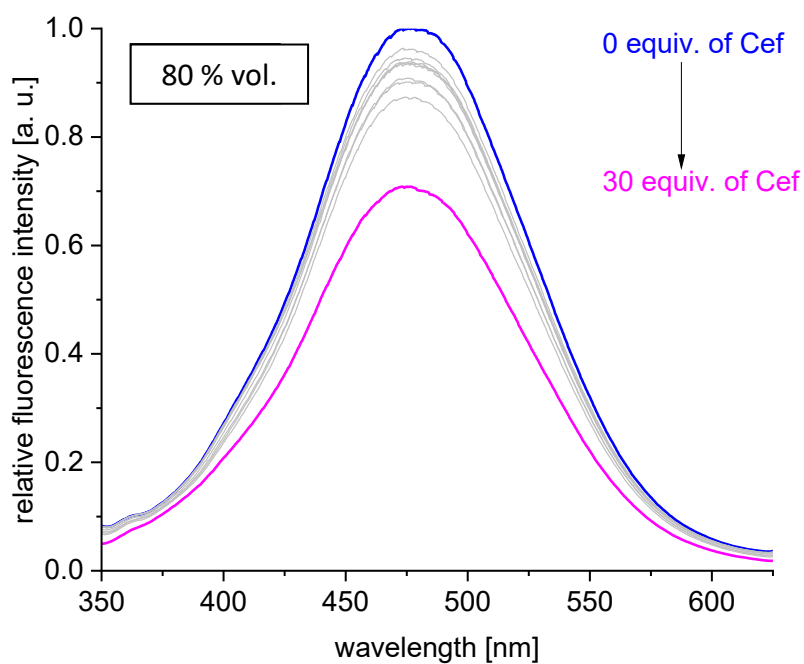

**Figure S37** Emission spectra of aggregated **B3E** in the presence of increasing molar equivalents of Ceftazidime (Cef). Conditions: H<sub>2</sub>O:THF = 80:20 v/v, C = 2·10<sup>-5</sup> mol·dm<sup>-3</sup>, λ<sub>ex</sub> = 320 nm. For convenience, the value in the frame shows the water content.

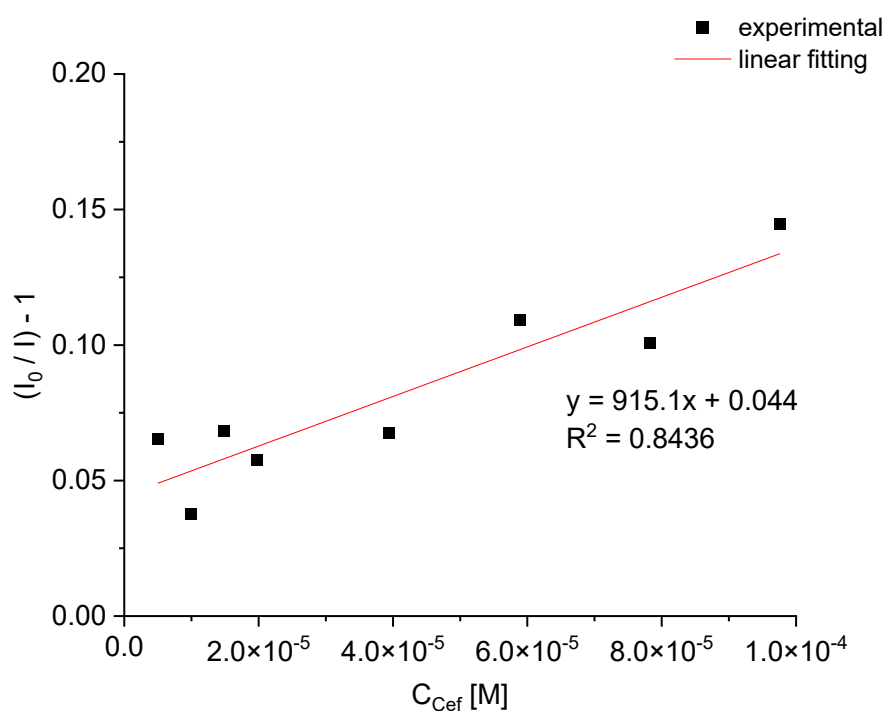

**Figure S38** Experimental points and linear fitting of Stern-Volmer correlation for spectrofluorimetric titration of **B3E** with Ceftazidime (Cef). Conditions: H<sub>2</sub>O:THF = 80:20 v/v, C = 2·10<sup>-5</sup> mol·dm<sup>-3</sup>, λ<sub>ex</sub> = 320 nm.

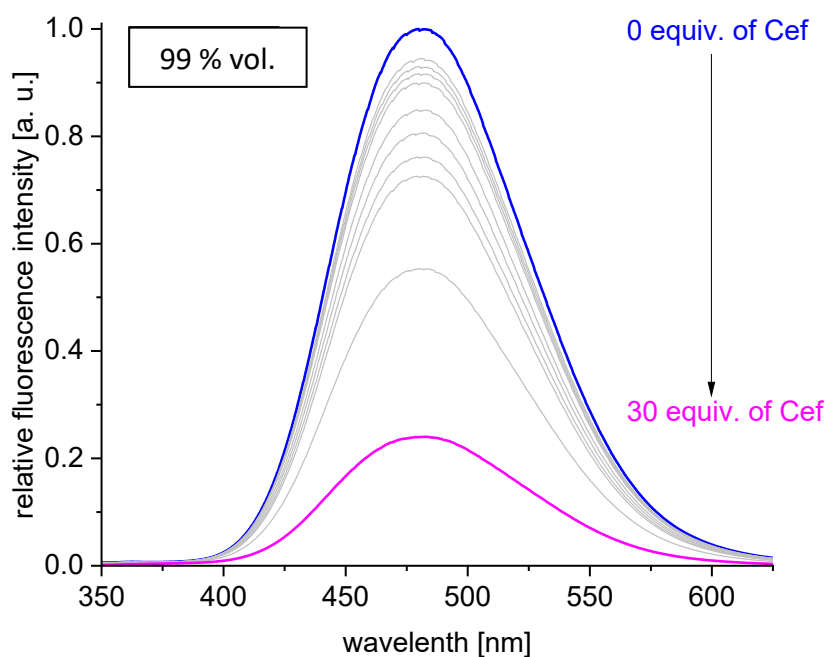

**Figure S39** Emission spectra of aggregated **B3E** in the presence of increasing molar equivalents of Ceftazidime (Cef). Conditions: H<sub>2</sub>O:THF = 99:1 v/v, C = 2·10<sup>-5</sup> mol·dm<sup>-3</sup>, λ<sub>ex</sub> = 320 nm. For convenience, the value in the frame shows the water content.

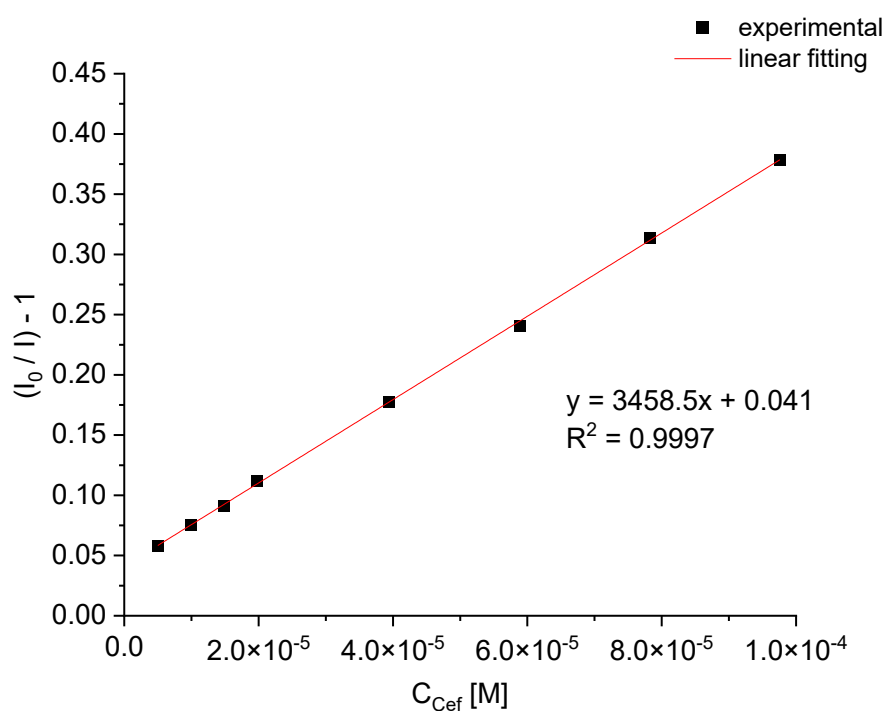

**Figure S40** Experimental points and linear fitting of Stern-Volmer correlation for spectrofluorimetric titration of **B3E** with Ceftazidime (Cef). Conditions: H<sub>2</sub>O:THF = 99:1 v/v, C = 2·10<sup>-5</sup> mol·dm<sup>-3</sup>, λ<sub>ex</sub> = 320 nm.

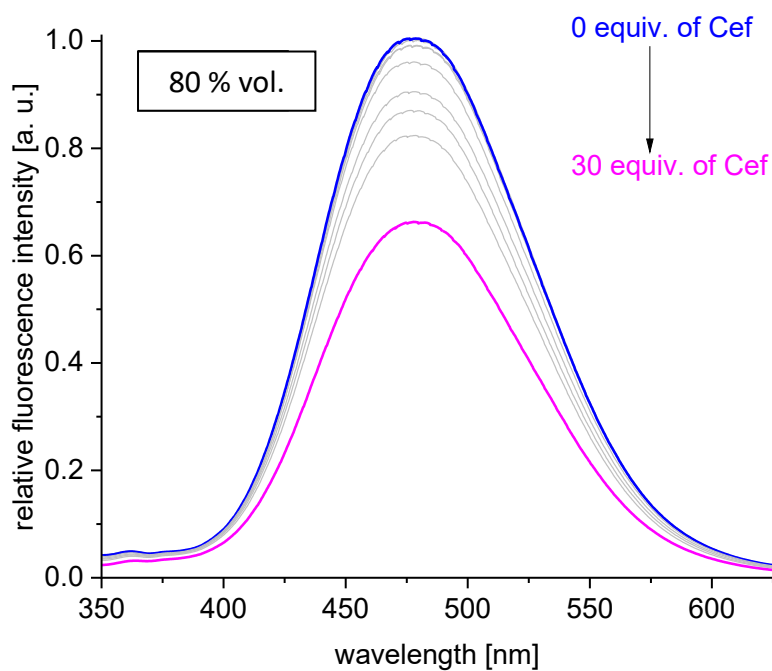

**Figure S41** Emission spectra of aggregated **F-B3E** in the presence of increasing molar equivalents of Ceftazidime (Cef). Conditions: H<sub>2</sub>O:THF = 80:20 v/v, C = 2·10<sup>-5</sup> mol·dm<sup>-3</sup>, λ<sub>ex</sub> = 320 nm. For convenience, the value in the frame shows the water content.

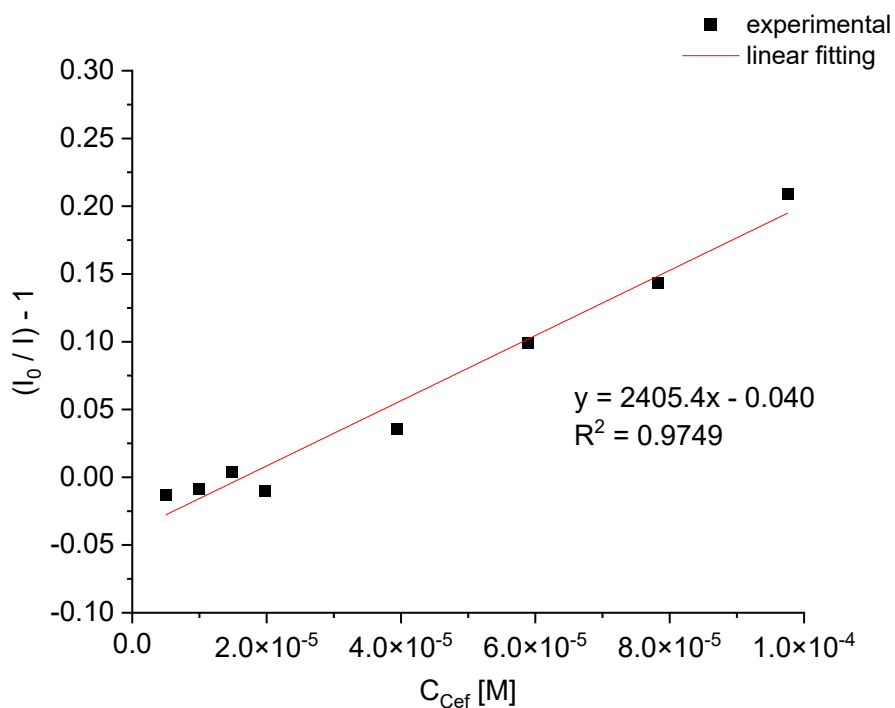

**Figure S42** Experimental points and linear fitting of Stern-Volmer correlation for spectrofluorimetric titration of **F-B3E** with Ceftazidime (Cef). Conditions: H<sub>2</sub>O:THF = 80:20 v/v, C = 2·10<sup>-5</sup> mol·dm<sup>-3</sup>, λ<sub>ex</sub> = 320 nm.

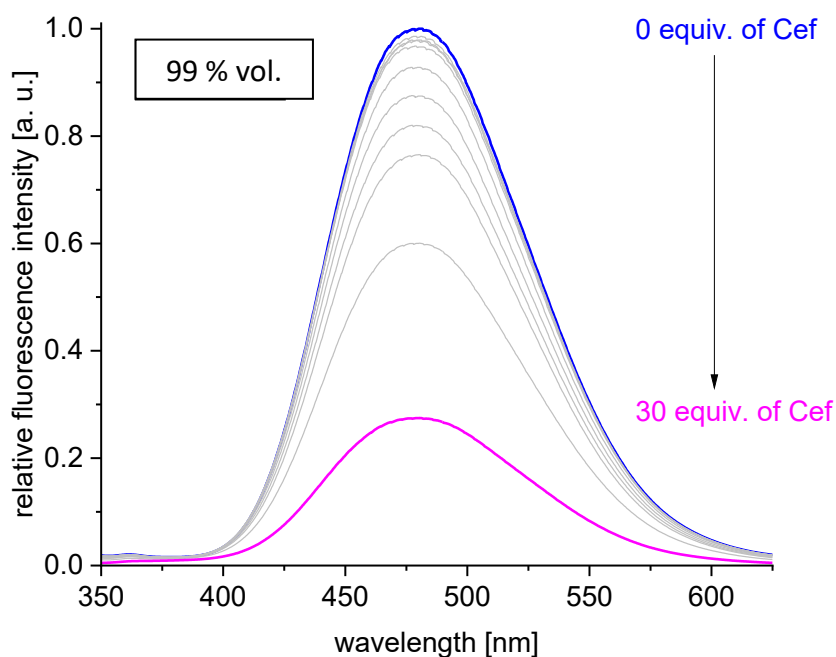

**Figure S43** Emission spectra of aggregated **F-B3E** in the presence of increasing molar equivalents of Ceftazidime (Cef). Conditions: H<sub>2</sub>O:THF = 99:1 v/v,  $C = 2 \cdot 10^{-5} \text{ mol} \cdot \text{dm}^{-3}$ ,  $\lambda_{\text{ex}} = 320 \text{ nm}$ . For convenience, the value in the frame shows the water content.

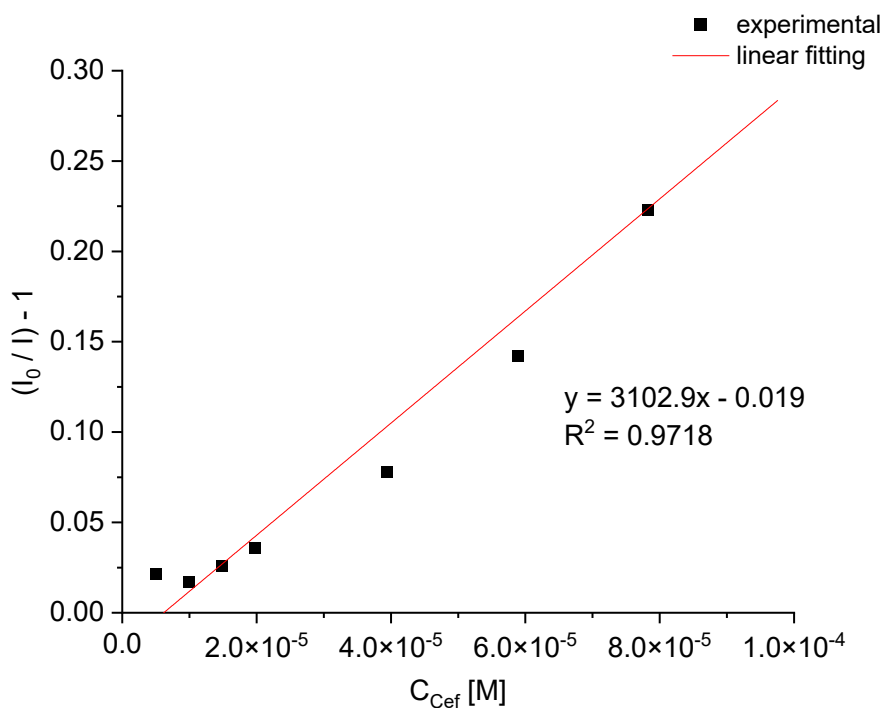

**Figure S44** Experimental points and linear fitting of Stern-Volmer correlation for spectrofluorimetric titration of **F-B3E** with Ceftazidime (Cef). Conditions: H<sub>2</sub>O:THF = 99:1 v/v,  $C = 2 \cdot 10^{-5} \text{ mol} \cdot \text{dm}^{-3}$ ,  $\lambda_{\text{ex}} = 320 \text{ nm}$ .

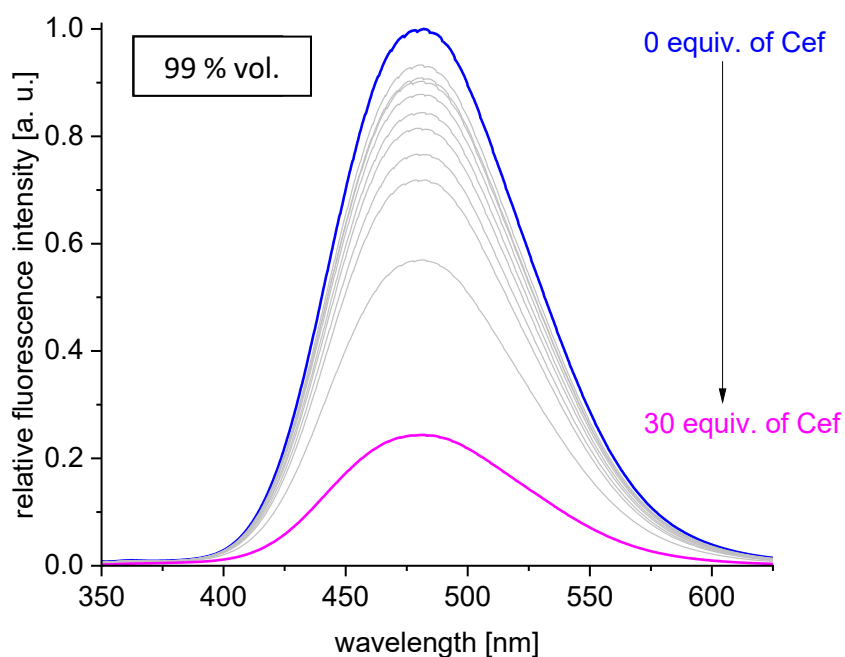

**Figure S45** Emission spectra of aggregated **B3E** in the presence of increasing molar equivalents of Ceftazidime (Cef). Conditions: buffer (MES, pH = 5.14,  $C = 0.01\text{M}$ ):THF = 99:1 v/v,  $C = 2 \cdot 10^{-5} \text{ mol} \cdot \text{dm}^{-3}$ ,  $\lambda_{\text{ex}} = 320 \text{ nm}$ . For convenience, the value in the frame shows the water content.

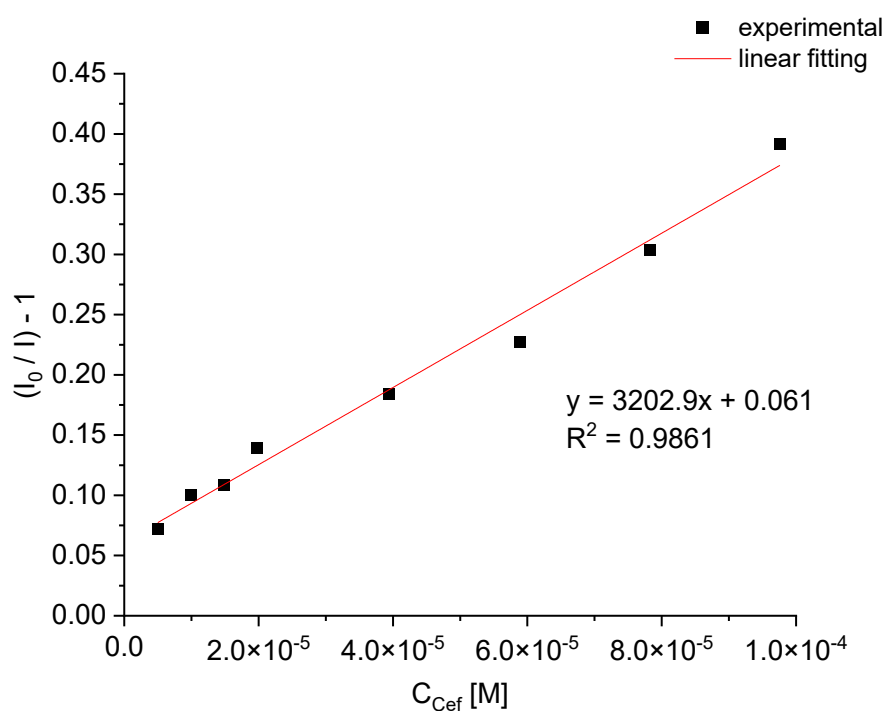

**Figure S46** Experimental points and linear fitting of Stern-Volmer correlation for spectrofluorimetric titration of **B3E** with Ceftazidime (Cef). Conditions: buffer (MES, pH = 5.14,  $C = 0.01\text{M}$ ):THF = 99:1,  $C = 2 \cdot 10^{-5} \text{ mol} \cdot \text{dm}^{-3}$ ,  $\lambda_{\text{ex}} = 320 \text{ nm}$ .

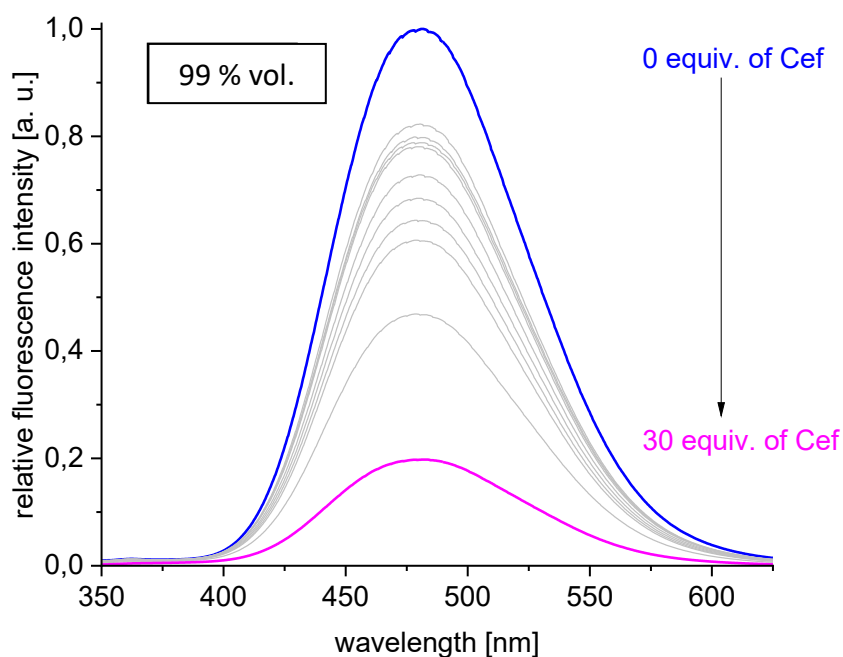

**Figure S47** Emission spectra of aggregated **B3E** in the presence of increasing molar equivalents of Ceftazidime (Cef). Conditions: buffer (PBS, pH = 7.40,  $C = 0.01\text{M}$ ):THF = 99:1 v/v,  $C = 2 \cdot 10^{-5} \text{ mol} \cdot \text{dm}^{-3}$ ,  $\lambda_{\text{ex}} = 320 \text{ nm}$ . For convenience, the value in the frame shows the water content.

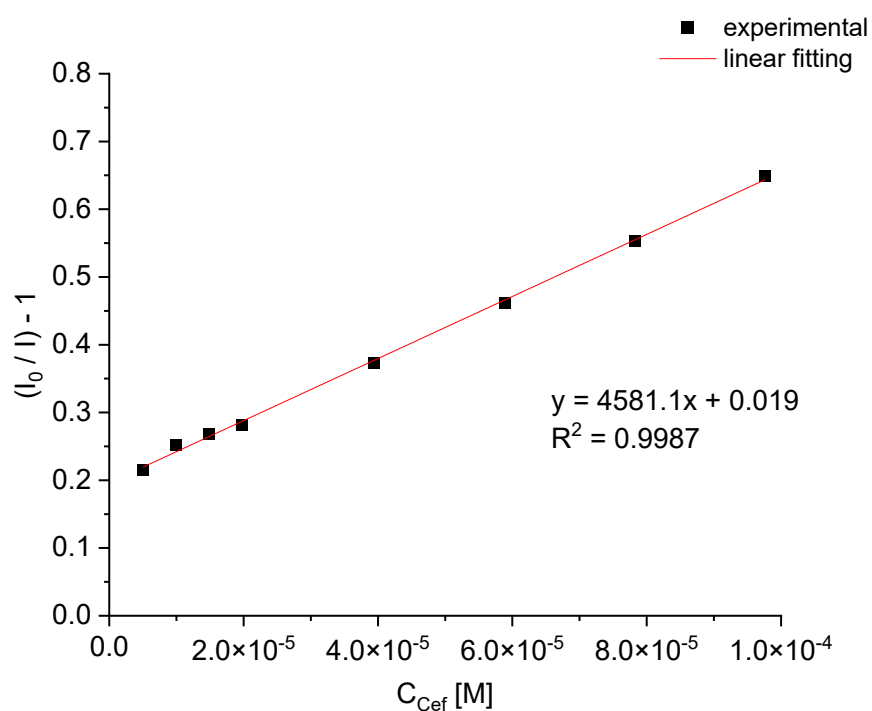

**Figure S48** Experimental points and linear fitting of Stern-Volmer correlation for spectrofluorimetric titration of **B3E** with Ceftazidime (Cef). Conditions: buffer (PBS, pH = 7.40,  $C = 0.01\text{M}$ ):THF = 99:1,  $C = 2 \cdot 10^{-5} \text{ mol} \cdot \text{dm}^{-3}$ ,  $\lambda_{\text{ex}} = 320 \text{ nm}$ .

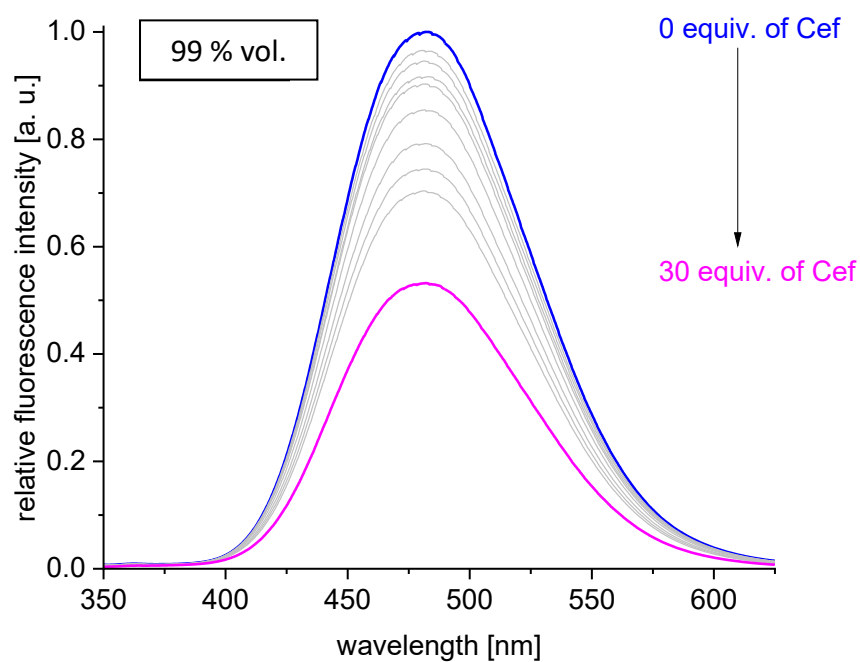

**Figure S49** Emission spectra of aggregated **B3E** in the presence of increasing molar equivalents of Ceftazidime (Cef). Conditions: buffer (Tris, pH = 8.29,  $C = 0.01\text{M}$ ):THF = 99:1 v/v,  $C = 2 \cdot 10^{-5} \text{ mol} \cdot \text{dm}^{-3}$ ,  $\lambda_{\text{ex}} = 320 \text{ nm}$ . For convenience, the value in the frame shows the water content.

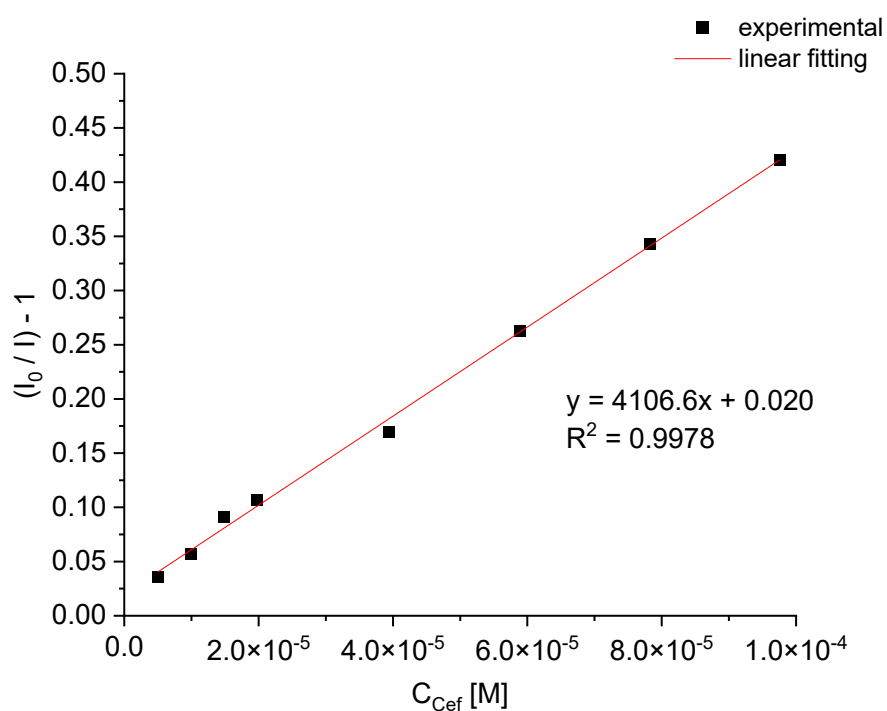

**Figure S50** Experimental points and linear fitting of Stern-Volmer correlation for spectrofluorimetric titration of **B3E** with Ceftazidime (Cef). Conditions: buffer (Tris, pH = 7.40,  $C = 0.01\text{M}$ ):THF = 99:1,  $C = 2 \cdot 10^{-5} \text{ mol} \cdot \text{dm}^{-3}$ ,  $\lambda_{\text{ex}} = 320 \text{ nm}$ .

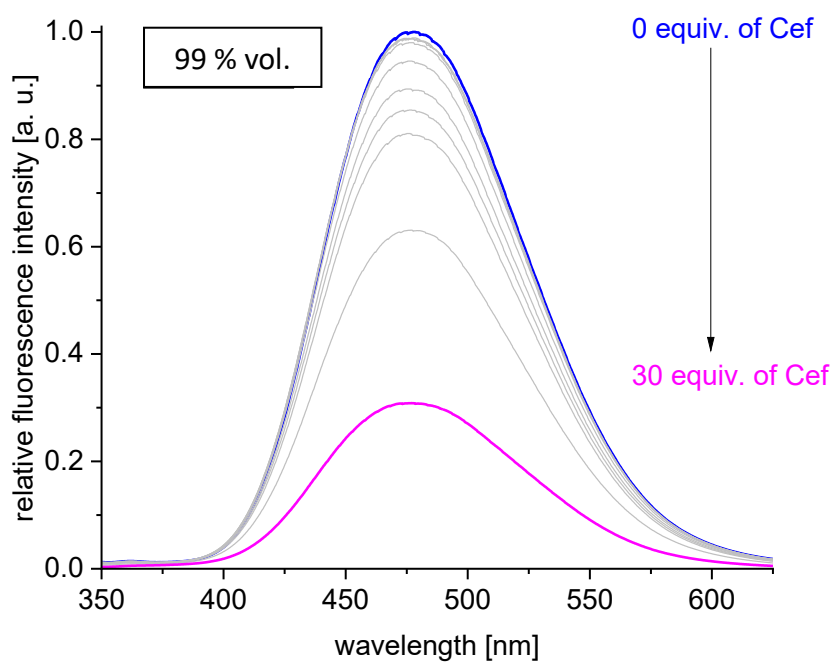

**Figure S51** Emission spectra of aggregated **F-B3E** in the presence of increasing molar equivalents of Ceftazidime (Cef). Conditions: buffer (MES, pH = 5.14, C = 0.01M):THF = 99:1 v/v, C =  $2 \cdot 10^{-5}$  mol·dm<sup>-3</sup>,  $\lambda_{\text{ex}}$  = 320 nm. For convenience, the value in the frame shows the water content.

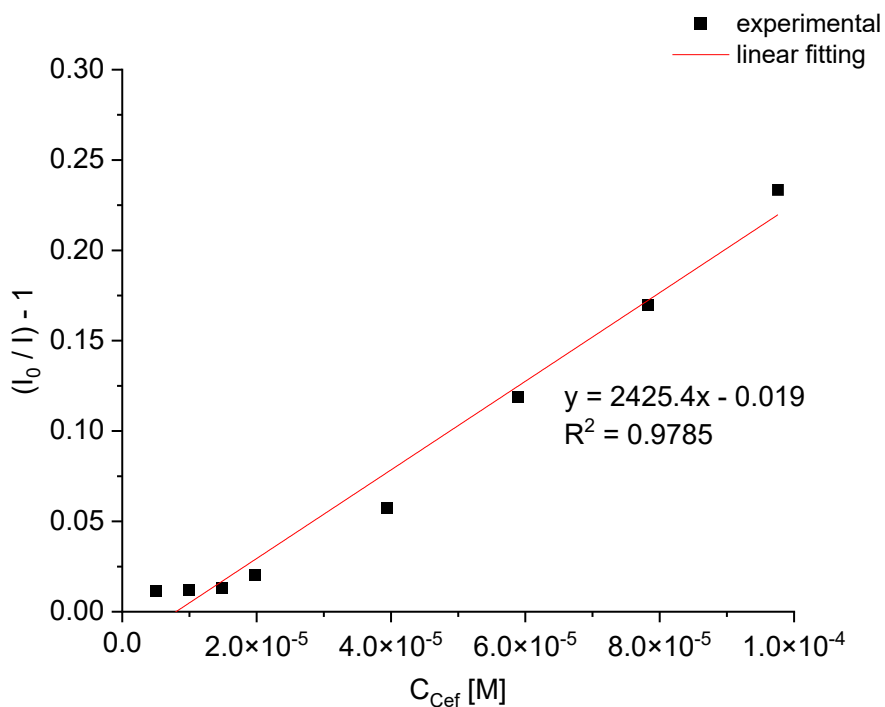

**Figure S52** Experimental points and linear fitting of Stern-Volmer correlation for spectrofluorimetric titration of **F-B3E** with Ceftazidime (Cef). Conditions: buffer (MES, pH = 5.14, C = 0.01M):THF = 99:1, C =  $2 \cdot 10^{-5}$  mol·dm<sup>-3</sup>,  $\lambda_{\text{ex}}$  = 320 nm.

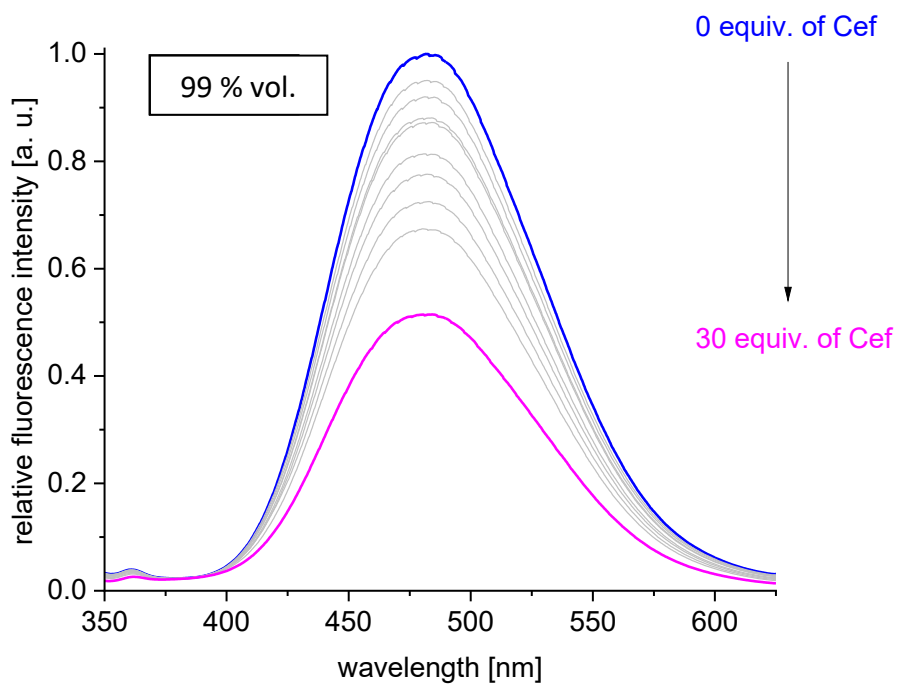

**Figure S53** Emission spectra of aggregated **F-B3E** in the presence of increasing molar equivalents of Ceftazidime (Cef). Conditions: buffer (PBS, pH = 7.40,  $C = 0.01\text{M}$ ):THF = 99:1 v/v,  $C = 2 \cdot 10^{-5} \text{ mol} \cdot \text{dm}^{-3}$ ,  $\lambda_{\text{ex}} = 320 \text{ nm}$ . For convenience, the value in the frame shows the water content.

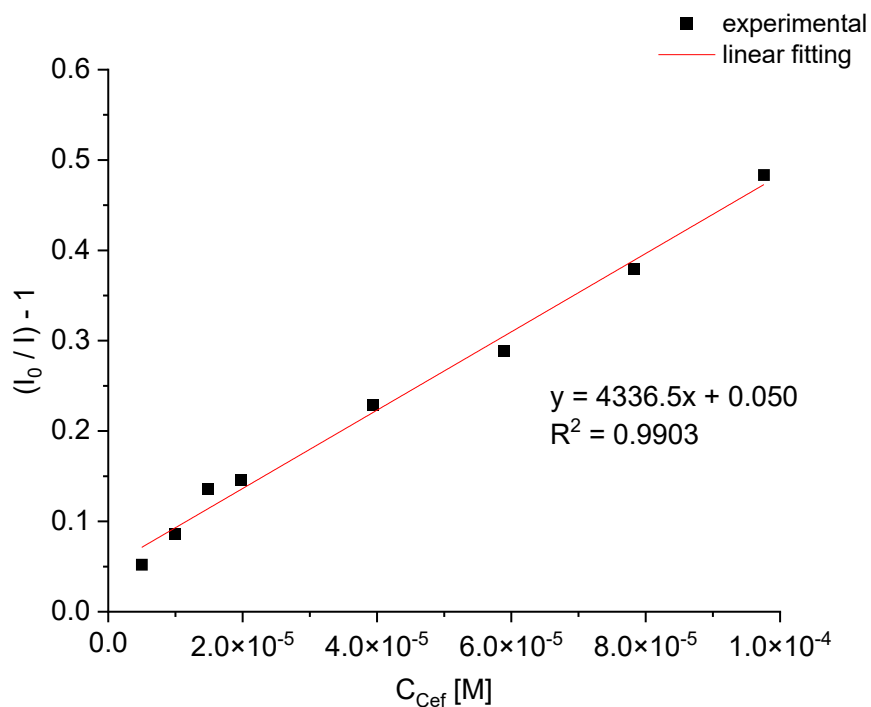

**Figure S54** Experimental points and linear fitting of Stern-Volmer correlation for spectrofluorimetric titration of **F-B3E** with Ceftazidime (Cef). Conditions: buffer (PBS, pH = 7.40,  $C = 0.01\text{M}$ ):THF = 99:1,  $C = 2 \cdot 10^{-5} \text{ mol} \cdot \text{dm}^{-3}$ ,  $\lambda_{\text{ex}} = 320 \text{ nm}$ .

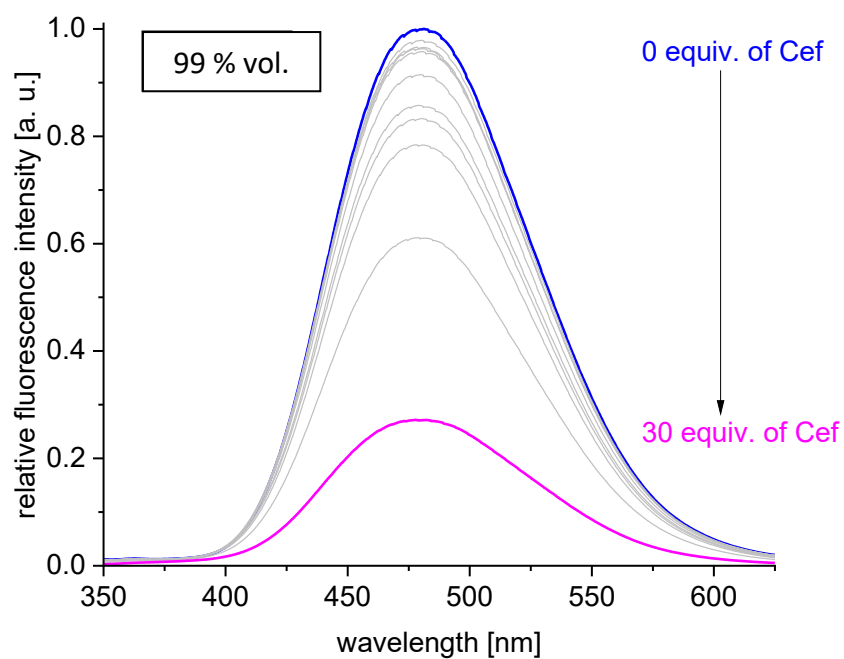

**Figure S55** Emission spectra of aggregated **F-B3E** in the presence of increasing molar equivalents of Ceftazidime (Cef). Conditions: buffer (Tris, pH = 8.29,  $C = 0.01\text{M}$ ):THF = 99:1 v/v,  $C = 2 \cdot 10^{-5} \text{ mol} \cdot \text{dm}^{-3}$ ,  $\lambda_{\text{ex}} = 320 \text{ nm}$ . For convenience, the value in the frame shows the water content.

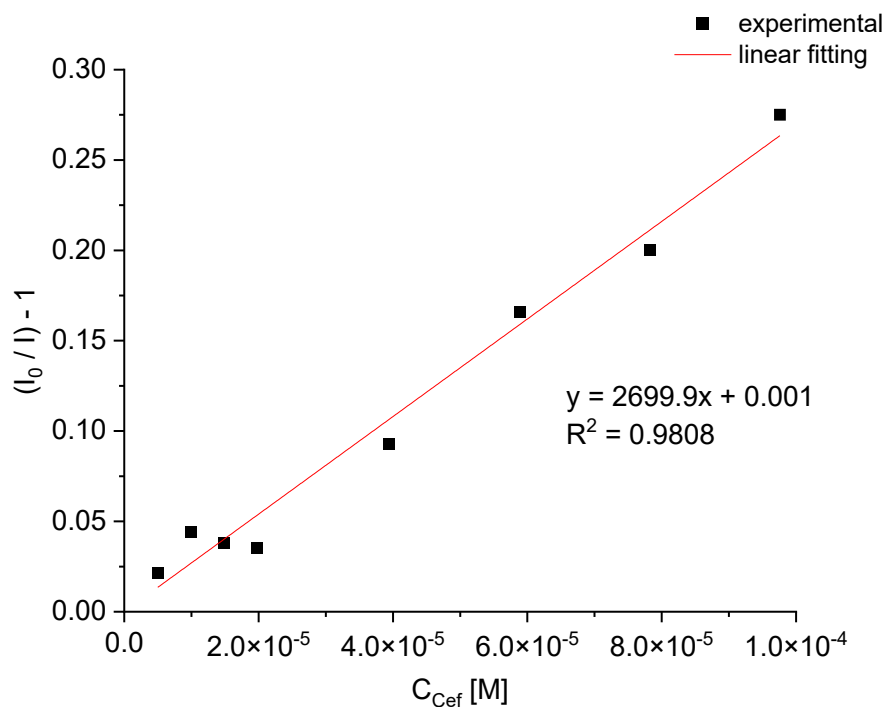

**Figure S56** Experimental points and linear fitting of Stern-Volmer correlation for spectrofluorimetric titration of **F-B3E** with Ceftazidime (Cef). Conditions: buffer (Tris, pH = 8.29,  $C = 0.01\text{M}$ ):THF = 99:1,  $C = 2 \cdot 10^{-5} \text{ mol} \cdot \text{dm}^{-3}$ ,  $\lambda_{\text{ex}} = 320 \text{ nm}$ .

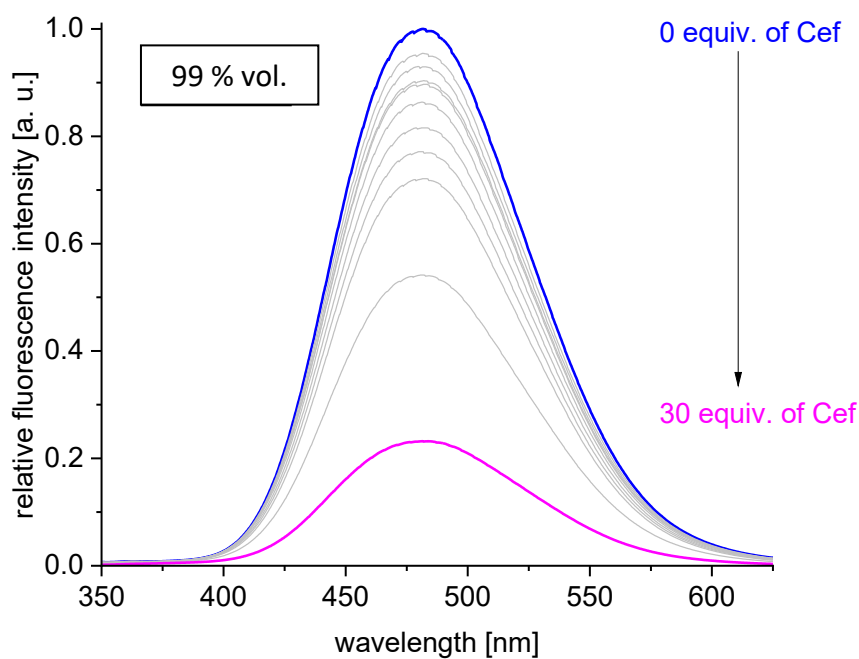

**Figure S57** Emission spectra of aggregated **B3E** in the presence of increasing molar equivalents of Ceftazidime (Cef). Conditions: tap water:THF = 99:1 v/v,  $C = 2 \cdot 10^{-5} \text{ mol} \cdot \text{dm}^{-3}$ ,  $\lambda_{\text{ex}} = 320 \text{ nm}$ . For convenience, the value in the frame shows the water content.

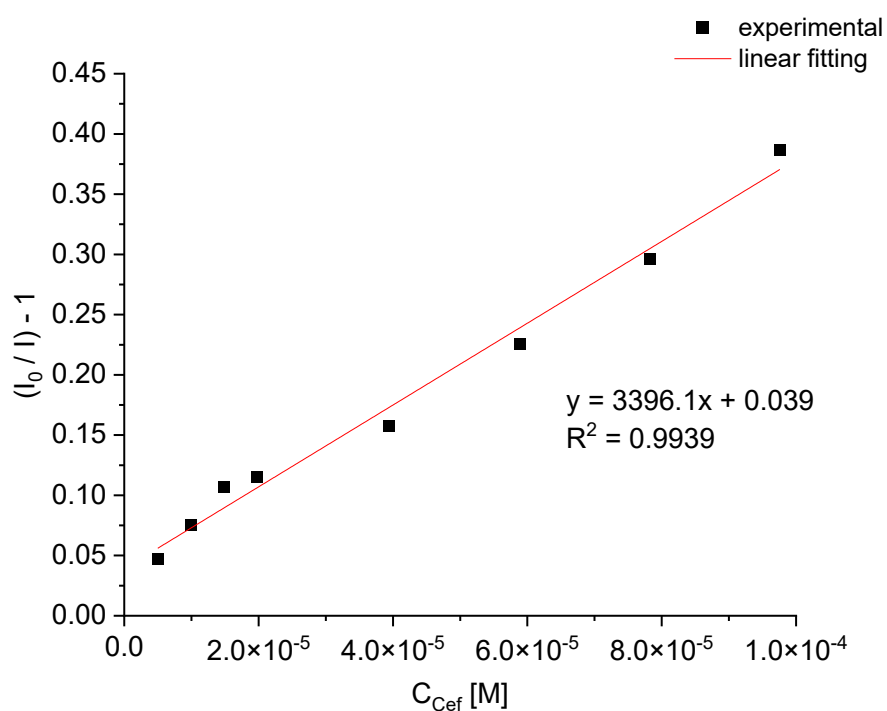

**Figure S58** Experimental points and linear fitting of Stern-Volmer correlation for spectrofluorimetric titration of **B3E** with Ceftazidime (Cef). Conditions: tap water:THF = 99:1,  $C = 2 \cdot 10^{-5} \text{ mol} \cdot \text{dm}^{-3}$ ,  $\lambda_{\text{ex}} = 320 \text{ nm}$ .

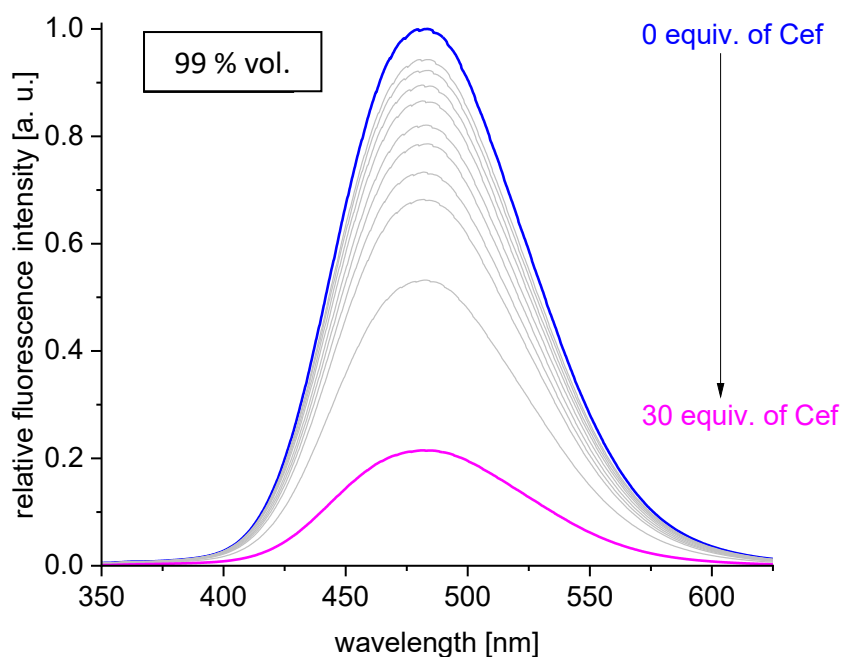

**Figure S59** Emission spectra of aggregated **B3E** in the presence of increasing molar equivalents of Ceftazidime (Cef). Conditions: artesian groundwater:THF = 99:1 v/v,  $C = 2 \cdot 10^{-5} \text{ mol} \cdot \text{dm}^{-3}$ ,  $\lambda_{\text{ex}} = 320 \text{ nm}$ . For convenience, the value in the frame shows the water content.

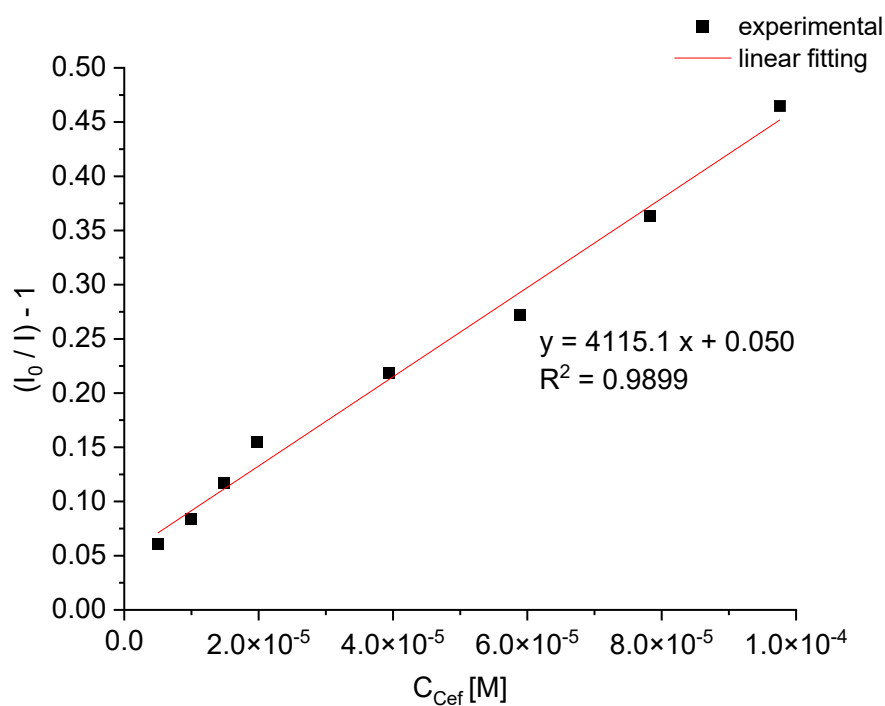

**Figure S60** Experimental points and linear fitting of Stern-Volmer correlation for spectrofluorimetric titration of **B3E** with Ceftazidime (Cef). Conditions: artesian water:THF = 99:1,  $C = 2 \cdot 10^{-5} \text{ mol} \cdot \text{dm}^{-3}$ ,  $\lambda_{\text{ex}} = 320 \text{ nm}$ .

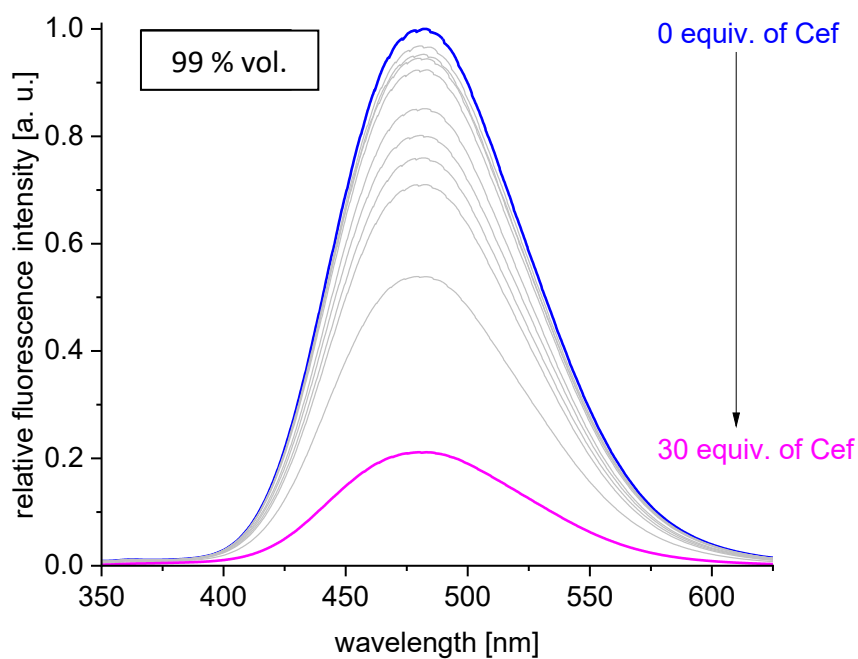

**Figure S61** Emission spectra of aggregated **B3E** in the presence of increasing molar equivalents of Ceftazidime (Cef). Conditions: filtered seawater:THF = 99:1 v/v,  $C = 2 \cdot 10^{-5} \text{ mol} \cdot \text{dm}^{-3}$ ,  $\lambda_{\text{ex}} = 320 \text{ nm}$ . For convenience, the value in the frame shows the water content.

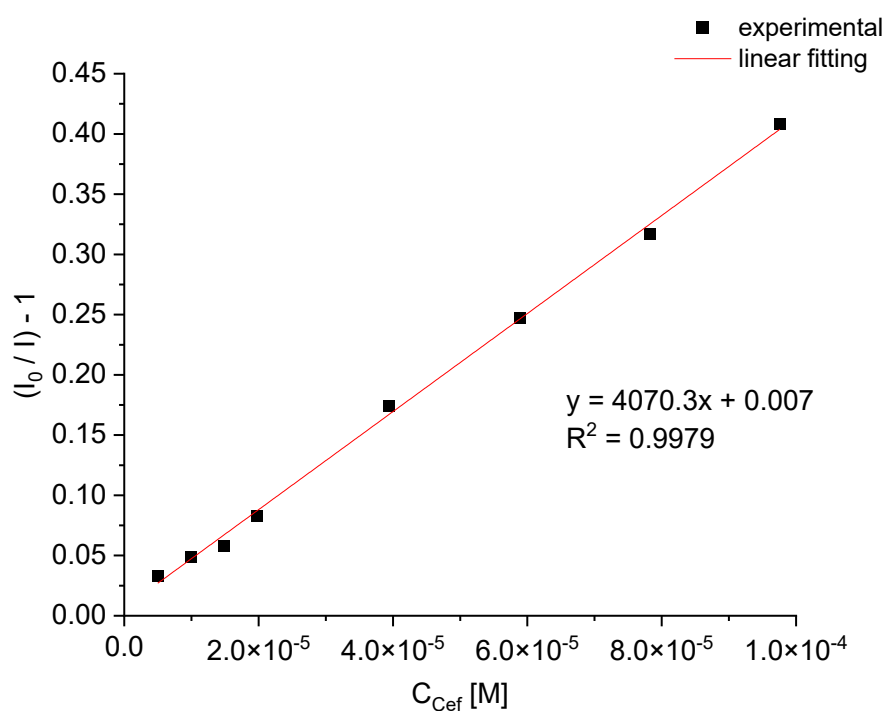

**Figure S62** Experimental points and linear fitting of Stern-Volmer correlation for spectrofluorimetric titration of **B3E** with Ceftazidime (Cef). Conditions: filtered seawater:THF = 99:1,  $C = 2 \cdot 10^{-5} \text{ mol} \cdot \text{dm}^{-3}$ ,  $\lambda_{\text{ex}} = 320 \text{ nm}$ .

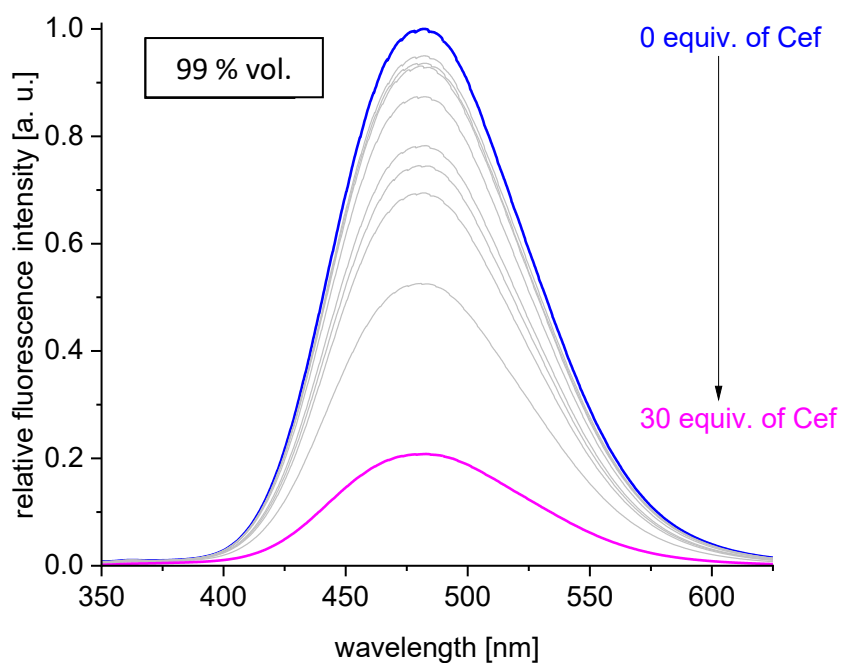

**Figure S63** Emission spectra of aggregated **B3E** in the presence of increasing molar equivalents of Ceftazidime (Cef). Conditions: non-filtered seawater:THF = 99:1 v/v,  $C = 2 \cdot 10^{-5} \text{ mol} \cdot \text{dm}^{-3}$ ,  $\lambda_{\text{ex}} = 320 \text{ nm}$ . For convenience, the value in the frame shows the water content.

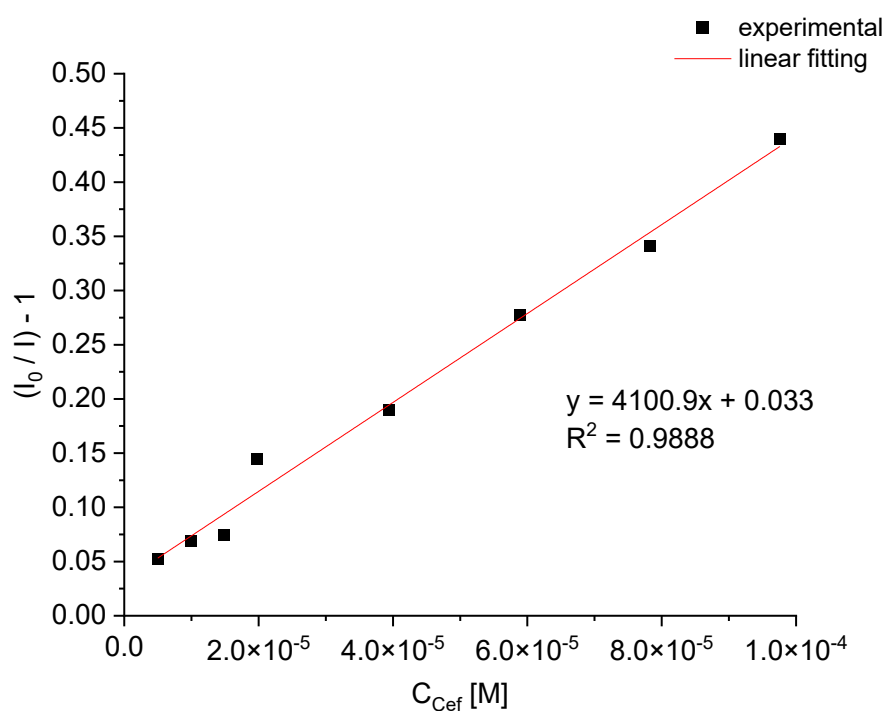

**Figure S64** Experimental points and linear fitting of Stern-Volmer correlation for spectrofluorimetric titration of **B3E** with Ceftazidime (Cef). Conditions: non-filtered seawater:THF = 99:1,  $C = 2 \cdot 10^{-5} \text{ mol} \cdot \text{dm}^{-3}$ ,  $\lambda_{\text{ex}} = 320 \text{ nm}$ .

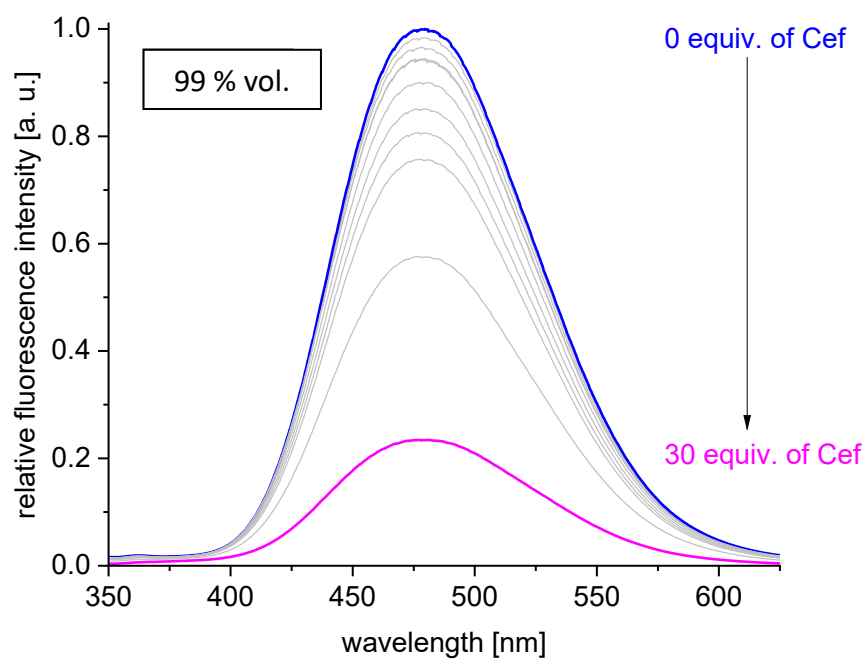

**Figure S65** Emission spectra of aggregated **F-B3E** in the presence of increasing molar equivalents of Ceftazidime (Cef). Conditions: tap water:THF = 99:1 v/v,  $C = 2 \cdot 10^{-5} \text{ mol} \cdot \text{dm}^{-3}$ ,  $\lambda_{\text{ex}} = 320 \text{ nm}$ . For convenience, the value in the frame shows the water content.

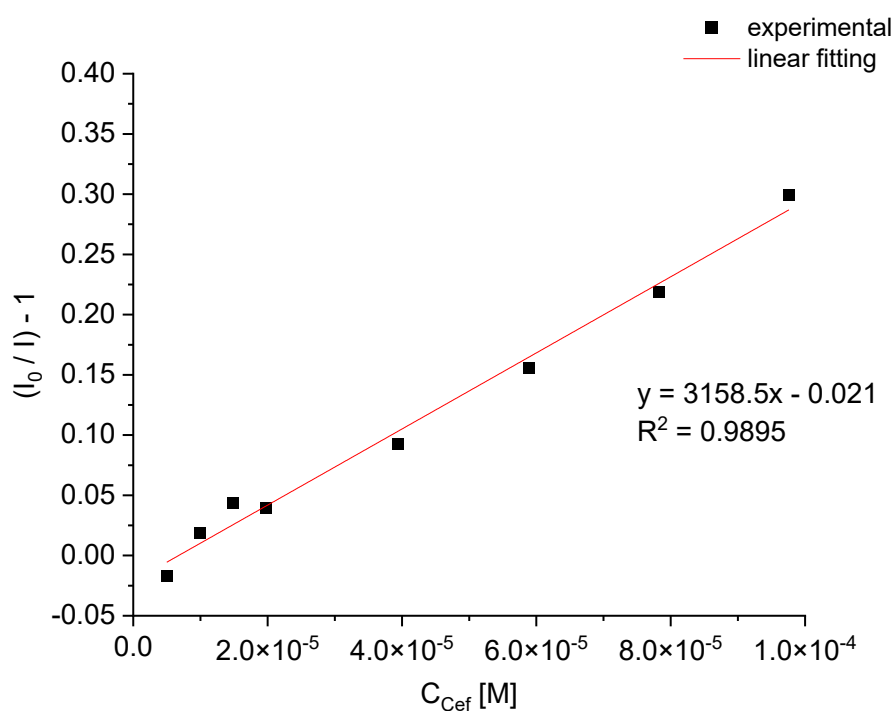

**Figure S66** Experimental points and linear fitting of Stern-Volmer correlation for spectrofluorimetric titration of **F-B3E** with Ceftazidime (Cef). Conditions: tap water:THF = 99:1,  $C = 2 \cdot 10^{-5} \text{ mol} \cdot \text{dm}^{-3}$ ,  $\lambda_{\text{ex}} = 320 \text{ nm}$ .

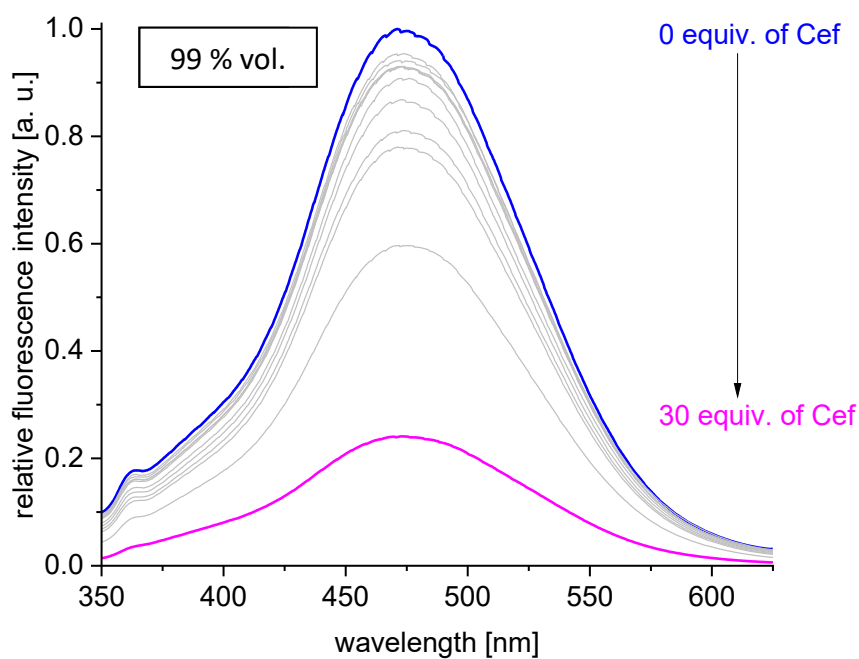

**Figure S67** Emission spectra of aggregated **F-B3E** in the presence of increasing molar equivalents of Ceftazidime (Cef). Conditions: artesian groundwater:THF = 99:1 v/v,  $C = 2 \cdot 10^{-5} \text{ mol} \cdot \text{dm}^{-3}$ ,  $\lambda_{\text{ex}} = 320 \text{ nm}$ . For convenience, the value in the frame shows the water content.

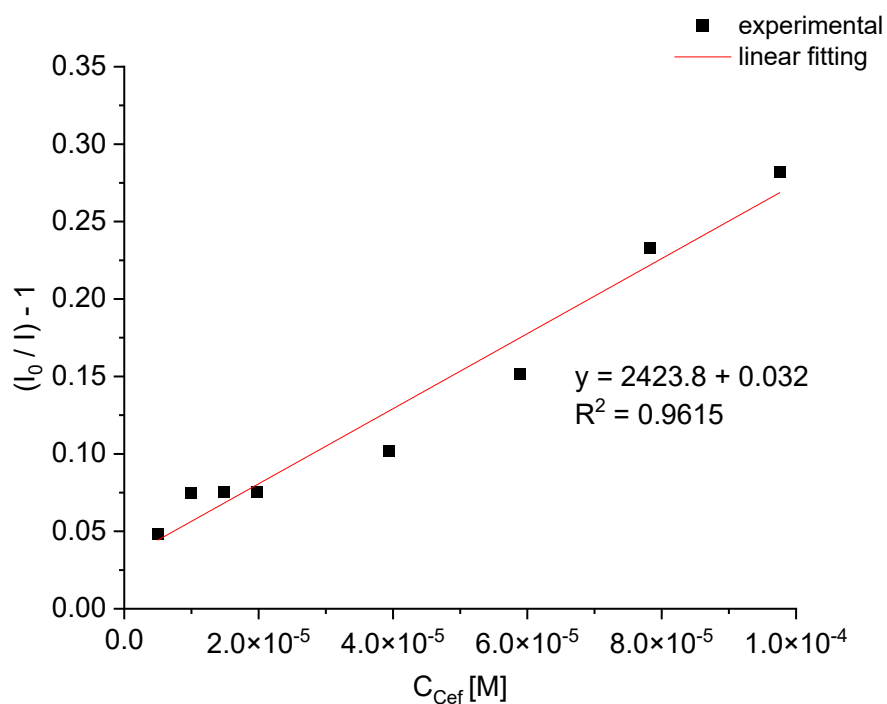

**Figure S68** Experimental points and linear fitting of Stern-Volmer correlation for spectrofluorimetric titration of **F-B3E** with Ceftazidime (Cef). Conditions: artesian water:THF = 99:1,  $C = 2 \cdot 10^{-5} \text{ mol} \cdot \text{dm}^{-3}$ ,  $\lambda_{\text{ex}} = 320 \text{ nm}$ .

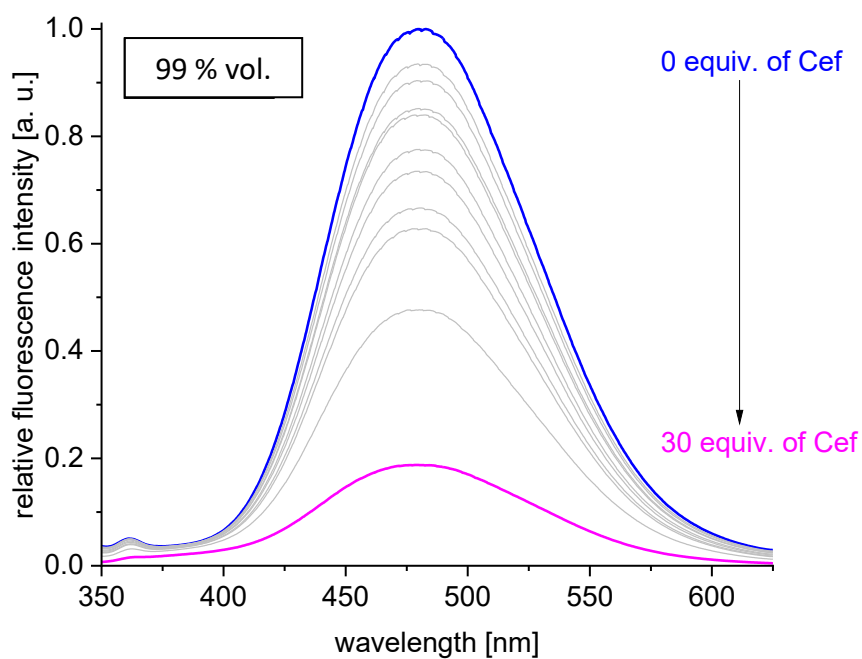

**Figure S69** Emission spectra of aggregated **F-B3E** in the presence of increasing molar equivalents of Ceftazidime (Cef). Conditions: filtered water:THF = 99:1 v/v,  $C = 2 \cdot 10^{-5} \text{ mol} \cdot \text{dm}^{-3}$ ,  $\lambda_{\text{ex}} = 320 \text{ nm}$ . For convenience, the value in the frame shows the water content.

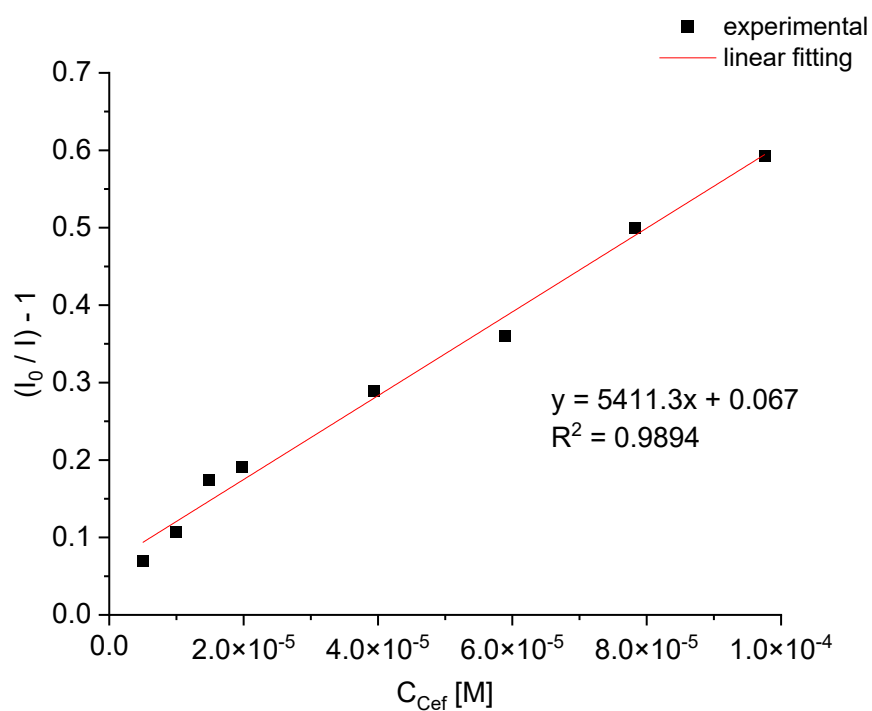

**Figure S70** Experimental points and linear fitting of Stern-Volmer correlation for spectrofluorimetric titration of **F-B3E** with Ceftazidime (Cef). Conditions: filtered water:THF = 99:1,  $C = 2 \cdot 10^{-5} \text{ mol} \cdot \text{dm}^{-3}$ ,  $\lambda_{\text{ex}} = 320 \text{ nm}$ .

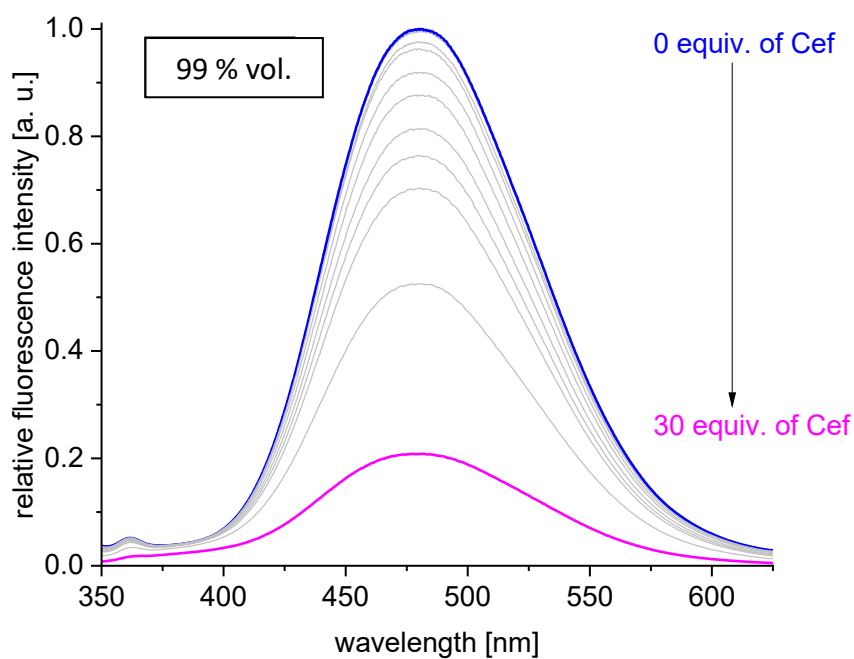

**Figure S71** Emission spectra of aggregated **F-B3E** in the presence of increasing molar equivalents of Ceftazidime (Cef). Conditions: non-filtered water:THF = 99:1 v/v,  $C = 2 \cdot 10^{-5} \text{ mol} \cdot \text{dm}^{-3}$ ,  $\lambda_{\text{ex}} = 320 \text{ nm}$ . For convenience, the value in the frame shows the water content.

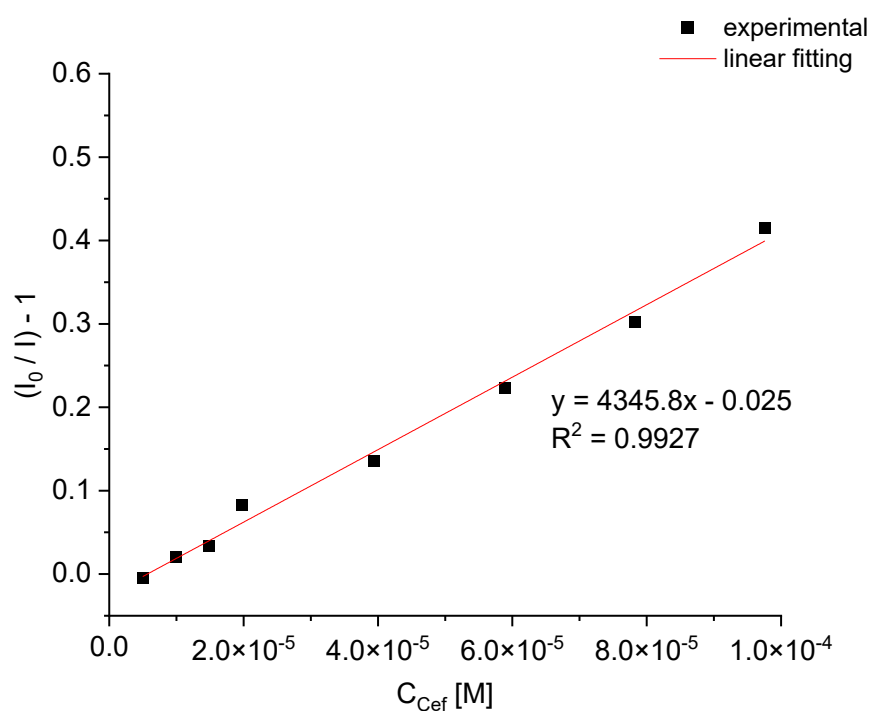

**Figure S72** Experimental points and linear fitting of Stern-Volmer correlation for spectrofluorimetric titration of **F-B3E** with Ceftazidime (Cef). Conditions: non-filtered water:THF = 99:1,  $C = 2 \cdot 10^{-5} \text{ mol} \cdot \text{dm}^{-3}$ ,  $\lambda_{\text{ex}} = 320 \text{ nm}$ .

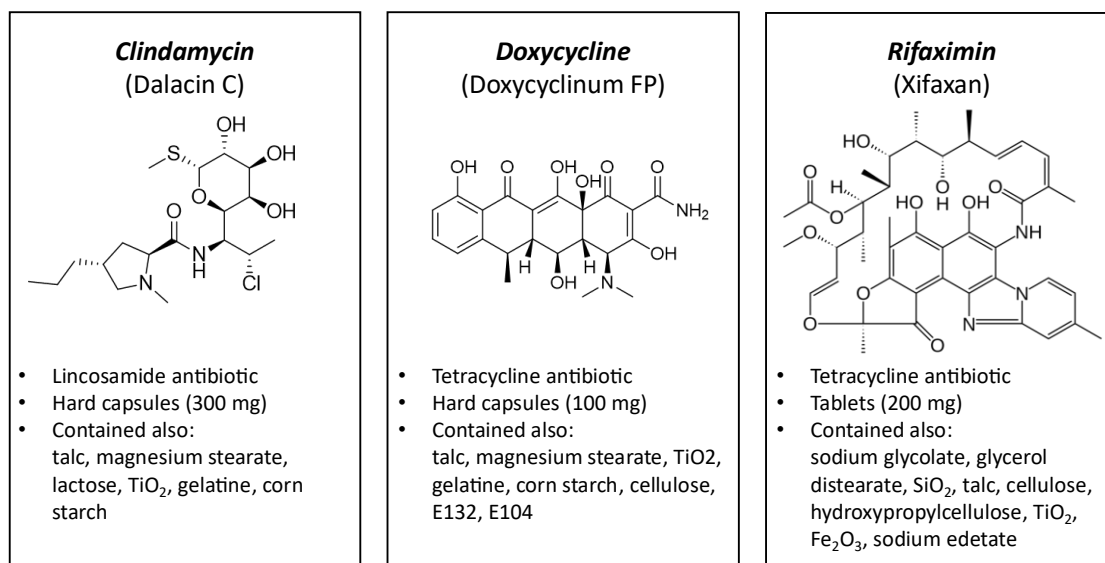

**Figure S73** Chemical structures, description and containment of real medical products used as antibiotic source for additional competitive titrations.

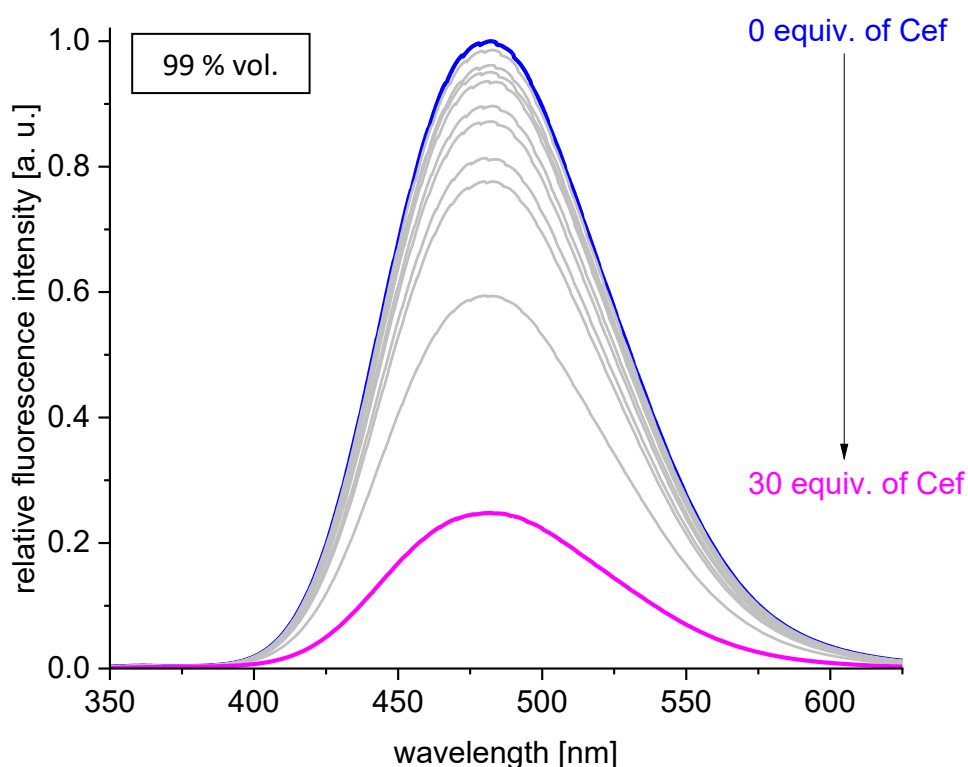

**Figure S74** Emission spectra of aggregated **B3E** with addition of Ampicillin (1 molar equiv.) in the presence of increasing molar equivalents of Ceftazidime (Cef). Conditions: H<sub>2</sub>O:THF = 99:1 v/v, C = 2·10<sup>-5</sup> mol·dm<sup>-3</sup>, λ<sub>ex</sub> = 320 nm. For convenience, the value in the frame shows the water content. Calculated Stern-Volmer constant: K<sub>S,V</sub> = 2795 ± 126 M<sup>-1</sup>.

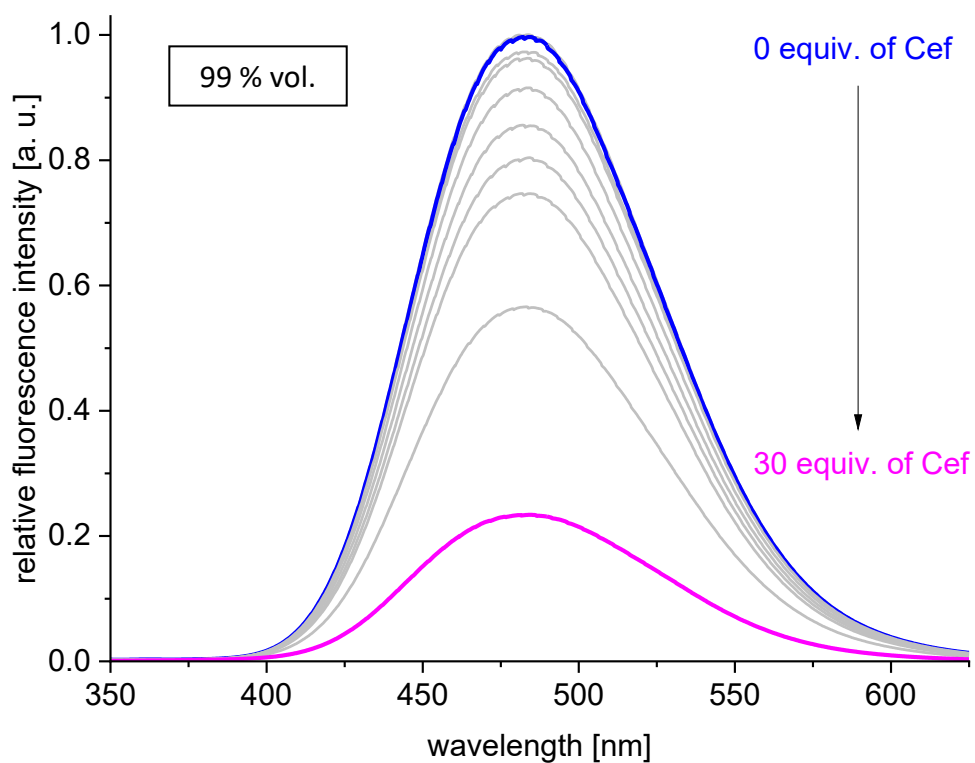

**Figure S75** Emission spectra of aggregated **B3E** with addition of Clindamycin (1 molar equiv.) in the presence of increasing molar equivalents of Ceftazidime (Cef). Conditions: H<sub>2</sub>O:THF = 99:1 v/v, C = 2·10<sup>-5</sup> mol·dm<sup>-3</sup>, λ<sub>ex</sub> = 320 nm. For convenience, the value in the frame shows the water content. Calculated Stern-Volmer constant:  $K_{S-V} = 2597 \pm 155 \text{ M}^{-1}$ .

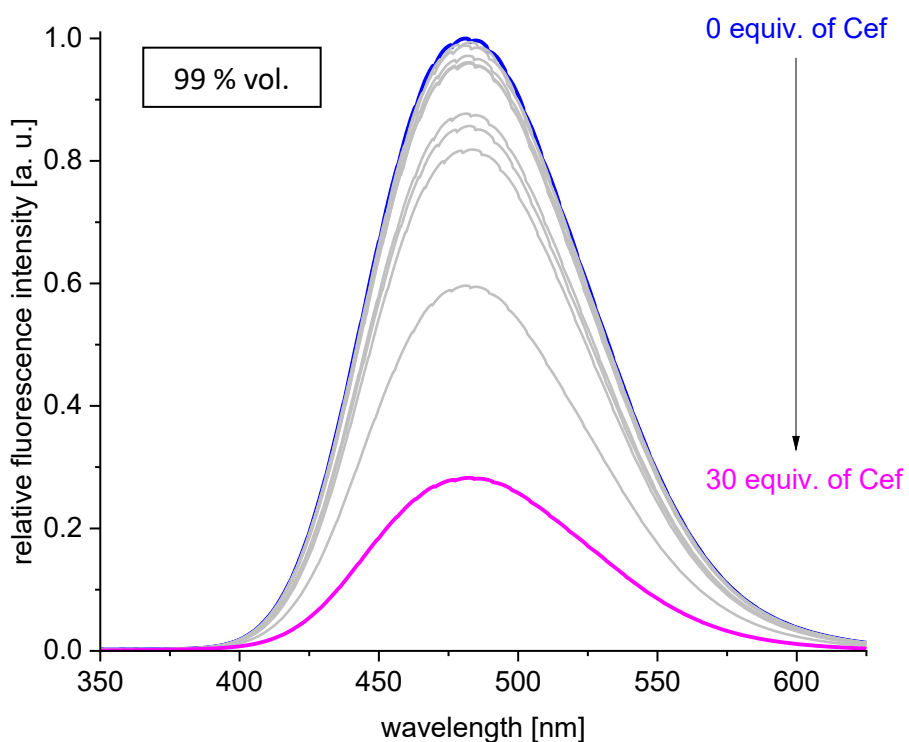

**Figure S76** Emission spectra of aggregated **B3E** with addition of Doxycycline (1 molar equiv.) in the presence of increasing molar equivalents of Ceftazidime (Cef). Conditions: H<sub>2</sub>O:THF = 99:1 v/v, C = 2·10<sup>-5</sup> mol·dm<sup>-3</sup>, λ<sub>ex</sub> = 320 nm. For convenience, the value in the frame shows the water content. Calculated Stern-Volmer constant:  $K_{S-V} = 2161 \pm 160 \text{ M}^{-1}$ .

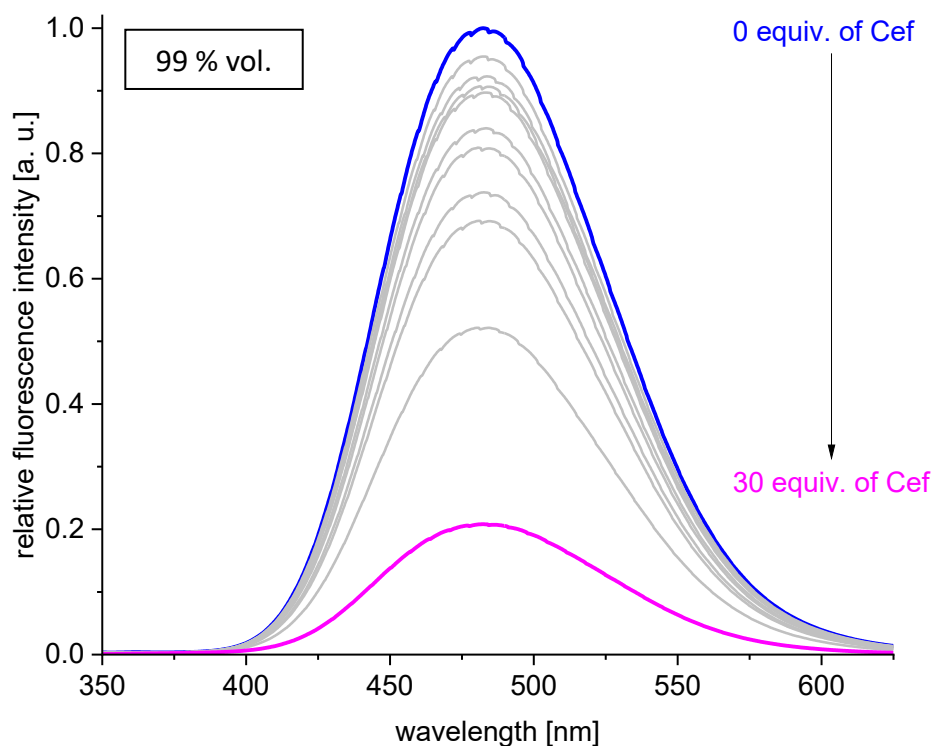

**Figure S77** Emission spectra of aggregated **B3E** with addition of Rifaximin (1 molar equiv.) in the presence of increasing molar equivalents of Ceftazidime (Cef). Conditions:  $\text{H}_2\text{O}:\text{THF} = 99:1 \text{ v/v}$ ,  $C = 2 \cdot 10^{-5} \text{ mol} \cdot \text{dm}^{-3}$ ,  $\lambda_{\text{ex}} = 320 \text{ nm}$ . For convenience, the value in the frame shows the water content. Calculated Stern-Volmer constant:  $K_{\text{S-V}} = 4060 \pm 188 \text{ M}^{-1}$ .

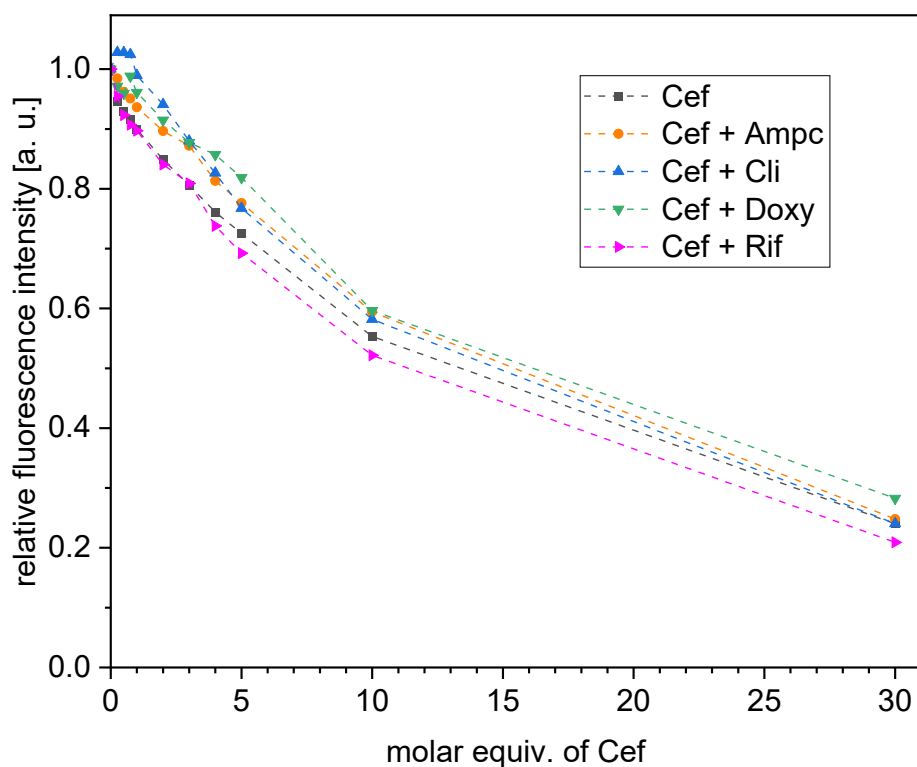

**Figure S78** Titration curves for interactions between aggregated **B3E** and Cef in the absence or presence of antibiotic interferents (1 molar equiv.). Conditions:  $\text{H}_2\text{O}:\text{THF} = 99:1 \text{ v/v}$ ,  $C = 2 \cdot 10^{-5} \text{ mol} \cdot \text{dm}^{-3}$ ,  $\lambda_{\text{ex}} = 320 \text{ nm}$ . Ampc = Ampicillin. Cli = Clindamycin. Doxy = Doxycyclin. Rif = Rifaximin.

## S6.2 NMR studies

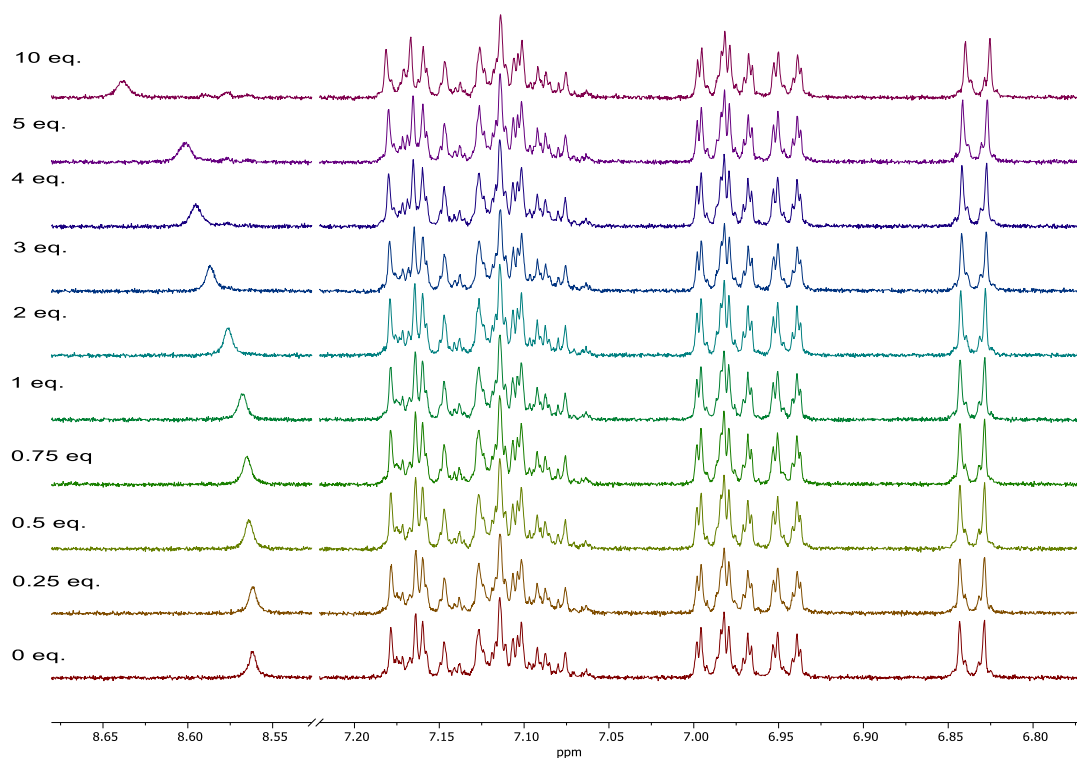

**Figure S79** Evolution of  $^1\text{H}$  NMR spectra (600 MHz,  $\text{DMSO-}d_6$  + TMS,  $C_{\text{B3E}} = 3.8 \cdot 10^{-4}$  M) for titration of **B3E** with 0-10 equiv. of Cef. Insets presenting signals from **B3E** protons.

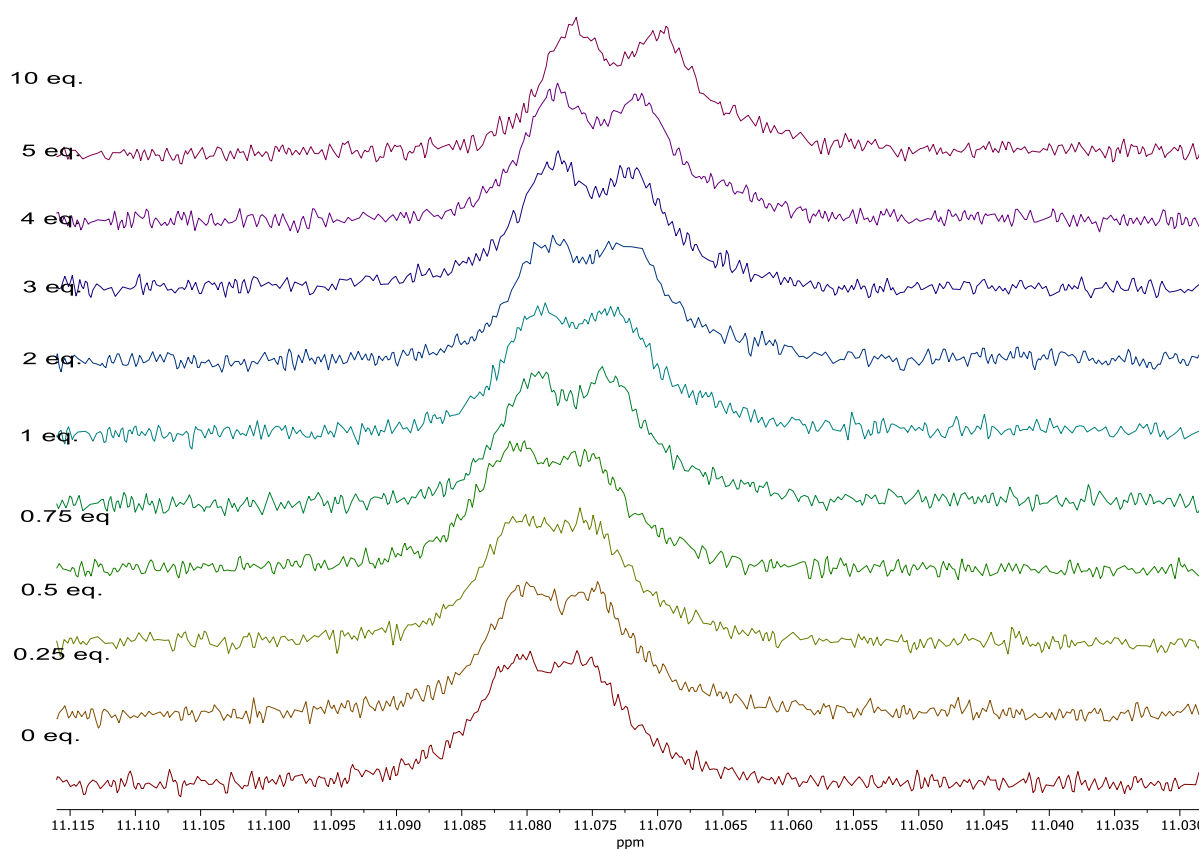

**Figure S80** Evolution of  $^1\text{H}$  NMR spectra (600 MHz,  $\text{DMSO-}d_6$  + TMS,  $C_{\text{F-B3E}} = 3.8 \cdot 10^{-4}$  M) for titration of **F-B3E** with 0-10 equiv. of Cef. Inset presenting N-H signal from **F-B3E** protons.

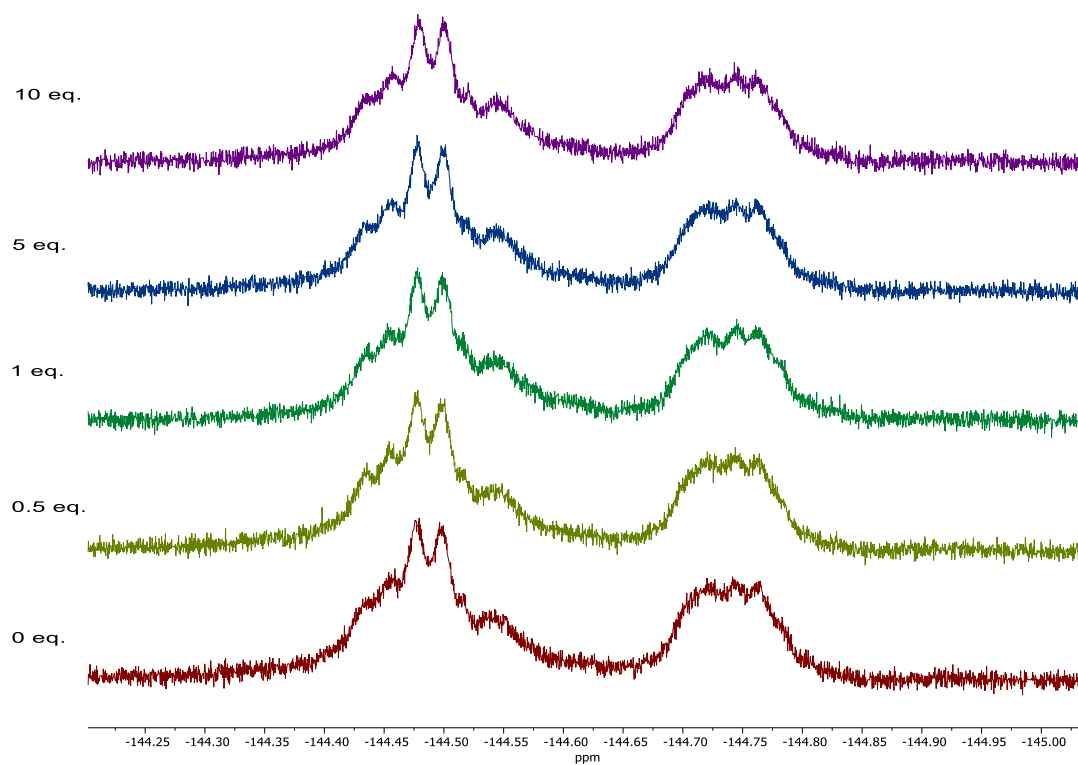

**Figure S 81** Evolution of  $^{19}\text{F}$  NMR spectra (565 MHz,  $\text{DMSO-}d_6 + \text{C}_6\text{F}_6$ ,  $C_{\text{F-B3E}} = 3.8 \cdot 10^{-4} \text{ M}$ ) for titration of **F-B3E** with 0-10 equiv. of Cef. Insets presenting signals from **F-B3E**  $^{19}\text{F}$  nuclei.

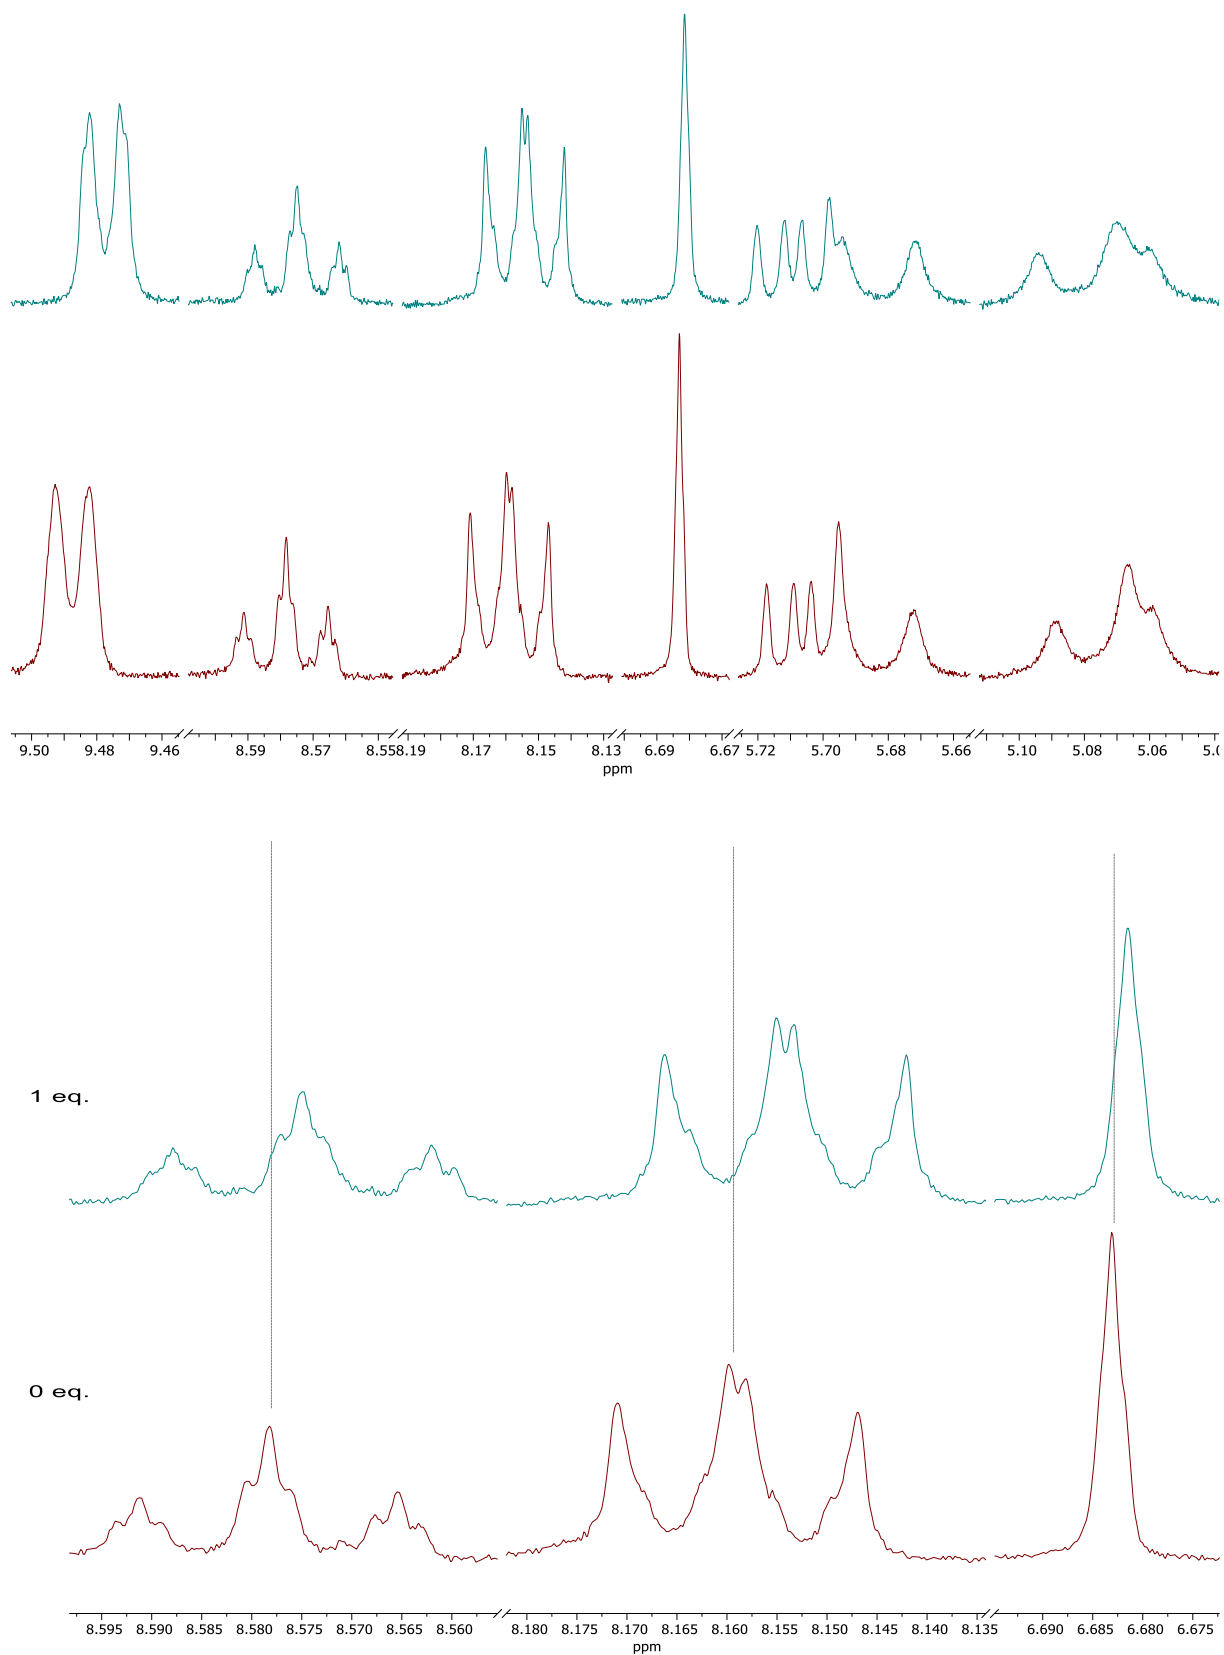

**Figure S82** Stacked  $^1\text{H}$  NMR spectra (600 MHz,  $\text{DMSO-}d_6$ ) of Ceftazidime with and without presence of 1 molar equiv. of **B3E**: **(top)** all Cef signals, **(bottom)** inset – pyridinium moiety protons.

### S6.3 DLS studies

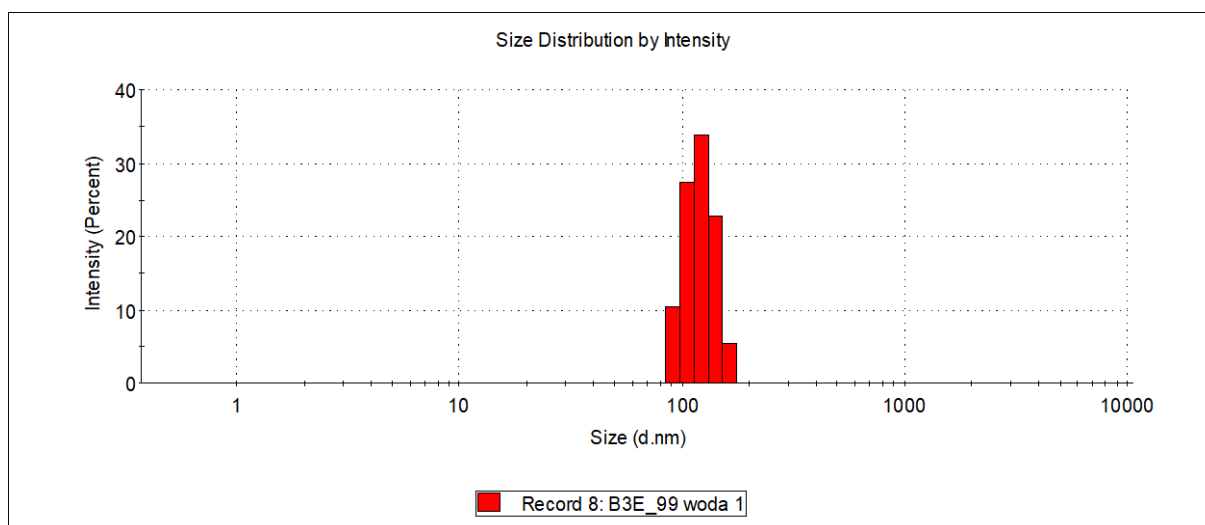

**Figure S83** DLS experiment results: size distribution by intensity for **B3E** in H<sub>2</sub>O:THF 99:1 v/v.  $C = 2 \cdot 10^{-5}$  M. Average aggregate size in dominant peak:  $d = 121.3$  nm.

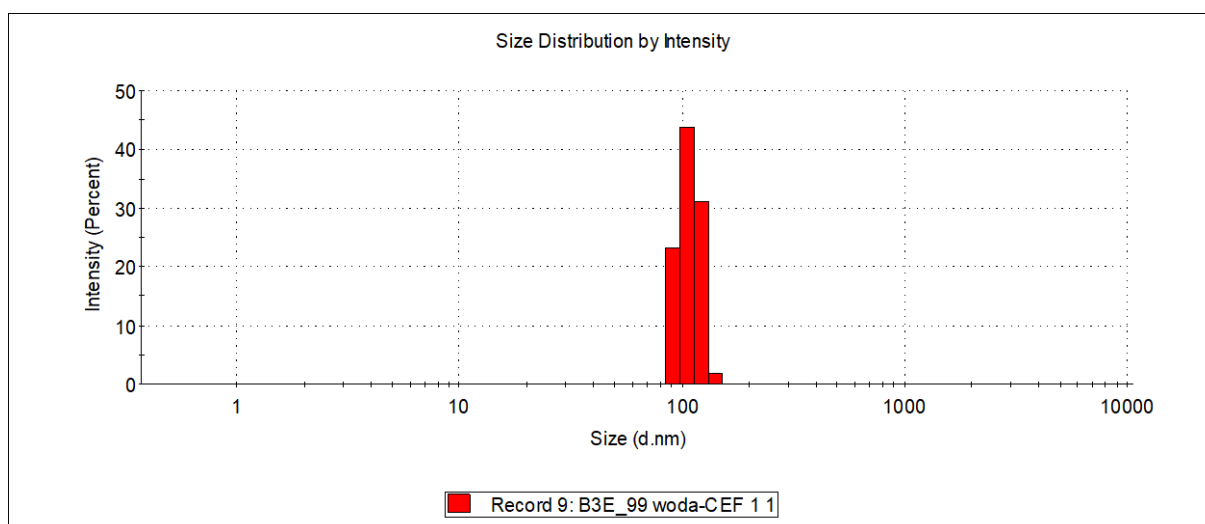

**Figure S84** DLS experiment results: size distribution by intensity for **B3E** in H<sub>2</sub>O:THF 99:1 v/v in presence of 1 equiv. of Cef.  $C = 2 \cdot 10^{-5}$  M. Average aggregate size in dominant peak:  $d = 108.2$  nm.

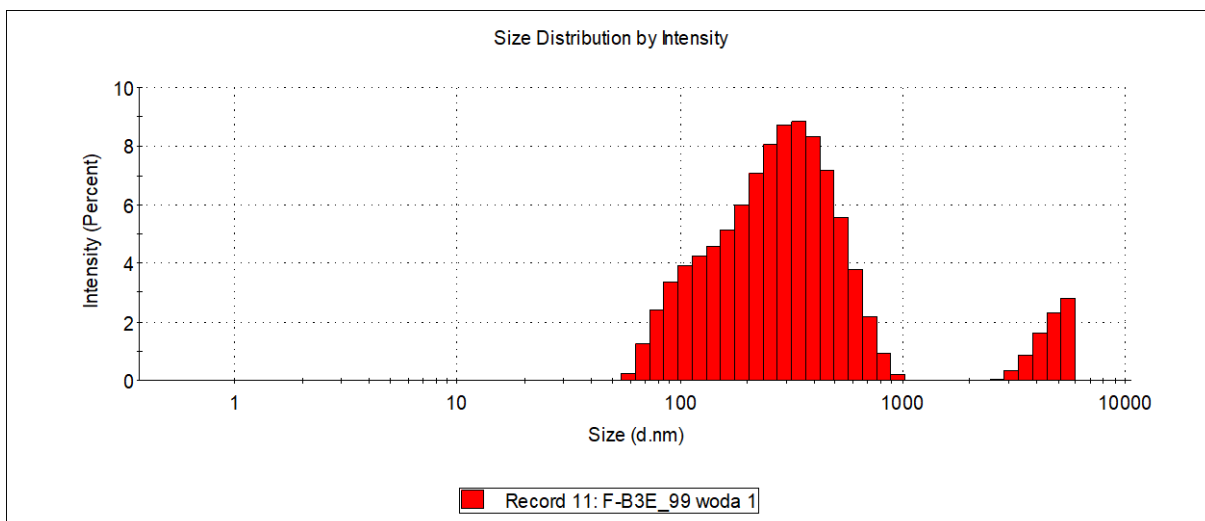

**Figure S85** DLS experiment results: size distribution by intensity for **F-B3E** in H<sub>2</sub>O:THF 99:1 v/v.  $C = 2 \cdot 10^{-5}$  M. Average aggregate size in dominant peak:  $d = 302.1$  nm.

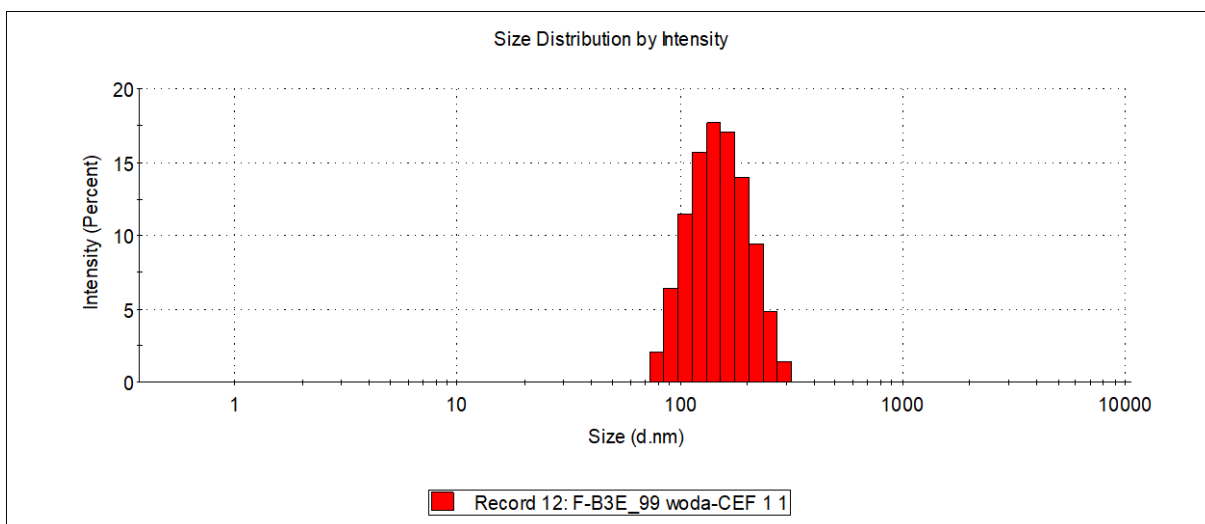

**Figure S86** DLS experiment results: size distribution by intensity for **F-B3E** in H<sub>2</sub>O:THF 99:1 v/v in presence of 1 equiv. of Cef.  $C = 2 \cdot 10^{-5}$  M. Average aggregate size in dominant peak:  $d = 218.6$  nm.

## S7. Water and analytes characteristics

As ultrapure water LiChrosolv® Water for chromatography (LC-MS Grade) from Supelco® (Merck) was used.

A tap water sample was collected from the house faucet (Warsaw, Poland, produced by Warsaw Waterworks) on 15.01.2026.

A seawater sample was collected from the Baltic Sea in Karwia, Poland 54°49'59.7"N, 18°11'44.5"E) on 18.01.2026.

An artesian well water sample was collected from a public well (Warsaw, Zajączka Str. 7) on 04.02.2026.

Water samples were characterised by ICP-MS for presence of 23 elements (**Table 10**)

**Table S11** Characteristics of water samples (ICP-MS)

| Sample |                 | Ultrapure water | Tap water | Artesian water | Seawater  |
|--------|-----------------|-----------------|-----------|----------------|-----------|
| Li     | C [µg/L]        | 3.8354          | 11.6115   | 46.5121        | 41.3274   |
|        | Variance [µg/L] | 2.3644          | 1.8605    | 3.3297         | 2.8881    |
| Na     | C [µg/L]        | < LOQ           | 67.2061   | 122.4429       | 1936.1519 |
|        | Variance [µg/L] |                 | 1.2561    | 1.2033         | 20.3419   |
| Mg     | C [µg/L]        | < LOQ           | 14.9759   | 12.5920        | 248.9977  |
|        | Variance [µg/L] |                 | 0.2236    | 0.1876         | 3.1814    |
| Al     | C [µg/L]        | 11.3194         | 41.2143   | 32.5819        | 50.5783   |
|        | Variance [µg/L] | 3.5000          | 3.7262    | 3.8467         | 35.6992   |
| K      | C [µg/L]        | <LOQ            | 12.3571   | 10.3715        | 74.9475   |
|        | Variance [µg/L] |                 | 0.2140    | 0.1209         | 0.9866    |
| Ca     | C [µg/L]        | 0.6019          | 92.9393   | 42.9102        | 107.4244  |
|        | Variance [µg/L] | 0.0861          | 1.6868    | 0.9243         | 1.4342    |
| Fe     | C [µg/L]        | 8.2163          | 36.6901   | 74.4229        | 36.1414   |
|        | Variance [µg/L] | 1.1941          | 3.6710    | 2.1667         | 2.1358    |
| Y      | C [µg/L]        | 0.4339          | 1.2111    | 1.6644         | 1.6765    |
|        | Variance [µg/L] | 0.0057          | 0.1035    | 0.0850         | 0.0922    |
| La     | C [µg/L]        | 0.0008          | 0.1058    | 0.0507         | 0.0058    |
|        | Variance [µg/L] | 0.0159          | 0.0561    | 0.0612         | 0.0457    |
| V      | C [µg/L]        | < LOQ           | < LOQ     | < LOQ          | 3.3850    |
|        | Variance [µg/L] |                 |           |                | 2.9615    |
| Cr     | C [µg/L]        | 0.0060          | 0.3004    | 0.0120         | 0.9349    |
|        | Variance [µg/L] | 0.0749          | 0.0782    | 0.0400         | 0.1018    |
| Mn     | C [µg/L]        | 0.1013          | 1.3240    | 104.2899       | 2.0512    |
|        | Variance [µg/L] | 0.0303          | 0.0549    | 1.6105         | 0.0583    |
| Co     | C [µg/L]        | 0.0506          | 0.1607    | 0.0979         | 0.1338    |
|        | Variance [µg/L] | 0.0363          | 0.0250    | 0.0195         | 0.0210    |
| Ni     | C [µg/L]        | 0.0583          | 3.0054    | 1.0628         | 1.7981    |
|        | Variance [µg/L] | 0.1195          | 0.3949    | 0.2527         | 0.3176    |
| Cu     | C [µg/L]        | 2.2112          | 59.2647   | 86.6914        | 61.0410   |
|        | Variance [µg/L] | 0.4173          | 2.6043    | 2.3228         | 11.7759   |
| Zn     | C [µg/L]        | < LOQ           | 83.5593   | 29.1310        | 7.5022    |
|        | Variance [µg/L] |                 | 1.7795    | 1.4118         | 0.8702    |

|    |                              |         |          |         |         |
|----|------------------------------|---------|----------|---------|---------|
| As | C [ $\mu\text{g/L}$ ]        | 0.09188 | 0.6547   | 0.1959  | 1.6387  |
|    | Variance [ $\mu\text{g/L}$ ] | 0.0157  | 0.1295   | 0.0771  | 0.2448  |
| Se | C [ $\mu\text{g/L}$ ]        | 1.1988  | 4.7785   | 4.6083  | 93.0353 |
|    | Variance [ $\mu\text{g/L}$ ] | 0.3538  | 0.7757   | 0.6983  | 2.8926  |
| Mo | C [ $\mu\text{g/L}$ ]        | 0.5745  | 3.2183   | 1.5171  | 5.9255  |
|    | Variance [ $\mu\text{g/L}$ ] | 0.2890  | 0.4574   | 0.2570  | 1.1584  |
| Ag | C [ $\mu\text{g/L}$ ]        | 0.0432  | 0.9825   | 0.1993  | 3.0847  |
|    | Variance [ $\mu\text{g/L}$ ] | 0.0336  | 0.0962   | 0.0277  | 0.1113  |
| Cd | C [ $\mu\text{g/L}$ ]        | 0.1109  | 1.1308   | 0.3956  | 1.0442  |
|    | Variance [ $\mu\text{g/L}$ ] | 0.0492  | 0.1267   | 0.0584  | 0.1070  |
| Ba | C [ $\mu\text{g/L}$ ]        | 0.0873  | 47.7408  | 12.5286 | 22.7566 |
|    | Variance [ $\mu\text{g/L}$ ] | 0.1928  | 0.7848   | 0.3606  | 0.4581  |
| Pb | C [ $\mu\text{g/L}$ ]        | 0.4447  | 60.02542 | 19.3513 | 57.4245 |
|    | Variance [ $\mu\text{g/L}$ ] | 0.1802  | 0.8241   | 0.4189  | 0.8679  |

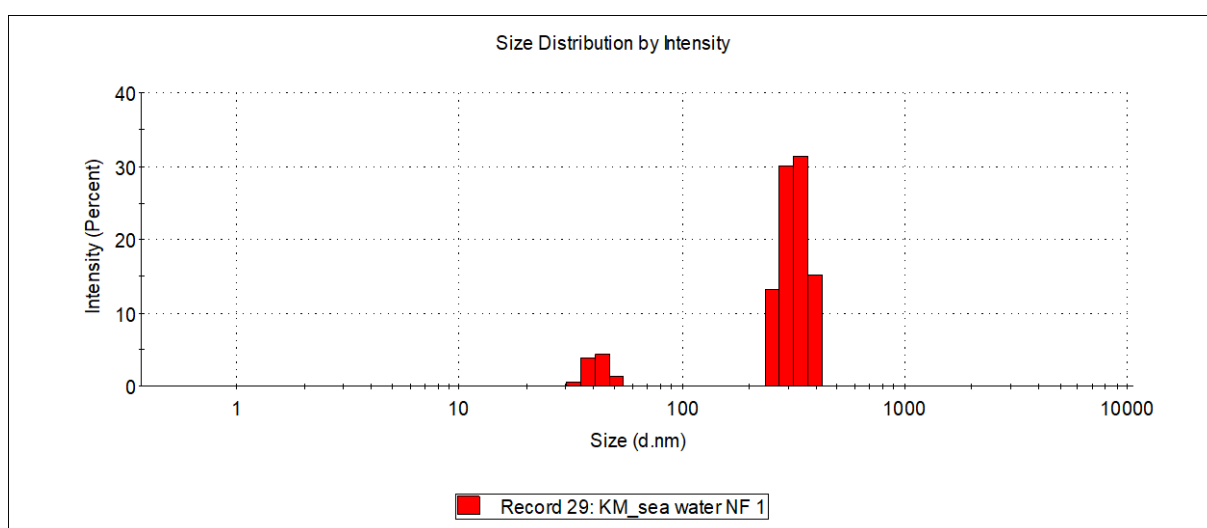

**Figure S87** DLS experiment results: size distribution by intensity for non-filtered (crude) seawater. Average aggregate size:  $d = 840.5 \text{ nm}$

## S8. References

- 1 S. S. Sebastian, H. Lee, S. Badarukhiya, R. K. Christoffels, J. M. Gebauer and U. Ruschewitz, *Chem. Eur. J.*, 2024, **30**, e202402334.
- 2 J. S. Cyniak and A. Kasprzak, *RSC Adv.*, 2024, **14**, 13227–13236.
- 3 M. J. Frisch, G. W. Trucks, H. B. Schlegel, G. E. Scuseria, M. A. Robb, J. R. Cheeseman, G. Scalmani, V. Barone, G. A. Petersson, H. Nakatsuji, X. Li, M. Caricato, A. V. Marenich, J. Bloino, B. G. Janesko, R. Gomperts, B. Mennucci, H. P. Hratchian, J. V. Ortiz, A. F. Izmaylov, L. Sonnenberg, D. Williams-Young, F. Ding, F. Lipparini, F. Egidi, J. Goings, B. Peng, A. Petrone, T. Henderson, D. Ranasinghe, V. G. Zakrzewski, J. Gao, N. Rega, G. Zheng, W. Liang, M. Hada, M. Ehara, K. Toyota, R. Fukuda, J. Hasegawa, M. Ishida, T. Nakajima, Y. Honda, O. Kitao, H. Nakai, T. Vreven, K. Throssell, J. A. Montgomery, Jr., J. E. Peralta, F. Ogliaro, M. J. Bearpark, J. J. Heyd, E. N. Brothers, K. N. Kudin, V. N. Staroverov, T. A. Keith, R. Kobayashi, J. Normand, K. Raghavachari, A. P. Rendell, J. C. Burant, S. S. Iyengar, J. Tomasi, M. Cossi, J. M. Millam, M. Klene, C. Adamo, R. Cammi, J. W. Ochterski, R. L. Martin, K. Morokuma, O. Farkas, J. B. Foresman and D. J. Fox, *Gaussian 16, Revision C.01*, Gaussian, Inc., Wallingford CT, 2016.
- 4 A. D. Becke, *J. Chem. Phys.*, 1993, **98**, 5648–5652.
- 5 J. S. Binkley, J. A. Pople and W. J. Hehre, *J. Am. Chem. Soc.*, 1980, **102**, 939–947.
- 6 R. Dennington, T. A. Keith and J. M. Millam, *GaussView, Version 6.1*, Semichem Inc., Shawnee Mission, KS, 2016.
